# Supplementary material
Source: PubMed Central journal article supplement (PMC152296)

```
(* © Orly Alter 2003 *)
```

```
(* All Rights Reserved *)
```

```
(* GSVD Comparative Analysis of Yeast and Human Cell Cycles *)
```

```
<< LinearAlgebra`MatrixManipulation`;  
<< NumericalMath`TrigFit`;  
<< Graphics`Graphics`;  
<< Graphics`Arrow`;  
Off[General::"spell"]; Off[General::"spell1"];
```

```
(* Define HardDrive *)
```

```
name = "Marzipan";
```

```
(* Read Yeast Data *)
```

```
stream = StringJoin[name, ":Desktop Folder:PNAS Data:Yeast.txt"];  
matrix = ReadList[stream, Word, RecordLists -> True, NullWords -> True];  
{genes, arrays} = Dimensions[matrix] - {2, 6}  
Clear[stream];
```

```
{4523, 18}
```

```
genenames = TakeRows [  
  TakeColumns[matrix, {1, 6}],  
  {3, genes + 2}];  
arraynames = TakeColumns [  
  TakeRows[matrix, {1, 2}],  
  {7, arrays + 6}];  
matrix = TakeColumns [  
  TakeRows[matrix, {3, genes + 2}],  
  {7, arrays + 6}];  
matrix = ToExpression[matrix];
```

```
sizes = Flatten [  
  Table [  
    Dimensions [  
      Characters [  
        ToString[arraynames[[2, a]]  
        ]],  
    {a, 1, arrays}]]];  
size = Sort[sizes, OrderedQ[{-#2, #1}] &][[1]];  
Do [  
  Do[arraynames[[2, a]] = StringJoin[ToString[arraynames[[2, a]]], " "],  
  {b, 1, size - sizes[[a]]},  
  {a, 1, arrays}];
```

```
(* Estimate Missing Yeast Data Using SVD *)
```

```
(* Count Null Data *)
```

```
counter = Table[Dimensions[Position[matrix[[a]], Null]][[1]], {a, 1, genes}];
```

```
(* Locate Gene Position of Null Data *)
```

```
Clear[positions];  
positions = Table[0, {a, 1, arrays + 1}];  
Do[  
  positions[[a]] = Flatten[  
    Position[Flatten[counter], a - 1],  
    {a, 1, arrays + 1}];  
numbers = Flatten[  
  Table[  
    Dimensions[positions[[a]]],  
    {a, 1, Round[arrays * 0.2]}];
```

```
(* Create Display Of Gene Position Of Null Data *)
```

```
framex = Table[{a, a - 1}, {a, 1, Round[arrays * 0.2]}];  
framey = {500, 1000, 1500, 2000, 2500, 3000};  
labelx = ColumnForm[{"Number of Arrays"}, Center];  
labely = ColumnForm[{"Number of Genes"}, Center];  
g = BarChart[numbers,  
  Frame -> True,  
  Axes -> False,  
  FrameLabel -> {labelx, labely, None, None},  
  FrameTicks -> {framex, framey, None, None},  
  GridLines -> {None, None},  
  PlotRange -> {{0.5, Round[arrays * 0.2] + 0.5}, {0, 3000}},  
  DisplayFunction -> Identity];  
g = FullGraphics[g];  
g[[1, 2]] = g[[1, 2]] /.  
  Text[labely, {b_, c_}, {1., 0.}] ->  
  Text[labely, {b - 0.75, c}, {0, 0}, {0, 1}];  
g[[1, 2]] = g[[1, 2]] /.  
  Text[labelx, {b_, c_}, {0., 1.}] ->  
  Text[labelx, {b, c - 400}, {0, 1}, {1, 0}];  
g[[1, 2]] = g[[1, 2]] /.  
  Text[a_, {b_, c_}, {0., 1.}] ->  
  Text[a, {b, c - 200}, {0, 0}, {0, 1}];
```

```
(* Display Gene Position Of Null Data *)
```

```
Show[g, PlotRange -> All];
```

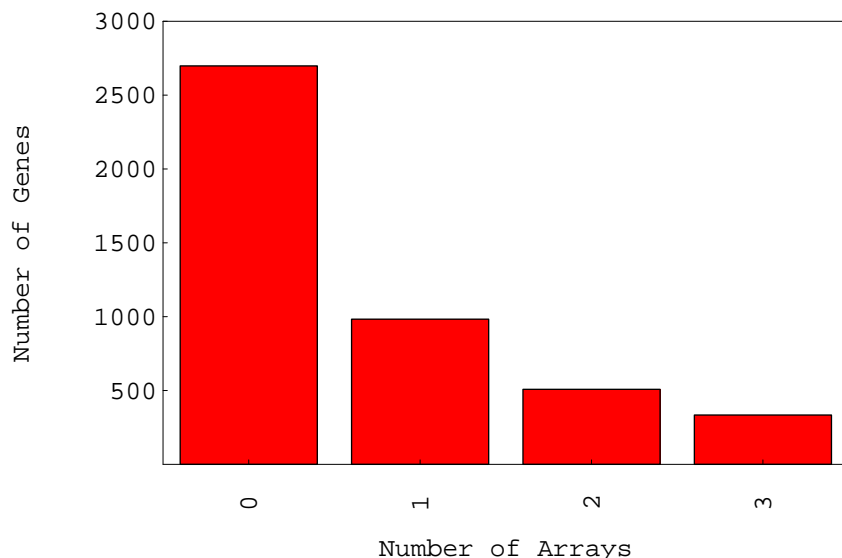

```
(* Select Genes by Number of Missing Data Points *)
```

```
matrix = AppendRows[Table[{counter[[a]]}, {a, 1, genes}], genenames, matrix];  
matrix = Sort[matrix, OrderedQ[{#1, #2} &];  
fullgenenames = TakeColumns[  
  TakeRows[matrix, {1, numbers[[1]]}],  
  {2, 7}];  
fullmatrix = TakeColumns[  
  TakeRows[matrix, {1, numbers[[1]]}],  
  {8, arrays + 7}];  
missinggenenames1 = TakeColumns[  
  TakeRows[matrix, {numbers[[1]] + 1, numbers[[1]] + numbers[[2]]}],  
  {2, 7}];  
missingmatrix1 = TakeColumns[  
  TakeRows[matrix, {numbers[[1]] + 1, numbers[[1]] + numbers[[2]]}],  
  {8, arrays + 7}];  
missinggenenames2 = TakeColumns[  
  TakeRows[matrix,  
    {numbers[[1]] + numbers[[2]] + 1,  
    numbers[[1]] + numbers[[2]] + numbers[[3]]}],  
  {2, 7}];  
missingmatrix2 = TakeColumns[  
  TakeRows[matrix,  
    {numbers[[1]] + numbers[[2]] + 1,  
    numbers[[1]] + numbers[[2]] + numbers[[3]]}],  
  {8, arrays + 7}];  
missinggenenames3 = TakeColumns[  
  TakeRows[matrix,  
    {numbers[[1]] + numbers[[2]] + numbers[[3]] + 1,  
    numbers[[1]] + numbers[[2]] + numbers[[3]] + numbers[[4]]}],  
  {2, 7}];  
missingmatrix3 = TakeColumns[  
  TakeRows[matrix,  
    {numbers[[1]] + numbers[[2]] + numbers[[3]] + 1,  
    numbers[[1]] + numbers[[2]] + numbers[[3]] + numbers[[4]]}],  
  {8, arrays + 7}];
```

```
(* Locate Array Position of Null Data *)
```

```
locator1 = Table[0, {numbers[[2]]};  
Do[  
  locator1[[a]] = locator1[[a]] + Flatten[Position[missingmatrix1[[a]], Null]],  
  {a, 1, numbers[[2]]};  
locator2 = Table[0, {numbers[[3]]};  
Do[  
  locator2[[a]] = locator2[[a]] + Flatten[Position[missingmatrix2[[a]], Null]],  
  {a, 1, numbers[[3]]};  
locator3 = Table[0, {numbers[[4]]};  
Do[  
  locator3[[a]] = locator3[[a]] + Flatten[Position[missingmatrix3[[a]], Null]],  
  {a, 1, numbers[[4]]};
```

```
(* Sort Raw Elutriation Data According to the Position of Missing Data Points for Each Gene *)
```

```
missingmatrix1 = AppendRows[locator1, missinggenenames1, missingmatrix1];  
missingmatrix1 = Sort[missingmatrix1, OrderedQ[{{#1, #2}} &];  
locator1 = TakeColumns[missingmatrix1, {1, 1}];  
missinggenenames1 = TakeColumns[missingmatrix1, {2, 7}];  
missingmatrix1 = TakeColumns[missingmatrix1, {8, arrays + 7}];  
missingmatrix2 = AppendRows[locator2, missinggenenames2, missingmatrix2];  
missingmatrix2 = Sort[missingmatrix2, OrderedQ[{{#1, #2}} &];  
locator2 = TakeColumns[missingmatrix2, {1, 2}];  
missinggenenames2 = TakeColumns[missingmatrix2, {3, 8}];  
missingmatrix2 = TakeColumns[missingmatrix2, {9, arrays + 8}];  
missingmatrix3 = AppendRows[locator3, missinggenenames3, missingmatrix3];  
missingmatrix3 = Sort[missingmatrix3, OrderedQ[{{#1, #2}} &];  
locator3 = TakeColumns[missingmatrix3, {1, 3}];  
missinggenenames3 = TakeColumns[missingmatrix3, {4, 9}];  
missingmatrix3 = TakeColumns[missingmatrix3, {10, arrays + 9}];
```

```
(* Examine Subset of Genes with Full Data *)
```

```
(* Calculate SVD *)
```

```
{eigenarrays, eigenexpressions, eigengenes} = SingularValues[fullmatrix];  
eigenarrays = Transpose[eigenarrays];  
fractions = eigenexpressions^2 / Sum[eigenexpressions[[a]]^2, {a, 1, arrays}];  
entropy = -N[Sum[fractions[[a]] * Log[fractions[[a]]], {a, 1, arrays}] / Log[arrays];  
entropy = N[Round[100 * entropy] / 100]
```

```
0.17
```

```
(* Create Fractions Bar Charts Displays *)
```

```
fractions[[3]]
```

```
0.00817395
```

```
limit = 0.01;
```

```
Clear[gridx, framex, framey, sizes];  
gridx = Table[a, {a, 0, limit, N[limit/5]}];  
framex = gridx;  
sizes = Flatten[  
  Table[  
    Dimensions[  
      Characters[  
        ToString[framex[[a]]  
      ]], {a, 1, 6}];  
Do[  
  Do[framex[[a]] = StringJoin[ToString[framex[[a]]], " "],  
    {b, 1, 5 - sizes[[a]]},  
    {a, 1, 6}];  
framex = Table[{gridx[[a]], framex[[a]]}, {a, 1, 6};  
gridx = Table[{gridx[[a]], RGBColor[0, 0, 0]}, {a, 1, 6};  
framey = Table[{a + 1, arrays - a - 6}, {a, 0, 12 - 3}];  
table = Table[fractions[[arrays - a]], {a, 6, arrays - 3};
```

```

g = BarChart[table,
  BarOrientation -> Horizontal,
  PlotRange -> {{0, limit * 1.0001}, {0.5, 12 - 2 + 0.5}},
  AspectRatio -> 1,
  Axes -> False,
  Frame -> True,
  FrameTicks -> {None, framey, framex, None},
  FrameLabel -> {None, None, None, None},
  GridLines -> {gridx, None},
  DisplayFunction -> Identity];
g = FullGraphics[g];
g[[1, 2]] = g[[1, 2]] /.
  Text[a_, {b_, c_}, {0., -1.}] ->
  Text[a, {b, c + 1.75}, {0, 0}, {0, 1}];
g1 = Show[g,
  AspectRatio -> 1.25,
  PlotRange -> All,
  DisplayFunction -> Identity];

gridx = Table[a, {a, 0, 1, 0.2}];
framex = gridx;
sizes = Flatten[
  Table[
    Dimensions[
      Characters[
        ToString[framex[[a]]
      ]], {a, 1, 6}]];
Do[
  Do[framex[[a]] = StringJoin[ToString[framex[[a]]], " "],
  {b, 1, size - sizes[[a]]}],
  {a, 1, 6}];
framex = Table[{gridx[[a]], framex[[a]]}, {a, 1, 6}];
gridx = Table[{gridx[[a]], RGBColor[0, 0, 0]}, {a, 1, 6}];
framey = Table[{a + 1, arrays - a}, {a, 0, arrays - 1}];
labelx = ColumnForm[
  {"(b) Eigenexpression Fraction", StringJoin["di = ", ToString[entropy]], " "},
  Center];
g = BarChart[
  Table[fractions[[arrays - a]], {a, 0, arrays - 1}],
  BarOrientation -> Horizontal,
  PlotRange -> {{0, 1.0001}, {0.5, arrays + 0.5}},
  AspectRatio -> 1,
  Axes -> False,
  Frame -> True,
  FrameTicks -> {None, framey, framex, None},
  FrameLabel -> {None, None, labelx, None},
  GridLines -> {gridx, None},
  DisplayFunction -> Identity];
g = FullGraphics[g];
g[[1, 2]] = g[[1, 2]] /.
  Text[labelx, {b_, c_}, {0., -1.}] ->
  Text[labelx, {b, c + 3}, {0, -1}, {1, 0}];
g[[1, 2]] = g[[1, 2]] /.
  Text[a_, {b_, c_}, {0., -1.}] ->
  Text[a, {b, c + 2.7}, {0, 0}, {0, 1}];
g2 = Show[{g,
  Graphics[{RGBColor[1, 1, 0.8], Rectangle[{0.1, 0.6}, {0.98, 16.6}]}],
  Graphics[{Rectangle[{0.1, 0.6}, {0.98, 16.6}, g1}]}],
  AspectRatio -> 1.35,
  PlotRange -> All,
  DisplayFunction -> Identity];

```

(\* Create Eigengenes 2D Red & Green Raster Display \*)

```
contrast = 3.5;
displaying = Table[
  If[contrast * eigengenes[[i, j]] > 0,
    If[contrast * eigengenes[[i, j]] < 1, {contrast * eigengenes[[i, j]], 0}, {1, 0}],
    If[contrast * eigengenes[[i, j]] > -1, {0, -contrast * eigengenes[[i, j]]}, {0, 1}]],
  {i, 1, arrays}, {j, 1, arrays}];
framex = Table[{a - 0.5, arraynames[[2, a]]}, {a, 1, arrays}];
framey = Table[{a + 1 - 0.5, arrays - a}, {a, 0, arrays - 1}];
labely = "Eigengenes";
labelx = ColumnForm[{"(a) Arrays", " ", " "}, Center];
```

```
g = Show[
  Graphics[
    RasterArray[
      Table[
        RGBColor[displaying[[i, j, 1]], displaying[[i, j, 2]], 0],
        {i, arrays, 1, -1}, {j, 1, arrays}]]],
  AspectRatio -> 1,
  Frame -> True,
  FrameTicks -> {None, framey, framex, None},
  FrameLabel -> {None, labely, labelx, None},
  DisplayFunction -> Identity];
g = FullGraphics[g];
g[[1, 2]] = g[[1, 2]] /.
  Text[labely, {b_, c_}, {1., 0.}] ->
  Text[labely, {b - 3, c}, {0, 0}, {0, 1}];
g[[1, 2]] = g[[1, 2]] /.
  Text[labelx, {b_, c_}, {0., -1.}] ->
  Text[labelx, {b, c + 3}, {0, -1}, {1, 0}];
g[[1, 2]] = g[[1, 2]] /.
  Text[a_, {b_, c_}, {0., -1.}] ->
  Text[a, {b, c + 2.7}, {0, 0}, {0, 1}];
g1 = Show[g,
  AspectRatio -> 1.05,
  PlotRange -> All,
  DisplayFunction -> Identity];
```

(\* Create Selected Eigengenes Graph Display \*)

```
eigengenes3 = Chop[TrigFit[Drop[eigengenes[[3]], {1}], 2, {x - 1, arrays - 1}], 0.15]
eigengenes4 = Chop[TrigFit[Drop[eigengenes[[4]], {1}], 2, {x - 1, arrays - 1}], 0.15]
eigengenes5 = Chop[TrigFit[Drop[eigengenes[[5]], {1}], 2, {x - 1, arrays - 1}], 0.15]
```

$$-0.152794 \cos\left[\frac{2}{17} \pi (-1 + x)\right] - 0.154139 \sin\left[\frac{2}{17} \pi (-1 + x)\right] - 0.197288 \sin\left[\frac{4}{17} \pi (-1 + x)\right]$$

$$-0.263474 \cos\left[\frac{4}{17} \pi (-1 + x)\right]$$

$$0.157833 \cos\left[\frac{4}{17} \pi (-1 + x)\right] - 0.204812 \sin\left[\frac{4}{17} \pi (-1 + x)\right]$$

```
eigengenes3 = -Sqrt[2/3/17.] * Sin[4 * Pi * (x - 1) / 17] - Sqrt[2/3/17.] * Sin[2 * Pi * (x - 1) / 17 + Pi / 4];
```

```
eigengenes4 = -Sqrt[2/17.] * Cos[4 * Pi * (x - 1) / 17];
```

```
eigengenes5 = Sqrt[2/17.] * Cos[4 * Pi * (x - 1) / 17 + Pi / 4];
```

```

labelx = ColumnForm[{"(c) Arrays"}, Center];
labely = ColumnForm[{" ", "Expression Level"}, Center];
framex = Table[{a - 1, arraynames[[2, a]]}, {a, 1, arrays}];
framey = {-1, -0.5, 0, 0.5, 1};
coordinates = Table[{a - 1, eigengenes[[1, a]]}, {a, 1, arrays}];
points = Table[Point[coordinates[[a]]], {a, 1, arrays}];
line = Line[coordinates];
g = Show[
  {Graphics[{RGBColor[1, 0, 0], PointSize[0.022], points}],
  Graphics[{RGBColor[1, 0, 0], line}]},
  Frame -> True,
  FrameLabel -> {None, labely, labelx, None},
  GridLines -> {None, {{0, RGBColor[0, 0, 0]}}},
  FrameTicks -> {None, framey, framex, None},
  PlotRange -> {-1.05, 1.05},
  DisplayFunction -> Identity];
g = FullGraphics[g];
g[[1, 2]] = g[[1, 2]] /.
  Text[labely, {b_, c_}, {1., 0.}] ->
  Text[labely, {b - 5.4, c}, {0, 0}, {0, 1}];
g[[1, 2]] = g[[1, 2]] /.
  Text[labelx, {b_, c_}, {0., -1.}] ->
  Text[labelx, {b, c + 0.625}, {0, -1}, {1, 0}];
g[[1, 2]] = g[[1, 2]] /.
  Text[a_, {b_, c_}, {0., -1.}] ->
  Text[a, {b, c + 0.25}, {0, 0}, {0, 1}];
p1 = Show[g,
  AspectRatio -> 1.05,
  PlotRange -> All,
  DisplayFunction -> Identity];

labelx = ColumnForm[{"(c) Arrays"}, Center];
labely = ColumnForm[{" ", "Expression Level"}, Center];
framex = Table[{a - 1, arraynames[[2, a]]}, {a, 1, arrays}];
framey = {-1, -0.5, 0, 0.5, 1};
coordinates = Table[{a - 1, eigengenes[[2, a]]}, {a, 1, arrays}];
points = Table[Point[coordinates[[a]]], {a, 1, arrays}];
line = Line[coordinates];
g = Show[
  {Graphics[{RGBColor[0, 0, 1], PointSize[0.022], points}],
  Graphics[{RGBColor[0, 0, 1], line}]},
  Frame -> True,
  FrameLabel -> {None, labely, labelx, None},
  GridLines -> {None, {{0, RGBColor[0, 0, 0]}}},
  FrameTicks -> {None, framey, framex, None},
  PlotRange -> {-1.05, 1.05},
  DisplayFunction -> Identity];
g = FullGraphics[g];
g[[1, 2]] = g[[1, 2]] /.
  Text[labely, {b_, c_}, {1., 0.}] ->
  Text[labely, {b - 5.4, c}, {0, 0}, {0, 1}];
g[[1, 2]] = g[[1, 2]] /.
  Text[labelx, {b_, c_}, {0., -1.}] ->
  Text[labelx, {b, c + 0.625}, {0, -1}, {1, 0}];
g[[1, 2]] = g[[1, 2]] /.
  Text[a_, {b_, c_}, {0., -1.}] ->
  Text[a, {b, c + 0.25}, {0, 0}, {0, 1}];
p2 = Show[g,
  AspectRatio -> 1.05,
  PlotRange -> All,
  DisplayFunction -> Identity];

```

```

graph = Plot[eigengenes3,
  {x, 1, arrays - 1},
  PlotStyle -> {RGBColor[1, 0, 0], Dashing[{0.03, 0.02}]},
  DisplayFunction -> Identity];
labelx = ColumnForm[{"(d) Arrays"}, Center];
labely = ColumnForm[{" ", "Expression Level"}, Center];
framex = Table[{a - 1, arraynames[[2, a]]}, {a, 1, arrays}];
framey = {-1, -0.5, 0, 0.5, 1};
coordinates = Table[{a - 1, eigengenes[[3, a]]}, {a, 1, arrays}];
points = Table[Point[coordinates[[a]]], {a, 1, arrays}];
line = Line[coordinates];
g = Show[
  {Graphics[{RGBColor[1, 0, 0], PointSize[0.022], points}],
  Graphics[{RGBColor[1, 0, 0], line}],
  graph,

  Graphics[{RGBColor[1, 0, 0], Text["- $\sqrt{\frac{2}{3T}} [\sin(\frac{2\pi t}{T} + \frac{\pi}{4}) + "$ , {6.5, 0.75}]}]},

  Graphics[{RGBColor[1, 0, 0], Text[" $\sin(\frac{4\pi t}{T})$ ]", {13.5, 0.5}]}]},

  Frame -> True,
  FrameLabel -> {None, labely, labelx, None},
  GridLines -> {None, {{0, RGBColor[0, 0, 0]}}},
  FrameTicks -> {None, framey, framex, None},
  PlotRange -> {-1.05, 1.05},
  DisplayFunction -> Identity];
g = FullGraphics[g];
g[[1, 2]] = g[[1, 2]] /.
  Text[labely, {b_, c_}, {1., 0.}] ->
  Text[labely, {b - 5.4, c}, {0, 0}, {0, 1}];
g[[1, 2]] = g[[1, 2]] /.
  Text[labelx, {b_, c_}, {0., -1.}] ->
  Text[labelx, {b, c + 0.625}, {0, -1}, {1, 0}];
g[[1, 2]] = g[[1, 2]] /.
  Text[a_, {b_, c_}, {0., -1.}] ->
  Text[a, {b, c + 0.25}, {0, 0}, {0, 1}];
p3 = Show[g,
  AspectRatio -> 1.05,
  PlotRange -> All,
  DisplayFunction -> Identity,
  DisplayFunction -> Identity];

```



```

graph = Plot[eigengenes4,
  {x, 1, arrays - 1},
  PlotStyle -> {RGBColor[0, 0, 1], Dashing[{0.03, 0.02}]},
  DisplayFunction -> Identity];
labelx = ColumnForm[{"(e) Arrays"}, Center];
labely = ColumnForm[{" ", " "}, Center];
framex = Table[{a - 1, arraynames[[2, a]]}, {a, 1, arrays}];
framey = {-1, -0.5, 0, 0.5, 1};
coordinates = Table[{a - 1, eigengenes[[4, a]]}, {a, 1, arrays}];
points = Table[Point[coordinates[[a]]], {a, 1, arrays}];
line = Line[coordinates];
g = Show[
  {Graphics[{RGBColor[0, 0, 1], PointSize[0.022], points}],
  Graphics[{RGBColor[0, 0, 1], line}],
  graph,

  Graphics[{{RGBColor[0, 0, 1], Text["- $\sqrt{\frac{2}{T}} \cos(\frac{4 \pi t}{T})$ ", {8.5, 0.7}]}]}],

  Frame -> True,
  FrameLabel -> {None, labely, labelx, None},
  GridLines -> {None, {{0, RGBColor[0, 0, 0]}}},
  FrameTicks -> {None, framey, framex, None},
  PlotRange -> {-1.05, 1.05},
  DisplayFunction -> Identity];
g = FullGraphics[g];
g[[1, 2]] = g[[1, 2]] /.
  Text[labely, {b_, c_}, {1., 0.}] ->
  Text[labely, {b - 5.4, c}, {0, 0}, {0, 1}];
g[[1, 2]] = g[[1, 2]] /.
  Text[labelx, {b_, c_}, {0., -1.}] ->
  Text[labelx, {b, c + 0.625}, {0, -1}, {1, 0}];
g[[1, 2]] = g[[1, 2]] /.
  Text[a_, {b_, c_}, {0., -1.}] ->
  Text[a, {b, c + 0.25}, {0, 0}, {0, 1}];
p4 = Show[g,
  AspectRatio -> 1.05,
  PlotRange -> All,
  DisplayFunction -> Identity];

```

```

graph = Plot[eigengenes5,
  {x, 1, arrays - 1},
  PlotStyle -> {RGBColor[0, 0.5, 0], Dashing[{0.03, 0.02}]},
  DisplayFunction -> Identity];
labelx = ColumnForm[{"(f) Arrays"}, Center];
labeledy = ColumnForm[{" ", " "}, Center];
framex = Table[{a - 1, arraynames[[2, a]]}, {a, 1, arrays}];
framey = {-1, -0.5, 0, 0.5, 1};
coordinates = Table[{a - 1, eigengenes[[5, a]]}, {a, 1, arrays}];
points = Table[Point[coordinates[[a]]], {a, 1, arrays}];
line = Line[coordinates];
g = Show[
  {Graphics[{RGBColor[0, 0.5, 0], PointSize[0.022], points}],
  Graphics[{RGBColor[0, 0.5, 0], line}],
  graph,

  Graphics[{RGBColor[0, 0.5, 0], Text[" $\sqrt{\frac{2}{T}} \cos(\frac{4\pi t}{T} + \frac{\pi}{4})$ ", {8.5, 0.7}]}]},
  Frame -> True,
  FrameLabel -> {None, labeledy, labelx, None},
  GridLines -> {None, {{0, RGBColor[0, 0, 0]}}},
  FrameTicks -> {None, framey, framex, None},
  PlotRange -> {-1.05, 1.05},
  DisplayFunction -> Identity];
g = FullGraphics[g];
g[[1, 2]] = g[[1, 2]] /.
  Text[labeledy, {b_, c_}, {1., 0.}] ->
  Text[labeledy, {b - 5.4, c}, {0, 0}, {0, 1}];
g[[1, 2]] = g[[1, 2]] /.
  Text[labelx, {b_, c_}, {0., -1.}] ->
  Text[labelx, {b, c + 0.625}, {0, -1}, {1, 0}];
g[[1, 2]] = g[[1, 2]] /.
  Text[a_, {b_, c_}, {0., -1.}] ->
  Text[a, {b, c + 0.25}, {0, 0}, {0, 1}];
p5 = Show[g,
  AspectRatio -> 1.05,
  PlotRange -> All,
  DisplayFunction -> Identity];

```

(\* Display Selected Eigengenes \*)

```
g3 = Show[{p2, p1},
  DisplayFunction -> Identity];
```

(\* Display Eigengenes, Fractions and Selected Eigengenes \*)

```
Show[GraphicsArray[{g1, g2, g3}],
  GraphicsSpacing -> -0.15];
```

(a) Arrays

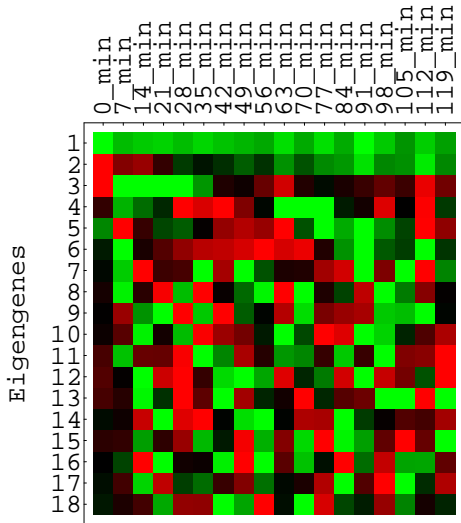

(b) Eigenexpression Fraction

$$d_1 = 0.17$$

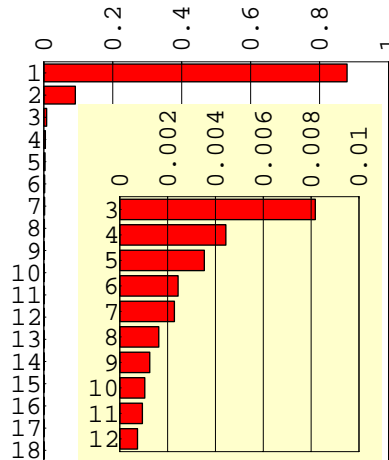

(c) Arrays

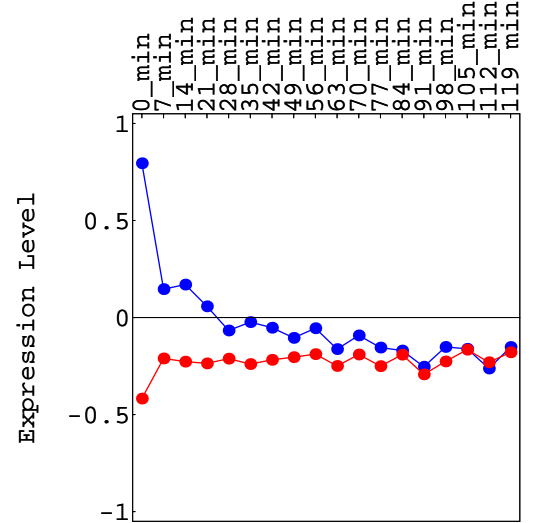

```
Show[GraphicsArray[{p3, p4, p5}],
  GraphicsSpacing -> -0.15];
```

(d) Arrays

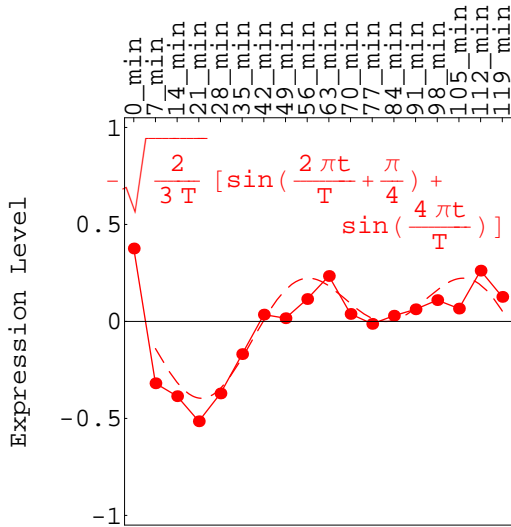

(e) Arrays

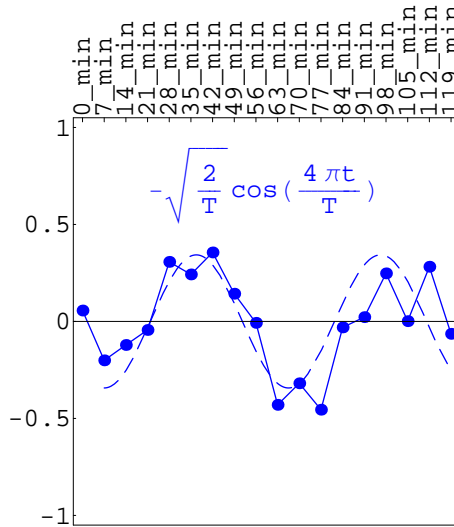

(f) Arrays

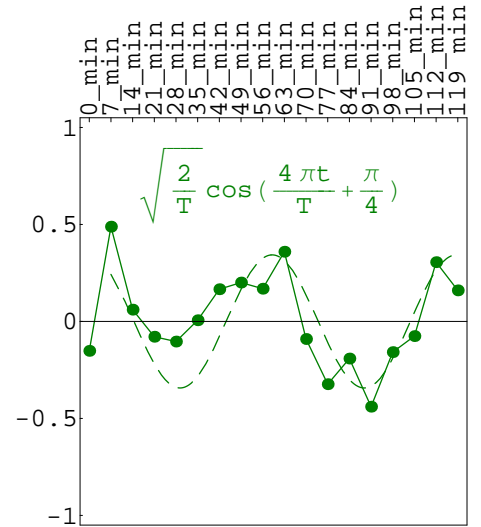

```
(* Choose Subset of Eigengenes for Estimation *)
```

```
eigengenes = TakeRows[eigengenes, {1, 5}];
```

```
(* Estimate Missing Data *)
```

```
Do[
  missingmatrix1[[a, locator1[[a, 1]]] =
    N[Round[Flatten[Dot[Dot[
      Transpose[Drop[
        Transpose[{missingmatrix1[[a]]}],
        {locator1[[a, 1]]}],
      PseudoInverse[Transpose[Drop[
        Transpose[eigengenes],
        {locator1[[a, 1]]}],
      eigengenes]][[locator1[[a, 1]]] * 100] / 100],
    {a, 1, numbers[[2]]}]

Do[Do[
  missingmatrix2[[a, locator2[[a, b]]] =
    N[Round[Flatten[Dot[Dot[
      Transpose[Drop[Drop[
        Transpose[{missingmatrix2[[a]]}],
        {locator2[[a, 2]]}, {locator2[[a, 1]]}],
      PseudoInverse[Transpose[Drop[Drop[
        Transpose[eigengenes],
        {locator2[[a, 2]]}, {locator2[[a, 1]]}],
      eigengenes]][[locator2[[a, b]]] * 100] / 100],
    {b, 1, 2}],
  {a, 1, numbers[[3]]}]

Do[Do[
  missingmatrix3[[a, locator3[[a, b]]] =
    N[Round[Flatten[Dot[Dot[
      Transpose[Drop[Drop[Drop[
        Transpose[{missingmatrix3[[a]]}],
        {locator3[[a, 3]]}, {locator3[[a, 2]]}, {locator3[[a, 1]]}],
      PseudoInverse[Transpose[Drop[Drop[Drop[
        Transpose[eigengenes],
        {locator3[[a, 3]]}, {locator3[[a, 2]]}, {locator3[[a, 1]]}],
      eigengenes]][[locator3[[a, b]]] * 100] / 100],
    {b, 1, 3}],
  {a, 1, numbers[[4]]}]

genenames = AppendColumns[
  fullgenenames,
  missinggenenames1,
  missinggenenames2,
  missinggenenames3];
matrix = AppendColumns[
  fullmatrix,
  missingmatrix1,
  missingmatrix2,
  missingmatrix3];
{genes, arrays} = Dimensions[matrix];
matrix1 = matrix;
genenames1 = genenames;
arraynames1 = arraynames;
{genes1, arrays1} = Dimensions[matrix1]

{4523, 18}
```

```
(* Examine Yeast Data After Missing Data Estimation *)
```

```
(* Calculate SVD *)
```

```
{eigenarrays, eigenexpressions, eigengenes} = SingularValues[matrix];  
eigengenes[[3]] = -eigengenes[[3]];  
eigengenes[[4]] = -eigengenes[[4]];  
eigengenes[[5]] = -eigengenes[[5]];  
eigenarrays = Transpose[eigenarrays];  
fractions = eigenexpressions^2 / Sum[eigenexpressions[[a]]^2, {a, 1, arrays}];  
entropy = -N[Sum[fractions[[a]] * Log[fractions[[a]]], {a, 1, arrays}] / Log[arrays];  
entropy = N[Round[100 * entropy] / 100]
```

```
0.17
```

```
(* Create Fractions Bar Charts Displays *)
```

```
fractions[[3]]
```

```
0.0089566
```

```
limit = 0.01;
```

```
Clear[gridx, framex, framey, sizes];  
gridx = Table[a, {a, 0, limit, N[limit/5]}];  
framex = gridx;  
sizes = Flatten[  
  Table[  
    Dimensions[  
      Characters[  
        ToString[framex[[a]]  
        ]], {a, 1, 6}];  
Do[  
  Do[framex[[a]] = StringJoin[ToString[framex[[a]]], " "],  
    {b, 1, 5 - sizes[[a]]},  
    {a, 1, 6}];  
framex = Table[{gridx[[a]], framex[[a]]}, {a, 1, 6}];  
gridx = Table[{gridx[[a]], RGBColor[0, 0, 0]}, {a, 1, 6}];  
framey = Table[{a + 1, arrays - a - 6}, {a, 0, 12 - 3}];  
table = Table[fractions[[arrays - a]], {a, 6, arrays - 3}];  
g = BarChart[table,  
  BarOrientation -> Horizontal,  
  PlotRange -> {{0, limit * 1.0001}, {0.5, 12 - 2 + 0.5}},  
  AspectRatio -> 1,  
  Axes -> False,  
  Frame -> True,  
  FrameTicks -> {None, framey, framex, None},  
  FrameLabel -> {None, None, None, None},  
  GridLines -> {gridx, None},  
  DisplayFunction -> Identity];  
g = FullGraphics[g];  
g[[1, 2]] = g[[1, 2]] /.  
  Text[a_, {b_, c_}, {0., -1.}] ->  
  Text[a, {b, c + 1.75}, {0, 0}, {0, 1}];  
g1 = Show[g,  
  AspectRatio -> 1.25,  
  PlotRange -> All,  
  DisplayFunction -> Identity];
```

```

gridx = Table[a, {a, 0, 1, 0.2}];
framex = gridx;
sizes = Flatten[
  Table[
    Dimensions[
      Characters[
        ToString[framex[[a]]
      ]], {a, 1, 6}]];
Do[
  Do[framex[[a]] = StringJoin[ToString[framex[[a]]], " ",
    {b, 1, size - sizes[[a]]},
    {a, 1, 6}];
framex = Table[{gridx[[a]], framex[[a]]}, {a, 1, 6}];
gridx = Table[{gridx[[a]], RGBColor[0, 0, 0]}, {a, 1, 6}];
framey = Table[{a + 1, arrays - a}, {a, 0, arrays - 1}];
labelx = ColumnForm[
  {"(b) Eigenexpression Fraction", StringJoin["di = ", ToString[entropy]], " "},
  Center];
g = BarChart[
  Table[fractions[[arrays - a]], {a, 0, arrays - 1}],
  BarOrientation -> Horizontal,
  PlotRange -> {{0, 1.0001}, {0.5, arrays + 0.5}},
  AspectRatio -> 1,
  Axes -> False,
  Frame -> True,
  FrameTicks -> {None, framey, framex, None},
  FrameLabel -> {None, None, labelx, None},
  GridLines -> {gridx, None},
  DisplayFunction -> Identity];
g = FullGraphics[g];
g[[1, 2]] = g[[1, 2]] /.
  Text[labelx, {b_, c_}, {0., -1.}] ->
  Text[labelx, {b, c + 3}, {0, -1}, {1, 0}];
g[[1, 2]] = g[[1, 2]] /.
  Text[a_, {b_, c_}, {0., -1.}] ->
  Text[a, {b, c + 2.7}, {0, 0}, {0, 1}];
g2 = Show[{g,
  Graphics[{RGBColor[1, 1, 0.8], Rectangle[{0.1, 0.6}, {0.98, 16.6}]},
  Graphics[{Rectangle[{0.1, 0.6}, {0.98, 16.6}, g1]}]},
  AspectRatio -> 1.35,
  PlotRange -> All,
  DisplayFunction -> Identity];

(* Create Eigengenes 2D Red & Green Raster Display *)

contrast = 3.5;
displaying = Table[
  If[contrast * eigengenes[[i, j]] > 0,
    If[contrast * eigengenes[[i, j]] < 1, {contrast * eigengenes[[i, j]], 0}, {1, 0}],
    If[contrast * eigengenes[[i, j]] > -1, {0, -contrast * eigengenes[[i, j]]}, {0, 1}]],
  {i, 1, arrays}, {j, 1, arrays}];
framex = Table[{a - 0.5, arraynames[[2, a]]}, {a, 1, arrays}];
framey = Table[{a + 1 - 0.5, arrays - a}, {a, 0, arrays - 1}];
labely = "Eigengenes";
labelx = ColumnForm[{"(a) Arrays", " ", " "}, Center];

```

```

g = Show[
  Graphics[
    RasterArray[
      Table[
        RGBColor[displaying[[i, j, 1]], displaying[[i, j, 2]], 0],
        {i, arrays, 1, -1}, {j, 1, arrays}]]],
  AspectRatio -> 1,
  Frame -> True,
  FrameTicks -> {None, framey, framex, None},
  FrameLabel -> {None, labely, labelx, None},
  DisplayFunction -> Identity];
g = FullGraphics[g];
g[[1, 2]] = g[[1, 2]] /.
  Text[labely, {b_, c_}, {1., 0.}] ->
  Text[labely, {b - 3, c}, {0, 0}, {0, 1}];
g[[1, 2]] = g[[1, 2]] /.
  Text[labelx, {b_, c_}, {0., -1.}] ->
  Text[labelx, {b, c + 3}, {0, -1}, {1, 0}];
g[[1, 2]] = g[[1, 2]] /.
  Text[a_, {b_, c_}, {0., -1.}] ->
  Text[a, {b, c + 2.7}, {0, 0}, {0, 1}];
g1 = Show[g,
  AspectRatio -> 1.05,
  PlotRange -> All,
  DisplayFunction -> Identity];

```

(\* Create Selected Eigengenes Graph Display \*)

```

eigengenes3 = Chop[TrigFit[Drop[eigengenes[[3]], {1}], 2, {x - 1, arrays - 1}], 0.15]
eigengenes4 = Chop[TrigFit[Drop[eigengenes[[4]], {1}], 2, {x - 1, arrays - 1}], 0.15]
eigengenes5 = Chop[TrigFit[Drop[eigengenes[[5]], {1}], 2, {x - 1, arrays - 1}], 0.15]

```

$$-0.221702 \sin\left[\frac{4}{17} \pi (-1 + x)\right]$$

$$-0.262143 \cos\left[\frac{4}{17} \pi (-1 + x)\right]$$

$$0.158409 \cos\left[\frac{4}{17} \pi (-1 + x)\right] - 0.194379 \sin\left[\frac{4}{17} \pi (-1 + x)\right]$$

```

eigengenes3 = -Sqrt[2/3/17.] * Sin[4 * Pi * (x - 1) / 17] - Sqrt[2/3/17.] * Sin[2 * Pi * (x - 1) / 17 + Pi / 4];
eigengenes4 = -Sqrt[2/17.] * Cos[4 * Pi * (x - 1) / 17];
eigengenes5 = Sqrt[2/17.] * Cos[4 * Pi * (x - 1) / 17 + Pi / 4];

```

```

labelx = ColumnForm[{"(c) Arrays"}, Center];
labely = ColumnForm[{" ", "Expression Level"}, Center];
framex = Table[{a - 1, arraynames[[2, a]]}, {a, 1, arrays}];
framey = {-1, -0.5, 0, 0.5, 1};
coordinates = Table[{a - 1, eigengenes[[1, a]]}, {a, 1, arrays}];
points = Table[Point[coordinates[[a]]], {a, 1, arrays}];
line = Line[coordinates];
g = Show[
  {Graphics[{RGBColor[1, 0, 0], PointSize[0.022], points}],
   Graphics[{RGBColor[1, 0, 0], line}]},
  Frame -> True,
  FrameLabel -> {None, labely, labelx, None},
  GridLines -> {None, {{0, RGBColor[0, 0, 0]}}},
  FrameTicks -> {None, framey, framex, None},
  PlotRange -> {-1.05, 1.05},
  DisplayFunction -> Identity];
g = FullGraphics[g];
g[[1, 2]] = g[[1, 2]] /.
  Text[labely, {b_, c_}, {1., 0.}] ->
  Text[labely, {b - 5.4, c}, {0, 0}, {0, 1}];
g[[1, 2]] = g[[1, 2]] /.
  Text[labelx, {b_, c_}, {0., -1.}] ->
  Text[labelx, {b, c + 0.625}, {0, -1}, {1, 0}];
g[[1, 2]] = g[[1, 2]] /.
  Text[a_, {b_, c_}, {0., -1.}] ->
  Text[a, {b, c + 0.25}, {0, 0}, {0, 1}];
p1 = Show[g,
  AspectRatio -> 1.05,
  PlotRange -> All,
  DisplayFunction -> Identity];

labelx = ColumnForm[{"(c) Arrays"}, Center];
labely = ColumnForm[{" ", "Expression Level"}, Center];
framex = Table[{a - 1, arraynames[[2, a]]}, {a, 1, arrays}];
framey = {-1, -0.5, 0, 0.5, 1};
coordinates = Table[{a - 1, eigengenes[[2, a]]}, {a, 1, arrays}];
points = Table[Point[coordinates[[a]]], {a, 1, arrays}];
line = Line[coordinates];
g = Show[
  {Graphics[{RGBColor[0, 0, 1], PointSize[0.022], points}],
   Graphics[{RGBColor[0, 0, 1], line}]},
  Frame -> True,
  FrameLabel -> {None, labely, labelx, None},
  GridLines -> {{17.5, RGBColor[0, 0, 0]}, {19.5, RGBColor[0, 0, 0]}}, {{0, RGBColor[0, 0, 0]}}},
  FrameTicks -> {None, framey, framex, None},
  PlotRange -> {-1.05, 1.05},
  DisplayFunction -> Identity];
g = FullGraphics[g];
g[[1, 2]] = g[[1, 2]] /.
  Text[labely, {b_, c_}, {1., 0.}] ->
  Text[labely, {b - 5.4, c}, {0, 0}, {0, 1}];
g[[1, 2]] = g[[1, 2]] /.
  Text[labelx, {b_, c_}, {0., -1.}] ->
  Text[labelx, {b, c + 0.625}, {0, -1}, {1, 0}];
g[[1, 2]] = g[[1, 2]] /.
  Text[a_, {b_, c_}, {0., -1.}] ->
  Text[a, {b, c + 0.25}, {0, 0}, {0, 1}];
p2 = Show[g,
  AspectRatio -> 1.05,
  PlotRange -> All,
  DisplayFunction -> Identity];

```



```

graph = Plot[eigengenes3,
  {x, 1, arrays - 1},
  PlotStyle -> {RGBColor[1, 0, 0], Dashing[{0.03, 0.02}]},
  DisplayFunction -> Identity];
labelx = ColumnForm[{"(d) Arrays"}, Center];
labely = ColumnForm[{" ", "Expression Level"}, Center];
framex = Table[{a - 1, arraynames[[2, a]]}, {a, 1, arrays}];
framey = {-1, -0.5, 0, 0.5, 1};
coordinates = Table[{a - 1, eigengenes[[3, a]]}, {a, 1, arrays}];
points = Table[Point[coordinates[[a]]], {a, 1, arrays}];
line = Line[coordinates];
g = Show[
  {Graphics[{RGBColor[1, 0, 0], PointSize[0.022], points}],
  Graphics[{RGBColor[1, 0, 0], line}],
  graph,

  Graphics[{RGBColor[1, 0, 0], Text["- $\sqrt{\frac{2}{3T}} [\sin(\frac{2\pi t}{T} + \frac{\pi}{4})]$  +", {6.5, 0.75}]}]},

  Graphics[{RGBColor[1, 0, 0], Text[" $\sin(\frac{4\pi t}{T})$ "], {13.5, 0.5}]}]}],

Frame -> True,
FrameLabel -> {None, labely, labelx, None},
GridLines -> {None, {{0, RGBColor[0, 0, 0]}}},
FrameTicks -> {None, framey, framex, None},
PlotRange -> {-1.05, 1.05},
DisplayFunction -> Identity];
g = FullGraphics[g];
g[[1, 2]] = g[[1, 2]] /.
  Text[labely, {b_, c_}, {1., 0.}] ->
  Text[labely, {b - 5.4, c}, {0, 0}, {0, 1}];
g[[1, 2]] = g[[1, 2]] /.
  Text[labelx, {b_, c_}, {0., -1.}] ->
  Text[labelx, {b, c + 0.625}, {0, -1}, {1, 0}];
g[[1, 2]] = g[[1, 2]] /.
  Text[a_, {b_, c_}, {0., -1.}] ->
  Text[a, {b, c + 0.25}, {0, 0}, {0, 1}];
p3 = Show[g,
  AspectRatio -> 1.05,
  PlotRange -> All,
  DisplayFunction -> Identity,
  DisplayFunction -> Identity];

```

```

graph = Plot[eigengenes4,
  {x, 1, arrays - 1},
  PlotStyle -> {RGBColor[0, 0, 1], Dashing[{0.03, 0.02}]},
  DisplayFunction -> Identity];
labelx = ColumnForm[{"(e) Arrays"}, Center];
labely = ColumnForm[{" ", " "}, Center];
framex = Table[{a - 1, arraynames[[2, a]]}, {a, 1, arrays}];
framey = {-1, -0.5, 0, 0.5, 1};
coordinates = Table[{a - 1, eigengenes[[4, a]]}, {a, 1, arrays}];
points = Table[Point[coordinates[[a]]], {a, 1, arrays}];
line = Line[coordinates];
g = Show[
  {Graphics[{RGBColor[0, 0, 1], PointSize[0.022], points}},
  Graphics[{RGBColor[0, 0, 1], line}},
  graph,

  Graphics[{{RGBColor[0, 0, 1], Text["- $\sqrt{\frac{2}{T}} \cos(\frac{4 \pi t}{T})$ ", {8.5, 0.7}]}]}],

  Frame -> True,
  FrameLabel -> {None, labely, labelx, None},
  GridLines -> {None, {{0, RGBColor[0, 0, 0]}}},
  FrameTicks -> {None, framey, framex, None},
  PlotRange -> {-1.05, 1.05},
  DisplayFunction -> Identity];
g = FullGraphics[g];
g[[1, 2]] = g[[1, 2]] /.
  Text[labely, {b_, c_}, {1., 0.}] ->
  Text[labely, {b - 5.4, c}, {0, 0}, {0, 1}];
g[[1, 2]] = g[[1, 2]] /.
  Text[labelx, {b_, c_}, {0., -1.}] ->
  Text[labelx, {b, c + 0.625}, {0, -1}, {1, 0}];
g[[1, 2]] = g[[1, 2]] /.
  Text[a_, {b_, c_}, {0., -1.}] ->
  Text[a, {b, c + 0.25}, {0, 0}, {0, 1}];
p4 = Show[g,
  AspectRatio -> 1.05,
  PlotRange -> All,
  DisplayFunction -> Identity];

```

```

graph = Plot[eigengenes5,
  {x, 1, arrays - 1},
  PlotStyle -> {RGBColor[0, 0.5, 0], Dashing[{0.03, 0.02}]},
  DisplayFunction -> Identity];
labelx = ColumnForm[{"(f) Arrays"}, Center];
labeledy = ColumnForm[{" ", " "}, Center];
framex = Table[{a - 1, arraynames[[2, a]]}, {a, 1, arrays}];
framey = {-1, -0.5, 0, 0.5, 1};
coordinates = Table[{a - 1, eigengenes[[5, a]]}, {a, 1, arrays}];
points = Table[Point[coordinates[[a]]], {a, 1, arrays}];
line = Line[coordinates];
g = Show[
  {Graphics[{RGBColor[0, 0.5, 0], PointSize[0.022], points}],
  Graphics[{RGBColor[0, 0.5, 0], line}],
  graph,

  Graphics[{{RGBColor[0, 0.5, 0], Text[" $\sqrt{\frac{2}{T}} \cos(\frac{4\pi t}{T} + \frac{\pi}{4})$ ", {8.5, 0.7}]}]}],

  Frame -> True,
  FrameLabel -> {None, labeledy, labelx, None},
  GridLines -> {None, {{0, RGBColor[0, 0, 0]}}},
  FrameTicks -> {None, framey, framex, None},
  PlotRange -> {-1.05, 1.05},
  DisplayFunction -> Identity];
g = FullGraphics[g];
g[[1, 2]] = g[[1, 2]] /.
  Text[labeledy, {b_, c_}, {1., 0.}] ->
  Text[labeledy, {b - 5.4, c}, {0, 0}, {0, 1}];
g[[1, 2]] = g[[1, 2]] /.
  Text[labelx, {b_, c_}, {0., -1.}] ->
  Text[labelx, {b, c + 0.625}, {0, -1}, {1, 0}];
g[[1, 2]] = g[[1, 2]] /.
  Text[a_, {b_, c_}, {0., -1.}] ->
  Text[a, {b, c + 0.25}, {0, 0}, {0, 1}];
p5 = Show[g,
  AspectRatio -> 1.05,
  PlotRange -> All,
  DisplayFunction -> Identity];

```

(\* Display Selected Eigengenes \*)

```
g3 = Show[{p2, p1},
  DisplayFunction -> Identity];
```

(\* Display Eigengenes, Fractions and Selected Eigengenes \*)

```
Show[GraphicsArray[{g1, g2, g3}],
  GraphicsSpacing -> -0.15];
```

(a) Arrays

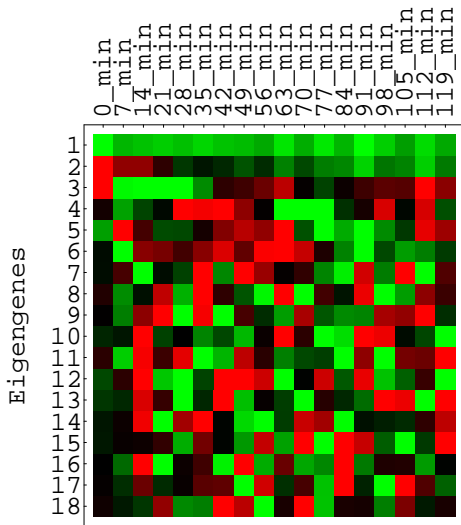

(b) Eigenexpression Fraction

$d_1 = 0.17$

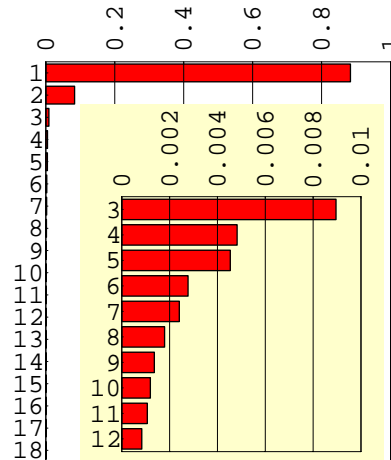

(c) Arrays

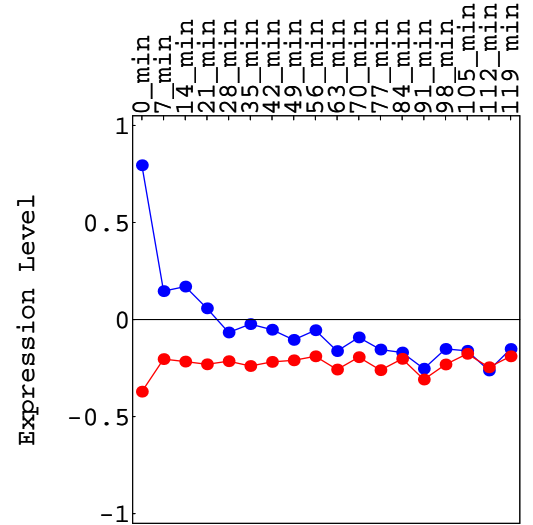

```
Show[GraphicsArray[{p3, p4, p5}],
  GraphicsSpacing -> -0.15];
```

(d) Arrays

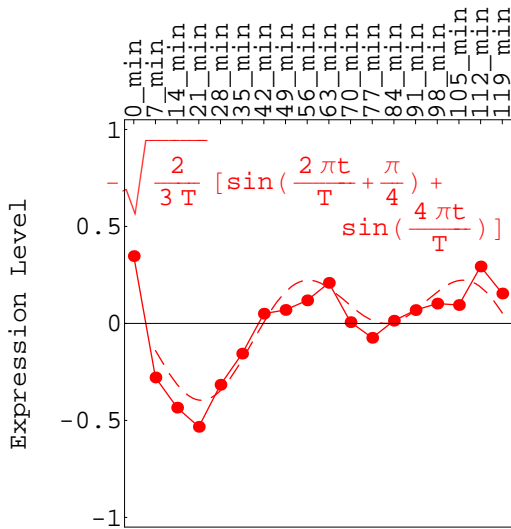

(e) Arrays

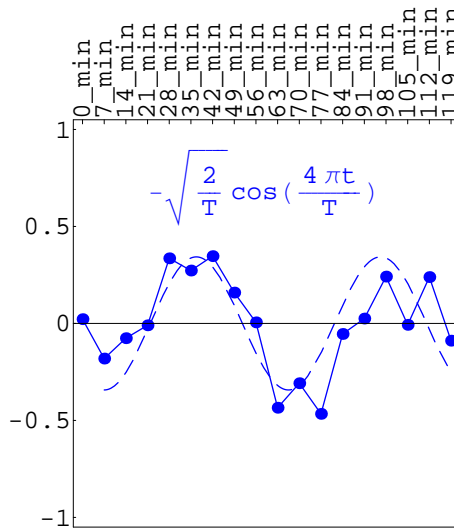

(f) Arrays

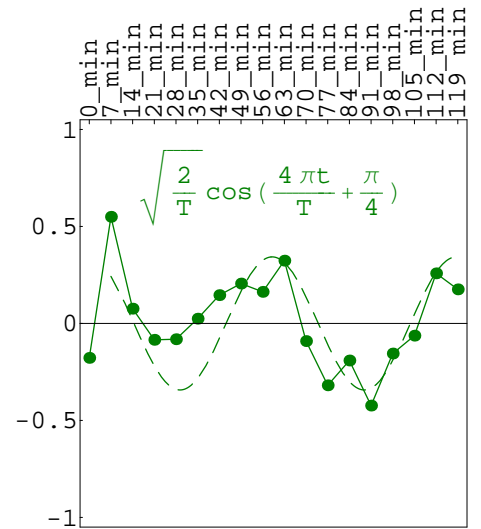

```
(* Read Human Data *)
```

```
stream = StringJoin[name, ":Desktop Folder:PNAS Data:Human.txt"];  
matrix = ReadList[stream, Word, RecordLists -> True, NullWords -> True];  
{genes, arrays} = Dimensions[matrix] - {2, 5}  
Clear[stream];
```

```
{12056, 18}
```

```
genenames = TakeRows [  
  TakeColumns[matrix, {1, 5}],  
  {3, genes + 2}];  
arraynames = TakeColumns [  
  TakeRows[matrix, {1, 2}],  
  {6, arrays + 5}];  
matrix = TakeColumns [  
  TakeRows[matrix, {3, genes + 2}],  
  {6, arrays + 5}];  
matrix = ToExpression[matrix];  
  
sizes = Flatten [  
  Table [  
    Dimensions [  
      Characters [  
        ToString[arraynames[[2, a]]  
        ]], {a, 1, arrays}]]];  
size = Sort[sizes, OrderedQ[{{#2, #1}} &]][[1]];  
Do [  
  Do[arraynames[[2, a]] = StringJoin[ToString[arraynames[[2, a]]], " "],  
    {b, 1, size - sizes[[a]]},  
    {a, 1, arrays}];
```

```
(* Estimate Missing Human Data Using SVD *)
```

```
(* Count Null Data *)
```

```
counter = Table[Dimensions[Position[matrix[[a]], Null]][[1]], {a, 1, genes}];
```

```
(* Locate Gene Position of Null Data *)
```

```
Clear[positions];  
positions = Table[0, {a, 1, arrays + 1}];  
Do [  
  positions[[a]] = Flatten [  
    Position[Flatten[counter], a - 1],  
    {a, 1, arrays + 1}];  
numbers = Flatten [  
  Table [  
    Dimensions[positions[[a]]],  
    {a, 1, Round[arrays * 0.2]}];
```

```
(* Create Display Of Gene Position Of Null Data *)
```

```
framex = Table[{a, a - 1}, {a, 1, Round[arrays * 0.2]}];  
framey = {1000, 2000, 3000, 4000, 5000};  
labelx = ColumnForm[{"Number of Arrays"}, Center];  
labely = ColumnForm[{"Number of Genes"}, Center];  
g = BarChart[numbers,  
  Frame -> True,  
  Axes -> False,  
  FrameLabel -> {labelx, labely, None, None},  
  FrameTicks -> {framex, framey, None, None},  
  GridLines -> {None, None},  
  PlotRange -> {{0.5, Round[arrays * 0.2] + 0.5}, {0, 5000}},  
  DisplayFunction -> Identity];  
g = FullGraphics[g];  
g[[1, 2]] = g[[1, 2]] /.  
  Text[labely, {b_, c_}, {1., 0.}] ->  
  Text[labely, {b - 0.75, c}, {0, 0}, {0, 1}];  
g[[1, 2]] = g[[1, 2]] /.  
  Text[labelx, {b_, c_}, {0., 1.}] ->  
  Text[labelx, {b, c - 600}, {0, 1}, {1, 0}];  
g[[1, 2]] = g[[1, 2]] /.  
  Text[a_, {b_, c_}, {0., 1.}] ->  
  Text[a, {b, c - 400}, {0, 0}, {0, 1}];
```

```
(* Display Gene Position Of Null Data *)
```

```
Show[g, PlotRange -> All];
```

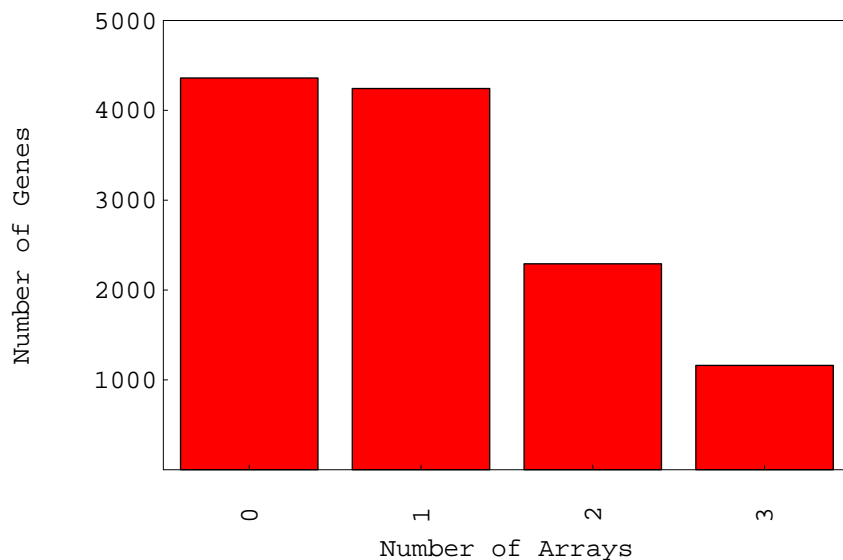

```
(* Select Genes by Number of Missing Data Points *)
```

```
matrix = AppendRows[Table[{counter[[a]]}, {a, 1, genes}], genenames, matrix];  
matrix = Sort[matrix, OrderedQ[{#1, #2} &];  
fullgenenames = TakeColumns[  
  TakeRows[matrix, {1, numbers[[1]]}],  
  {2, 6}];  
fullmatrix = TakeColumns[  
  TakeRows[matrix, {1, numbers[[1]]}],  
  {7, arrays + 6}];  
missinggenenames1 = TakeColumns[  
  TakeRows[matrix, {numbers[[1]] + 1, numbers[[1]] + numbers[[2]]}],  
  {2, 6}];  
missingmatrix1 = TakeColumns[  
  TakeRows[matrix, {numbers[[1]] + 1, numbers[[1]] + numbers[[2]]}],  
  {7, arrays + 6}];  
missinggenenames2 = TakeColumns[  
  TakeRows[matrix,  
    {numbers[[1]] + numbers[[2]] + 1,  
    numbers[[1]] + numbers[[2]] + numbers[[3]]}],  
  {2, 6}];  
missingmatrix2 = TakeColumns[  
  TakeRows[matrix,  
    {numbers[[1]] + numbers[[2]] + 1,  
    numbers[[1]] + numbers[[2]] + numbers[[3]]}],  
  {7, arrays + 6}];  
missinggenenames3 = TakeColumns[  
  TakeRows[matrix,  
    {numbers[[1]] + numbers[[2]] + numbers[[3]] + 1,  
    numbers[[1]] + numbers[[2]] + numbers[[3]] + numbers[[4]]}],  
  {2, 6}];  
missingmatrix3 = TakeColumns[  
  TakeRows[matrix,  
    {numbers[[1]] + numbers[[2]] + numbers[[3]] + 1,  
    numbers[[1]] + numbers[[2]] + numbers[[3]] + numbers[[4]]}],  
  {7, arrays + 6}];
```

```
(* Locate Array Position of Null Data *)
```

```
locator1 = Table[0, {numbers[[2]]};  
Do[  
  locator1[[a]] = locator1[[a]] + Flatten[Position[missingmatrix1[[a]], Null]],  
  {a, 1, numbers[[2]]};  
locator2 = Table[0, {numbers[[3]]};  
Do[  
  locator2[[a]] = locator2[[a]] + Flatten[Position[missingmatrix2[[a]], Null]],  
  {a, 1, numbers[[3]]};  
locator3 = Table[0, {numbers[[4]]};  
Do[  
  locator3[[a]] = locator3[[a]] + Flatten[Position[missingmatrix3[[a]], Null]],  
  {a, 1, numbers[[4]]};
```

```
(* Sort Raw Elutriation Data According to the Position of Missing Data Points for Each Gene *)
```

```
missingmatrix1 = AppendRows[locator1, missinggenenames1, missingmatrix1];  
missingmatrix1 = Sort[missingmatrix1, OrderedQ[{{#1, #2}} &];  
locator1 = TakeColumns[missingmatrix1, {1, 1}];  
missinggenenames1 = TakeColumns[missingmatrix1, {2, 6}];  
missingmatrix1 = TakeColumns[missingmatrix1, {7, arrays + 6}];  
missingmatrix2 = AppendRows[locator2, missinggenenames2, missingmatrix2];  
missingmatrix2 = Sort[missingmatrix2, OrderedQ[{{#1, #2}} &];  
locator2 = TakeColumns[missingmatrix2, {1, 2}];  
missinggenenames2 = TakeColumns[missingmatrix2, {3, 7}];  
missingmatrix2 = TakeColumns[missingmatrix2, {8, arrays + 7}];  
missingmatrix3 = AppendRows[locator3, missinggenenames3, missingmatrix3];  
missingmatrix3 = Sort[missingmatrix3, OrderedQ[{{#1, #2}} &];  
locator3 = TakeColumns[missingmatrix3, {1, 3}];  
missinggenenames3 = TakeColumns[missingmatrix3, {4, 8}];  
missingmatrix3 = TakeColumns[missingmatrix3, {9, arrays + 8}];
```

```
(* Examine Subset of Genes with Full Data *)
```

```
(* Calculate SVD *)
```

```
{eigenarrays, eigenexpressions, eigengenes} = SingularValues[fullmatrix];  
eigenarrays = Transpose[eigenarrays];  
fractions = eigenexpressions^2 / Sum[eigenexpressions[[a]]^2, {a, 1, arrays}];  
entropy = -N[Sum[fractions[[a]] * Log[fractions[[a]]], {a, 1, arrays}] / Log[arrays];  
entropy = N[Round[100 * entropy] / 100]
```

```
0.04
```

```
(* Create Fractions Bar Charts Displays *)
```

```
fractions[[2]]
```

```
0.00573569
```

```
limit = 0.008;
```

```
Clear[gridx, framex, framey, sizes];  
gridx = Table[a, {a, 0, limit, N[limit/4]}];  
framex = gridx;  
sizes = Flatten[  
  Table[  
    Dimensions[  
      Characters[  
        ToString[framex[[a]]  
      ]], {a, 1, 5}];  
Do[  
  Do[framex[[a]] = StringJoin[ToString[framex[[a]]], " "],  
    {b, 1, 5 - sizes[[a]]},  
    {a, 1, 5}];  
framex = Table[{gridx[[a]], framex[[a]]}, {a, 1, 5};  
gridx = Table[{gridx[[a]], RGBColor[0, 0, 0]}, {a, 1, 5};  
framey = Table[{a + 1, arrays - a - 8}, {a, 0, 10 - 2}];  
table = Table[fractions[[arrays - a]], {a, 8, arrays - 2}];
```



```

g = BarChart[table,
  BarOrientation -> Horizontal,
  PlotRange -> {{0, limit * 1.0001}, {0.5, 10 - 1 + 0.5}},
  AspectRatio -> 1,
  Axes -> False,
  Frame -> True,
  FrameTicks -> {None, framey, framex, None},
  FrameLabel -> {None, None, None, None},
  GridLines -> {gridx, None},
  DisplayFunction -> Identity];
g = FullGraphics[g];
g[[1, 2]] = g[[1, 2]] /.
  Text[a_, {b_, c_}, {0., -1.}] ->
  Text[a, {b, c + 1.75}, {0, 0}, {0, 1}];
g1 = Show[g,
  AspectRatio -> 1.25,
  PlotRange -> All,
  DisplayFunction -> Identity];

gridx = Table[a, {a, 0, 1, 0.2}];
framex = gridx;
sizes = Flatten[
  Table[
    Dimensions[
      Characters[
        ToString[framex[[a]]
      ]], {a, 1, 6}]];
Do[
  Do[framex[[a]] = StringJoin[ToString[framex[[a]]], " "],
  {b, 1, size - sizes[[a]]}],
  {a, 1, 6}];
framex = Table[{gridx[[a]], framex[[a]]}, {a, 1, 6}];
gridx = Table[{gridx[[a]], RGBColor[0, 0, 0]}, {a, 1, 6}];
framey = Table[{a + 1, arrays - a}, {a, 0, arrays - 1}];
labelx = ColumnForm[
  {"(b) Eigenexpression Fraction", StringJoin["d2 = ", ToString[entropy]], " "},
  Center];
g = BarChart[
  Table[fractions[[arrays - a]], {a, 0, arrays - 1}],
  BarOrientation -> Horizontal,
  PlotRange -> {{0, 1.0001}, {0.5, arrays + 0.5}},
  AspectRatio -> 1,
  Axes -> False,
  Frame -> True,
  FrameTicks -> {None, framey, framex, None},
  FrameLabel -> {None, None, labelx, None},
  GridLines -> {gridx, None},
  DisplayFunction -> Identity];
g = FullGraphics[g];
g[[1, 2]] = g[[1, 2]] /.
  Text[labelx, {b_, c_}, {0., -1.}] ->
  Text[labelx, {b, c + 3}, {0, -1}, {1, 0}];
g[[1, 2]] = g[[1, 2]] /.
  Text[a_, {b_, c_}, {0., -1.}] ->
  Text[a, {b, c + 2.7}, {0, 0}, {0, 1}];
g2 = Show[{g,
  Graphics[{RGBColor[1, 1, 0.8], Rectangle[{0.1, 0.6}, {0.98, 16.6}]}],
  Graphics[{Rectangle[{0.1, 0.6}, {0.98, 16.6}, g1}]}],
  AspectRatio -> 1.35,
  PlotRange -> All,
  DisplayFunction -> Identity];

```

(\* Create Eigengenes 2D Red & Green Raster Display \*)

```

contrast = 3.5;
displaying = Table[
  If[contrast * eigengenes[[i, j]] > 0,
    If[contrast * eigengenes[[i, j]] < 1, {contrast * eigengenes[[i, j]], 0}, {1, 0}],
    If[contrast * eigengenes[[i, j]] > -1, {0, -contrast * eigengenes[[i, j]]}, {0, 1}]],
  {i, 1, arrays}, {j, 1, arrays}];
framex = Table[{a - 0.5, arraynames[[2, a]]}, {a, 1, arrays}];
framey = Table[{a + 1 - 0.5, arrays - a}, {a, 0, arrays - 1}];
labely = "Eigengenes";
labelx = ColumnForm[{"(a) Arrays", " ", " "}, Center];
g = Show[
  Graphics[
    RasterArray[
      Table[
        RGBColor[displaying[[i, j, 1]], displaying[[i, j, 2]], 0],
        {i, arrays, 1, -1}, {j, 1, arrays}]]],
  AspectRatio -> 1,
  Frame -> True,
  FrameTicks -> {None, framey, framex, None},
  FrameLabel -> {None, labely, labelx, None},
  DisplayFunction -> Identity];
g = FullGraphics[g];
g[[1, 2]] = g[[1, 2]] /.
  Text[labely, {b_, c_}, {1., 0.}] ->
  Text[labely, {b - 3, c}, {0, 0}, {0, 1}];
g[[1, 2]] = g[[1, 2]] /.
  Text[labelx, {b_, c_}, {0., -1.}] ->
  Text[labelx, {b, c + 3}, {0, -1}, {1, 0}];
g[[1, 2]] = g[[1, 2]] /.
  Text[a_, {b_, c_}, {0., -1.}] ->
  Text[a, {b, c + 2.7}, {0, 0}, {0, 1}];
g1 = Show[g,
  AspectRatio -> 1.05,
  PlotRange -> All,
  DisplayFunction -> Identity];

```

(\* Create Selected Eigengenes Graph Display \*)

```

eigengenes4 = Chop[TrigFit[eigengenes[[4]], 2, {5/4 * (x - 1), arrays - 1}], 0.1]
eigengenes5 = Chop[TrigFit[eigengenes[[5]], 2, {5/4 * (x - 1), arrays - 1}], 0.175]

0.146569 Sin[ $\frac{5}{17} \pi (-1 + x)$ ]
-0.228962 Cos[ $\frac{5}{17} \pi (-1 + x)$ ]

eigengenes4 = Sqrt[2/17.] * Sin[5 * Pi * (x - 1) / 17];
eigengenes5 = -Sqrt[2/17.] * Cos[5 * Pi * (x - 1) / 17];

```

```

labelx = ColumnForm[{"(c) Arrays"}, Center];
labely = ColumnForm[{" ", "Expression Level"}, Center];
framex = Table[{a - 1, arraynames[[2, a]]}, {a, 1, arrays}];
framey = {-1, -0.5, 0, 0.5, 1};
coordinates = Table[{a - 1, eigengenes[[1, a]]}, {a, 1, arrays}];
points = Table[Point[coordinates[[a]]], {a, 1, arrays}];
line = Line[coordinates];
g = Show[
  {Graphics[{RGBColor[1, 0, 0], PointSize[0.022], points}],
   Graphics[{RGBColor[1, 0, 0], line}]},
  Frame -> True,
  FrameLabel -> {None, labely, labelx, None},
  GridLines -> {None, {{0, RGBColor[0, 0, 0]}}},
  FrameTicks -> {None, framey, framex, None},
  PlotRange -> {-1.05, 1.05},
  DisplayFunction -> Identity];
g = FullGraphics[g];
g[[1, 2]] = g[[1, 2]] /.
  Text[labely, {b_, c_}, {1., 0.}] ->
  Text[labely, {b - 5.4, c}, {0, 0}, {0, 1}];
g[[1, 2]] = g[[1, 2]] /.
  Text[labelx, {b_, c_}, {0., -1.}] ->
  Text[labelx, {b, c + 0.625}, {0, -1}, {1, 0}];
g[[1, 2]] = g[[1, 2]] /.
  Text[a_, {b_, c_}, {0., -1.}] ->
  Text[a, {b, c + 0.25}, {0, 0}, {0, 1}];
p1 = Show[g,
  AspectRatio -> 1.05,
  PlotRange -> All,
  DisplayFunction -> Identity];

labelx = ColumnForm[{"(d) Arrays"}, Center];
labely = ColumnForm[{" ", "Expression Level"}, Center];
framex = Table[{a - 1, arraynames[[2, a]]}, {a, 1, arrays}];
framey = {-1, -0.5, 0, 0.5, 1};
coordinates = Table[{a - 1, eigengenes[[2, a]]}, {a, 1, arrays}];
points = Table[Point[coordinates[[a]]], {a, 1, arrays}];
line = Line[coordinates];
g = Show[
  {Graphics[{RGBColor[1, 0, 0], PointSize[0.022], points}],
   Graphics[{RGBColor[1, 0, 0], line}]},
  Frame -> True,
  FrameLabel -> {None, labely, labelx, None},
  GridLines -> {None, {{0, RGBColor[0, 0, 0]}}},
  FrameTicks -> {None, framey, framex, None},
  PlotRange -> {-1.05, 1.05},
  DisplayFunction -> Identity];
g = FullGraphics[g];
g[[1, 2]] = g[[1, 2]] /.
  Text[labely, {b_, c_}, {1., 0.}] ->
  Text[labely, {b - 5.4, c}, {0, 0}, {0, 1}];
g[[1, 2]] = g[[1, 2]] /.
  Text[labelx, {b_, c_}, {0., -1.}] ->
  Text[labelx, {b, c + 0.625}, {0, -1}, {1, 0}];
g[[1, 2]] = g[[1, 2]] /.
  Text[a_, {b_, c_}, {0., -1.}] ->
  Text[a, {b, c + 0.25}, {0, 0}, {0, 1}];
p2 = Show[g,
  AspectRatio -> 1.05,
  PlotRange -> All,
  DisplayFunction -> Identity];

```

```

labelx = ColumnForm[{"(d) Arrays"}, Center];
labely = ColumnForm[{" ", "Expression Level"}, Center];
framex = Table[{a - 1, arraynames[[2, a]]}, {a, 1, arrays}];
framey = {-1, -0.5, 0, 0.5, 1};
coordinates = Table[{a - 1, eigengenes[[3, a]]}, {a, 1, arrays}];
points = Table[Point[coordinates[[a]]], {a, 1, arrays}];
line = Line[coordinates];
g = Show[
  {Graphics[{RGBColor[0, 0, 1], PointSize[0.022], points}],
   Graphics[{RGBColor[0, 0, 1], line}]},
  Frame -> True,
  FrameLabel -> {None, labely, labelx, None},
  GridLines -> {None, {{0, RGBColor[0, 0, 0]}}},
  FrameTicks -> {None, framey, framex, None},
  PlotRange -> {-1.05, 1.05},
  DisplayFunction -> Identity];
g = FullGraphics[g];
g[[1, 2]] = g[[1, 2]] /.
  Text[labely, {b_, c_}, {1., 0.}] ->
  Text[labely, {b - 5.4, c}, {0, 0}, {0, 1}];
g[[1, 2]] = g[[1, 2]] /.
  Text[labelx, {b_, c_}, {0., -1.}] ->
  Text[labelx, {b, c + 0.625}, {0, -1}, {1, 0}];
g[[1, 2]] = g[[1, 2]] /.
  Text[a_, {b_, c_}, {0., -1.}] ->
  Text[a, {b, c + 0.25}, {0, 0}, {0, 1}];
p3 = Show[g,
  AspectRatio -> 1.05,
  PlotRange -> All,
  DisplayFunction -> Identity];

```

```

graph = Plot[eigengenes4,
  {x, 0, arrays - 1},
  PlotStyle -> {RGBColor[1, 0, 0], Dashing[{0.03, 0.02}]},
  DisplayFunction -> Identity];
labelx = ColumnForm[{"(e) Arrays"}, Center];
labeledy = ColumnForm[{" ", " "}, Center];
framex = Table[{a - 1, arraynames[[2, a]]}, {a, 1, arrays}];
framey = {-1, -0.5, 0, 0.5, 1};
coordinates = Table[{a - 1, eigengenes[[4, a]]}, {a, 1, arrays}];
points = Table[Point[coordinates[[a]]], {a, 1, arrays}];
line = Line[coordinates];
g = Show[
  {Graphics[{RGBColor[1, 0, 0], PointSize[0.022], points}],
  Graphics[{RGBColor[1, 0, 0], line}],
  graph,

  Graphics[{{RGBColor[1, 0, 0], Text[" $\sqrt{\frac{2}{T}} \sin(\frac{5\pi t}{T})$ ", {8.5, 0.7}]}]}],
  Frame -> True,
  FrameLabel -> {None, labeledy, labelx, None},
  GridLines -> {None, {{0, RGBColor[0, 0, 0]}}},
  FrameTicks -> {None, framey, framex, None},
  PlotRange -> {-1.05, 1.05},
  DisplayFunction -> Identity];
g = FullGraphics[g];
g[[1, 2]] = g[[1, 2]] /.
  Text[labeledy, {b_, c_}, {1., 0.}] ->
  Text[labeledy, {b - 5.4, c}, {0, 0}, {0, 1}];
g[[1, 2]] = g[[1, 2]] /.
  Text[labelx, {b_, c_}, {0., -1.}] ->
  Text[labelx, {b, c + 0.625}, {0, -1}, {1, 0}];
g[[1, 2]] = g[[1, 2]] /.
  Text[a_, {b_, c_}, {0., -1.}] ->
  Text[a, {b, c + 0.25}, {0, 0}, {0, 1}];
p4 = Show[g,
  AspectRatio -> 1.05,
  PlotRange -> All,
  DisplayFunction -> Identity];

```

```

graph = Plot[eigengenes5,
  {x, 0, arrays - 1},
  PlotStyle -> {RGBColor[0, 0, 1], Dashing[{0.03, 0.02}]},
  DisplayFunction -> Identity];
labelx = ColumnForm[{"(e) Arrays"}, Center];
labely = ColumnForm[{" ", " "}, Center];
framex = Table[{a - 1, arraynames[[2, a]]}, {a, 1, arrays}];
framey = {-1, -0.5, 0, 0.5, 1};
coordinates = Table[{a - 1, eigengenes[[5, a]]}, {a, 1, arrays}];
points = Table[Point[coordinates[[a]]], {a, 1, arrays}];
line = Line[coordinates];
g = Show[
  {Graphics[{RGBColor[0, 0, 1], PointSize[0.022], points}],
  Graphics[{RGBColor[0, 0, 1], line}],
  graph,

  Graphics[{{RGBColor[0, 0, 1], Text[" $\sqrt{\frac{2}{T}} \cos(\frac{5\pi t}{T})$ ", {8.5, -0.7}]}]}],
  Frame -> True,
  FrameLabel -> {None, labely, labelx, None},
  GridLines -> {None, {{0, RGBColor[0, 0, 0]}}},
  FrameTicks -> {None, framey, framex, None},
  PlotRange -> {-1.05, 1.05},
  DisplayFunction -> Identity];
g = FullGraphics[g];
g[[1, 2]] = g[[1, 2]] /.
  Text[labely, {b_, c_}, {1., 0.}] ->
  Text[labely, {b - 5.4, c}, {0, 0}, {0, 1}];
g[[1, 2]] = g[[1, 2]] /.
  Text[labelx, {b_, c_}, {0., -1.}] ->
  Text[labelx, {b, c + 0.625}, {0, -1}, {1, 0}];
g[[1, 2]] = g[[1, 2]] /.
  Text[a_, {b_, c_}, {0., -1.}] ->
  Text[a, {b, c + 0.25}, {0, 0}, {0, 1}];
p5 = Show[g,
  AspectRatio -> 1.05,
  PlotRange -> All,
  DisplayFunction -> Identity];

```

(\* Display Selected Eigengenes \*)

```
g3 = Show[{p3, p2},
  DisplayFunction -> Identity];
g4 = Show[{p5, p4},
  DisplayFunction -> Identity];
```

(\* Display Eigengenes, Fractions and Selected Eigengenes \*)

```
Show[GraphicsArray[{g1, g2, p1}],
  GraphicsSpacing -> -0.15];
```

(a) Arrays

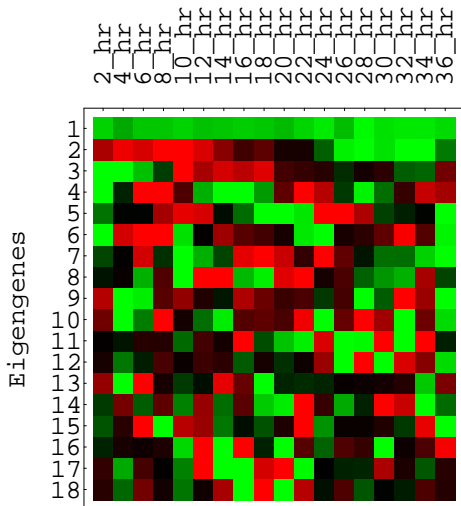

(b) Eigenexpression Fraction

$$d_2^2 = 0.04$$

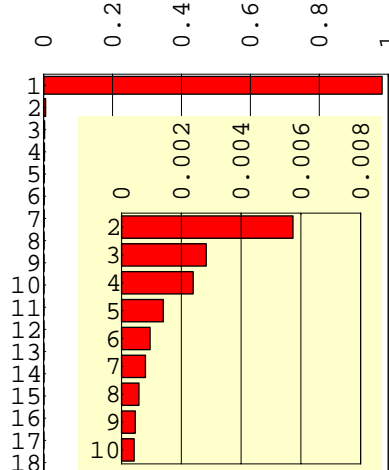

(c) Arrays

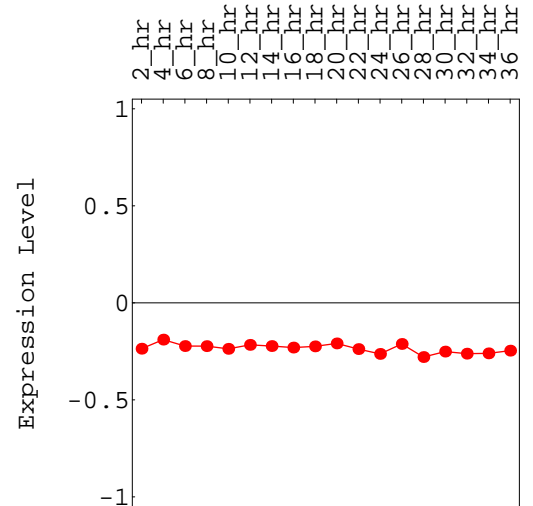

```
Show[GraphicsArray[{g3, g4}],
  GraphicsSpacing -> -0.15];
```

(d) Arrays

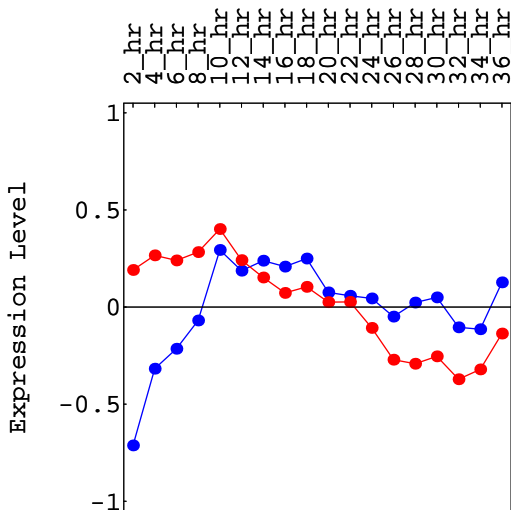

(e) Arrays

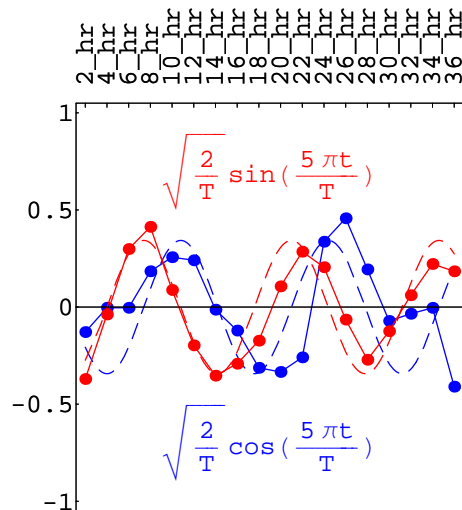

```
(* Choose Subset of Eigengenes for Estimation *)
```

```
eigengenes = TakeRows[eigengenes, {1, 5}];
```

```
(* Estimate Missing Data *)
```

```
Do[
  missingmatrix1[[a, locator1[[a, 1]]] =
    N[Round[Flatten[Dot[Dot[
      Transpose[Drop[
        Transpose[{missingmatrix1[[a]]}],
        {locator1[[a, 1]]}],
      PseudoInverse[Transpose[Drop[
        Transpose[eigengenes],
        {locator1[[a, 1]]}],
      eigengenes]][[locator1[[a, 1]]] * 100] / 100],
    {a, 1, numbers[[2]]}]
Do[Do[
  missingmatrix2[[a, locator2[[a, b]]] =
    N[Round[Flatten[Dot[Dot[
      Transpose[Drop[Drop[
        Transpose[{missingmatrix2[[a]]}],
        {locator2[[a, 2]]}, {locator2[[a, 1]]}],
      PseudoInverse[Transpose[Drop[Drop[
        Transpose[eigengenes],
        {locator2[[a, 2]]}, {locator2[[a, 1]]}],
      eigengenes]][[locator2[[a, b]]] * 100] / 100],
    {b, 1, 2}],
    {a, 1, numbers[[3]]}]
Do[Do[
  missingmatrix3[[a, locator3[[a, b]]] =
    N[Round[Flatten[Dot[Dot[
      Transpose[Drop[Drop[Drop[
        Transpose[{missingmatrix3[[a]]}],
        {locator3[[a, 3]]}, {locator3[[a, 2]]}, {locator3[[a, 1]]}],
      PseudoInverse[Transpose[Drop[Drop[Drop[
        Transpose[eigengenes],
        {locator3[[a, 3]]}, {locator3[[a, 2]]}, {locator3[[a, 1]]}],
      eigengenes]][[locator3[[a, b]]] * 100] / 100],
    {b, 1, 3}],
    {a, 1, numbers[[4]]}]
genenames = AppendColumns[
  fullgenenames,
  missinggenenames1,
  missinggenenames2,
  missinggenenames3];
matrix = AppendColumns[
  fullmatrix,
  missingmatrix1,
  missingmatrix2,
  missingmatrix3];
{genes, arrays} = Dimensions[matrix];
matrix2 = matrix;
genenames2 = genenames;
arraynames2 = arraynames;
{genes2, arrays2} = Dimensions[matrix2]
{12056, 18}
```



```
(* Examine Human Data After Missing Data Estimation *)
```

```
(* Calculate SVD *)
```

```
{eigenarrays, eigenexpressions, eigengenes} = SingularValues[matrix];  
eigenarrays = Transpose[eigenarrays];  
fractions = eigenexpressions^2 / Sum[eigenexpressions[[a]]^2, {a, 1, arrays}];  
entropy = -N[Sum[fractions[[a]] * Log[fractions[[a]]], {a, 1, arrays}] / Log[arrays];  
entropy = N[Round[100 * entropy] / 100]
```

```
0.04
```

```
(* Create Fractions Bar Charts Displays *)
```

```
fractions[[2]]
```

```
0.00536708
```

```
limit = 0.008;
```

```
Clear[gridx, framex, framey, sizes];  
gridx = Table[a, {a, 0, limit, N[limit/4]}];  
framex = gridx;  
sizes = Flatten[  
  Table[  
    Dimensions[  
      Characters[  
        ToString[framex[[a]]  
        ]], {a, 1, 5}];  
Do[  
  Do[framex[[a]] = StringJoin[ToString[framex[[a]]], " "],  
    {b, 1, 5 - sizes[[a]]},  
    {a, 1, 5}];  
framex = Table[{gridx[[a]], framex[[a]]}, {a, 1, 5};  
gridx = Table[{gridx[[a]], RGBColor[0, 0, 0]}, {a, 1, 5};  
framey = Table[{a + 1, arrays - a - 8}, {a, 0, 10 - 2};  
table = Table[fractions[[arrays - a]], {a, 8, arrays - 2};  
g = BarChart[table,  
  BarOrientation -> Horizontal,  
  PlotRange -> {{0, limit * 1.0001}, {0.5, 10 - 1 + 0.5}},  
  AspectRatio -> 1,  
  Axes -> False,  
  Frame -> True,  
  FrameTicks -> {None, framey, framex, None},  
  FrameLabel -> {None, None, None, None},  
  GridLines -> {gridx, None},  
  DisplayFunction -> Identity];  
g = FullGraphics[g];  
g[[1, 2]] = g[[1, 2]] /.  
  Text[a_, {b_, c_}, {0., -1.}] ->  
  Text[a, {b, c + 1.75}, {0, 0}, {0, 1}];  
g1 = Show[g,  
  AspectRatio -> 1.25,  
  PlotRange -> All,  
  DisplayFunction -> Identity];
```

```

gridx = Table[a, {a, 0, 1, 0.2}];
framex = gridx;
sizes = Flatten[
  Table[
    Dimensions[
      Characters[
        ToString[framex[[a]]
      ]]], {a, 1, 6}];
Do[
  Do[framex[[a]] = StringJoin[ToString[framex[[a]]], " ",
    {b, 1, size - sizes[[a]]}],
    {a, 1, 6}];
framex = Table[{gridx[[a]], framex[[a]]}, {a, 1, 6}];
gridx = Table[{gridx[[a]], RGBColor[0, 0, 0]}, {a, 1, 6}];
framey = Table[{a + 1, arrays - a}, {a, 0, arrays - 1}];
labelx = ColumnForm[
  {"(b) Eigenexpression Fraction", StringJoin["d2 = ", ToString[entropy]], " "},
  Center];
g = BarChart[
  Table[fractions[[arrays - a]], {a, 0, arrays - 1}],
  BarOrientation -> Horizontal,
  PlotRange -> {{0, 1.0001}, {0.5, arrays + 0.5}},
  AspectRatio -> 1,
  Axes -> False,
  Frame -> True,
  FrameTicks -> {None, framey, framex, None},
  FrameLabel -> {None, None, labelx, None},
  GridLines -> {gridx, None},
  DisplayFunction -> Identity];
g = FullGraphics[g];
g[[1, 2]] = g[[1, 2]] /.
  Text[labelx, {b_, c_}, {0., -1.}] ->
  Text[labelx, {b, c + 3}, {0, -1}, {1, 0}];
g[[1, 2]] = g[[1, 2]] /.
  Text[a_, {b_, c_}, {0., -1.}] ->
  Text[a, {b, c + 2.7}, {0, 0}, {0, 1}];
g2 = Show[{g,
  Graphics[{RGBColor[1, 1, 0.8], Rectangle[{0.1, 0.6}, {0.98, 16.6}]},
  Graphics[{Rectangle[{0.1, 0.6}, {0.98, 16.6}, g1]}]},
  AspectRatio -> 1.35,
  PlotRange -> All,
  DisplayFunction -> Identity];

```

(\* Create Eigengenes 2D Red & Green Raster Display \*)

```

contrast = 3.5;
displaying = Table[
  If[contrast * eigengenes[[i, j]] > 0,
    If[contrast * eigengenes[[i, j]] < 1, {contrast * eigengenes[[i, j]], 0}, {1, 0}],
    If[contrast * eigengenes[[i, j]] > -1, {0, -contrast * eigengenes[[i, j]]}, {0, 1}]],
  {i, 1, arrays}, {j, 1, arrays}];
framex = Table[{a - 0.5, arraynames[[2, a]]}, {a, 1, arrays}];
framey = Table[{a + 1 - 0.5, arrays - a}, {a, 0, arrays - 1}];
labely = "Eigengenes";
labelx = ColumnForm[{"(a) Arrays", " ", " "}, Center];
g = Show[
  Graphics[
    RasterArray[
      Table[
        RGBColor[displaying[[i, j, 1]], displaying[[i, j, 2]], 0],
        {i, arrays, 1, -1}, {j, 1, arrays}]]],
  AspectRatio -> 1,
  Frame -> True,
  FrameTicks -> {None, framey, framex, None},
  FrameLabel -> {None, labely, labelx, None},
  DisplayFunction -> Identity];
g = FullGraphics[g];
g[[1, 2]] = g[[1, 2]] /.
  Text[labely, {b_, c_}, {1., 0.}] ->
  Text[labely, {b - 3, c}, {0, 0}, {0, 1}];
g[[1, 2]] = g[[1, 2]] /.
  Text[labelx, {b_, c_}, {0., -1.}] ->
  Text[labelx, {b, c + 3}, {0, -1}, {1, 0}];
g[[1, 2]] = g[[1, 2]] /.
  Text[a_, {b_, c_}, {0., -1.}] ->
  Text[a, {b, c + 2.7}, {0, 0}, {0, 1}];
g1 = Show[g,
  AspectRatio -> 1.05,
  PlotRange -> All,
  DisplayFunction -> Identity];

```

(\* Create Selected Eigengenes Graph Display \*)

```

eigengenes4 = Chop[TrigFit[eigengenes[[4]], 2, {5/4 * (x - 1), arrays - 1}], 0.1]
eigengenes5 = Chop[TrigFit[eigengenes[[5]], 2, {5/4 * (x - 1), arrays - 1}], 0.175]

0.182993 Sin[ $\frac{5}{17} \pi (-1 + x)$ ]
-0.224054 Cos[ $\frac{5}{17} \pi (-1 + x)$ ]

eigengenes4 = Sqrt[2/17.] * Sin[5 * Pi * (x - 1) / 17];
eigengenes5 = -Sqrt[2/17.] * Cos[5 * Pi * (x - 1) / 17];

```

```

labelx = ColumnForm[{"(c) Arrays"}, Center];
labely = ColumnForm[{" ", "Expression Level"}, Center];
framex = Table[{a - 1, arraynames[[2, a]]}, {a, 1, arrays}];
framey = {-1, -0.5, 0, 0.5, 1};
coordinates = Table[{a - 1, eigengenes[[1, a]]}, {a, 1, arrays}];
points = Table[Point[coordinates[[a]]], {a, 1, arrays}];
line = Line[coordinates];
g = Show[
  {Graphics[{RGBColor[1, 0, 0], PointSize[0.022], points}],
   Graphics[{RGBColor[1, 0, 0], line}]},
  Frame -> True,
  FrameLabel -> {None, labely, labelx, None},
  GridLines -> {None, {{0, RGBColor[0, 0, 0]}}},
  FrameTicks -> {None, framey, framex, None},
  PlotRange -> {-1.05, 1.05},
  DisplayFunction -> Identity];
g = FullGraphics[g];
g[[1, 2]] = g[[1, 2]] /.
  Text[labely, {b_, c_}, {1., 0.}] ->
  Text[labely, {b - 5.4, c}, {0, 0}, {0, 1}];
g[[1, 2]] = g[[1, 2]] /.
  Text[labelx, {b_, c_}, {0., -1.}] ->
  Text[labelx, {b, c + 0.625}, {0, -1}, {1, 0}];
g[[1, 2]] = g[[1, 2]] /.
  Text[a_, {b_, c_}, {0., -1.}] ->
  Text[a, {b, c + 0.25}, {0, 0}, {0, 1}];
p1 = Show[g,
  AspectRatio -> 1.05,
  PlotRange -> All,
  DisplayFunction -> Identity];

labelx = ColumnForm[{"(d) Arrays"}, Center];
labely = ColumnForm[{" ", "Expression Level"}, Center];
framex = Table[{a - 1, arraynames[[2, a]]}, {a, 1, arrays}];
framey = {-1, -0.5, 0, 0.5, 1};
coordinates = Table[{a - 1, eigengenes[[2, a]]}, {a, 1, arrays}];
points = Table[Point[coordinates[[a]]], {a, 1, arrays}];
line = Line[coordinates];
g = Show[
  {Graphics[{RGBColor[1, 0, 0], PointSize[0.022], points}],
   Graphics[{RGBColor[1, 0, 0], line}]},
  Frame -> True,
  FrameLabel -> {None, labely, labelx, None},
  GridLines -> {None, {{0, RGBColor[0, 0, 0]}}},
  FrameTicks -> {None, framey, framex, None},
  PlotRange -> {-1.05, 1.05},
  DisplayFunction -> Identity];
g = FullGraphics[g];
g[[1, 2]] = g[[1, 2]] /.
  Text[labely, {b_, c_}, {1., 0.}] ->
  Text[labely, {b - 5.4, c}, {0, 0}, {0, 1}];
g[[1, 2]] = g[[1, 2]] /.
  Text[labelx, {b_, c_}, {0., -1.}] ->
  Text[labelx, {b, c + 0.625}, {0, -1}, {1, 0}];
g[[1, 2]] = g[[1, 2]] /.
  Text[a_, {b_, c_}, {0., -1.}] ->
  Text[a, {b, c + 0.25}, {0, 0}, {0, 1}];
p2 = Show[g,
  AspectRatio -> 1.05,
  PlotRange -> All,
  DisplayFunction -> Identity];

```

```

labelx = ColumnForm[{"(d) Arrays"}, Center];
labely = ColumnForm[{" ", "Expression Level"}, Center];
framex = Table[{a - 1, arraynames[[2, a]]}, {a, 1, arrays}];
framey = {-1, -0.5, 0, 0.5, 1};
coordinates = Table[{a - 1, eigengenes[[3, a]]}, {a, 1, arrays}];
points = Table[Point[coordinates[[a]]], {a, 1, arrays}];
line = Line[coordinates];
g = Show[
  {Graphics[{RGBColor[0, 0, 1], PointSize[0.022], points}],
   Graphics[{RGBColor[0, 0, 1], line}]},
  Frame -> True,
  FrameLabel -> {None, labely, labelx, None},
  GridLines -> {None, {{0, RGBColor[0, 0, 0]}}},
  FrameTicks -> {None, framey, framex, None},
  PlotRange -> {-1.05, 1.05},
  DisplayFunction -> Identity];
g = FullGraphics[g];
g[[1, 2]] = g[[1, 2]] /.
  Text[labely, {b_, c_}, {1., 0.}] ->
  Text[labely, {b - 5.4, c}, {0, 0}, {0, 1}];
g[[1, 2]] = g[[1, 2]] /.
  Text[labelx, {b_, c_}, {0., -1.}] ->
  Text[labelx, {b, c + 0.625}, {0, -1}, {1, 0}];
g[[1, 2]] = g[[1, 2]] /.
  Text[a_, {b_, c_}, {0., -1.}] ->
  Text[a, {b, c + 0.25}, {0, 0}, {0, 1}];
p3 = Show[g,
  AspectRatio -> 1.05,
  PlotRange -> All,
  DisplayFunction -> Identity];

```

```

graph = Plot[eigengenes4,
  {x, 0, arrays - 1},
  PlotStyle -> {RGBColor[1, 0, 0], Dashing[{0.03, 0.02}]},
  DisplayFunction -> Identity];
labelx = ColumnForm[{"(e) Arrays"}, Center];
labeledy = ColumnForm[{" ", " "}, Center];
framex = Table[{a - 1, arraynames[[2, a]]}, {a, 1, arrays}];
framey = {-1, -0.5, 0, 0.5, 1};
coordinates = Table[{a - 1, eigengenes[[4, a]]}, {a, 1, arrays}];
points = Table[Point[coordinates[[a]]], {a, 1, arrays}];
line = Line[coordinates];
g = Show[
  {Graphics[{RGBColor[1, 0, 0], PointSize[0.022], points}],
  Graphics[{RGBColor[1, 0, 0], line}],
  graph,

  Graphics[{{RGBColor[1, 0, 0], Text[" $\sqrt{\frac{2}{T}} \sin(\frac{5\pi t}{T})$ ", {8.5, 0.7}]}]}],
  Frame -> True,
  FrameLabel -> {None, labeledy, labelx, None},
  GridLines -> {None, {{0, RGBColor[0, 0, 0]}}},
  FrameTicks -> {None, framey, framex, None},
  PlotRange -> {-1.05, 1.05},
  DisplayFunction -> Identity];
g = FullGraphics[g];
g[[1, 2]] = g[[1, 2]] /.
  Text[labeledy, {b_, c_}, {1., 0.}] ->
  Text[labeledy, {b - 5.4, c}, {0, 0}, {0, 1}];
g[[1, 2]] = g[[1, 2]] /.
  Text[labelx, {b_, c_}, {0., -1.}] ->
  Text[labelx, {b, c + 0.625}, {0, -1}, {1, 0}];
g[[1, 2]] = g[[1, 2]] /.
  Text[a_, {b_, c_}, {0., -1.}] ->
  Text[a, {b, c + 0.25}, {0, 0}, {0, 1}];
p4 = Show[g,
  AspectRatio -> 1.05,
  PlotRange -> All,
  DisplayFunction -> Identity];

```

```

graph = Plot[eigengenes5,
  {x, 0, arrays - 1},
  PlotStyle -> {RGBColor[0, 0, 1], Dashing[{0.03, 0.02}]},
  DisplayFunction -> Identity];
labelx = ColumnForm[{"(e) Arrays"}, Center];
labely = ColumnForm[{" ", " "}, Center];
framex = Table[{a - 1, arraynames[[2, a]]}, {a, 1, arrays}];
framey = {-1, -0.5, 0, 0.5, 1};
coordinates = Table[{a - 1, eigengenes[[5, a]]}, {a, 1, arrays}];
points = Table[Point[coordinates[[a]]], {a, 1, arrays}];
line = Line[coordinates];
g = Show[
  {Graphics[{RGBColor[0, 0, 1], PointSize[0.022], points}},
  Graphics[{RGBColor[0, 0, 1], line}},
  graph,

  Graphics[{{RGBColor[0, 0, 1], Text[" $\sqrt{\frac{2}{T}} \cos(\frac{5\pi t}{T})$ ", {8.5, -0.7}]}]}],

  Frame -> True,
  FrameLabel -> {None, labely, labelx, None},
  GridLines -> {None, {{0, RGBColor[0, 0, 0]}}},
  FrameTicks -> {None, framey, framex, None},
  PlotRange -> {-1.05, 1.05},
  DisplayFunction -> Identity];
g = FullGraphics[g];
g[[1, 2]] = g[[1, 2]] /.
  Text[labely, {b_, c_}, {1., 0.}] ->
  Text[labely, {b - 5.4, c}, {0, 0}, {0, 1}];
g[[1, 2]] = g[[1, 2]] /.
  Text[labelx, {b_, c_}, {0., -1.}] ->
  Text[labelx, {b, c + 0.625}, {0, -1}, {1, 0}];
g[[1, 2]] = g[[1, 2]] /.
  Text[a_, {b_, c_}, {0., -1.}] ->
  Text[a, {b, c + 0.25}, {0, 0}, {0, 1}];
p5 = Show[g,
  AspectRatio -> 1.05,
  PlotRange -> All,
  DisplayFunction -> Identity];

```

(\* Display Selected Eigengenes \*)

```
g3 = Show[{p3, p2},
  DisplayFunction -> Identity];
g4 = Show[{p5, p4},
  DisplayFunction -> Identity];
```

(\* Display Eigengenes, Fractions and Selected Eigengenes \*)

```
Show[GraphicsArray[{g1, g2, p1}],
  GraphicsSpacing -> -0.15];
```

(a) Arrays

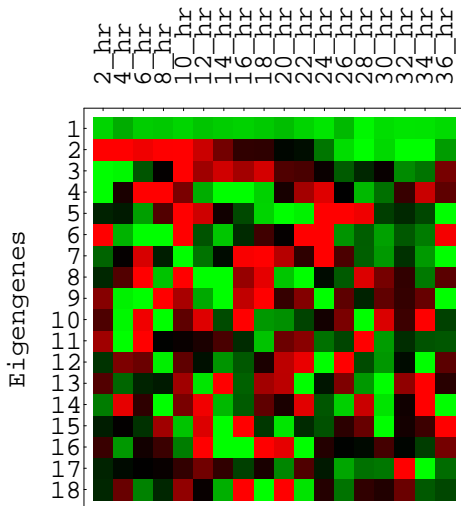

(b) Eigenexpression Fraction  
 $d_2 = 0.04$

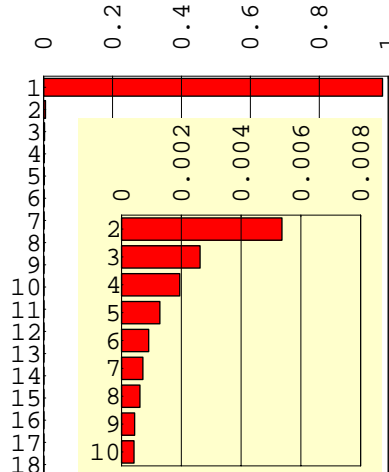

(c) Arrays

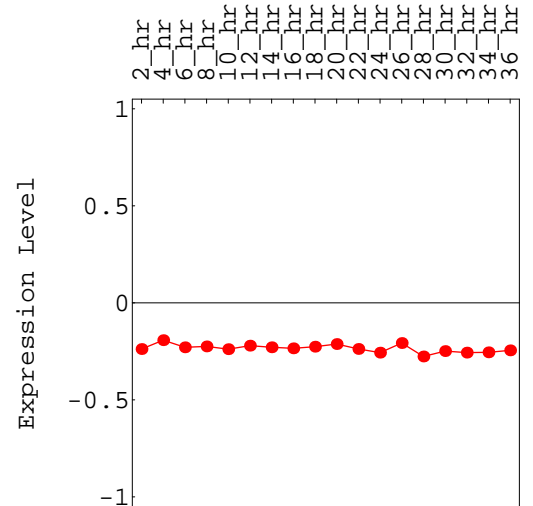

```
Show[GraphicsArray[{g3, g4}],
  GraphicsSpacing -> -0.15];
```

(d) Arrays

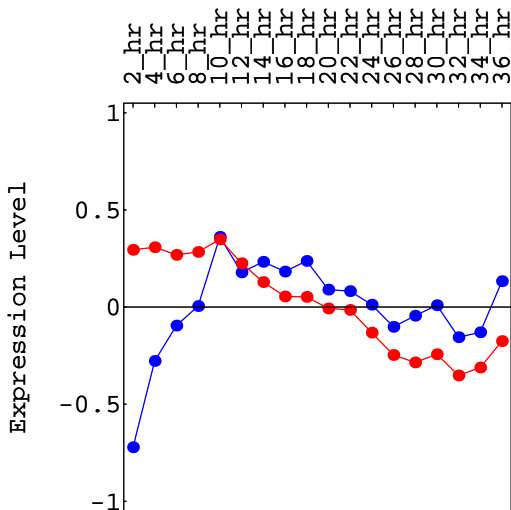

(e) Arrays

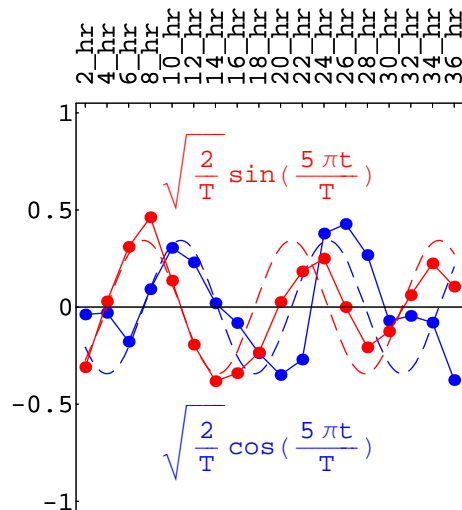



```
(* Calculate GSVD of Yeast and Human Data *)
```

```
matrix = AppendColumns[matrix1, matrix2];
{q, r} = QRDecomposition[matrix];
q = Conjugate[Transpose[q]];
q1 = TakeRows[q, {1, genes1}];
{u1, w1, v1} = SingularValues[q1];
genelets = Dot[v1, r];
Do[genelets[[a]] = genelets[[a]] / Sqrt[Dot[genelets[[a]], genelets[[a]]],
  {a, 1, arrays}]

genelets[[3]] = -genelets[[3]];
genelets[[4]] = -genelets[[4]];
genelets[[5]] = -genelets[[5]];
genelets[[6]] = -genelets[[6]];
genelets[[15]] = -genelets[[15]];
genelets[[18]] = -genelets[[18]];

arraylets1 = Dot[matrix1, Inverse[genelets]];
arraylets2 = Dot[matrix2, Inverse[genelets]];
arraylets1 = Transpose[arraylets1];
Do[arraylets1[[a]] = arraylets1[[a]] / Sqrt[Dot[arraylets1[[a]], arraylets1[[a]]], {a, 1, arrays}];
arraylets1 = Transpose[arraylets1];
arraylets2 = Transpose[arraylets2];
Do[arraylets2[[a]] = arraylets2[[a]] / Sqrt[Dot[arraylets2[[a]], arraylets2[[a]]], {a, 1, arrays}];
arraylets2 = Transpose[arraylets2];
d1 = Chop[Dot[PseudoInverse[arraylets1], matrix1, Inverse[genelets]]];
d2 = Chop[Dot[PseudoInverse[arraylets2], matrix2, Inverse[genelets]]];
```

```
(* Create Angular Distances Bar Charts Displays *)
```

```
arraynames = Transpose[Table[{a, a}, {a, 1, arrays}]];
sizes = Flatten[
  Table[
    Dimensions[
      Characters[
        ToString[arraynames[[2, a]]
      ]], {a, 1, arrays}]];
size = 5;
Do[
  Do[arraynames[[2, a]] = StringJoin[ToString[arraynames[[2, a]]], " ",
    {b, 1, size - sizes[[a]]},
    {a, 1, arrays}];
distances =
  Table[N[ArcTan[d1[[a, a]] / d2[[a, a]]] / Pi], {a, 1, arrays}] -
  Table[0.25, {a, 1, arrays}];

Clear[gridx, framex, framey, sizes];
gridx = {-0.25, -0.125, 0, 0.125, 0.25};
framex = {"-π/4", "-π/8", "0", "π/8", "π/4"};
framex = Table[{gridx[[a]], framex[[a]]}, {a, 1, 5}];
gridx = Table[{gridx[[a]], RGBColor[0, 0, 0]}, {a, 1, 5}];
framey = Table[{a + 1, arrays - a}, {a, 0, arrays - 1}];
labelx = ColumnForm[{"(b) Angular Distance", " ", " "}, Center];
```

```

g = BarChart[
  Table[distances[[arrays - a]], {a, 0, arrays - 1}],
  BarOrientation -> Horizontal,
  BarStyle -> RGBColor[1, 0, 0],
  PlotRange -> {{-0.25*1.0001, 0.25*1.0001}, {0.5, arrays + 0.5}},
  AspectRatio -> 1,
  Axes -> False,
  Frame -> True,
  FrameTicks -> {None, framey, framex, None},
  FrameLabel -> {None, None, labelx, None},
  GridLines -> {gridx, None},
  DisplayFunction -> Identity];
g = FullGraphics[g];
g[[1, 2]] = g[[1, 2]] /.
  Text[labelx, {b_, c_}, {0., -1.}] ->
  Text[labelx, {b, c + 1.6}, {0, -1}, {1, 0}];
g[[1, 2]] = g[[1, 2]] /.
  Text[a_, {b_, c_}, {0., -1.}] ->
  Text[a, {b, c + 2}, {0, 0}, {0, 1}];
g2 = Show[g,
  AspectRatio -> 1.35,
  PlotRange -> All,
  DisplayFunction -> Identity];

(* Create Genelets 2D Red & Green Raster Display *)

average = Table[1, {a, 1, arrays}];
average = N[average / Sqrt[Dot[average, average]]];
centergenelets = genelets - N[Outer[Times, Dot[genelets, average], average]];

contrast = 4;
displaying = Table[
  If[contrast * centergenelets[[i, j]] > 0,
    If[contrast * centergenelets[[i, j]] < 1, {contrast * centergenelets[[i, j]], 0}, {1, 0}],
    If[contrast * centergenelets[[i, j]] > -1, {0, -contrast * centergenelets[[i, j]]}, {0, 1}]],
  {i, 1, arrays}, {j, 1, arrays}];
framex = Table[{a - 0.5, arraynames[[2, a]]}, {a, 1, arrays}];
framey = Table[{a + 1 - 0.5, arrays - a}, {a, 0, arrays - 1}];
labely = "Genelets";
labelx = ColumnForm[{"(a) Arrays", " ", " "}, Center];
g = Show[
  Graphics[
    RasterArray[
      Table[
        RGBColor[displaying[[i, j, 1]], displaying[[i, j, 2]], 0],
        {i, arrays, 1, -1}, {j, 1, arrays}]]],
  AspectRatio -> 1,
  Frame -> True,
  FrameTicks -> {None, framey, framex, None},
  FrameLabel -> {None, labely, labelx, None},
  DisplayFunction -> Identity];
g = FullGraphics[g];
g[[1, 2]] = g[[1, 2]] /.
  Text[labely, {b_, c_}, {1., 0.}] ->
  Text[labely, {b - 3, c}, {0, 0}, {0, 1}];
g[[1, 2]] = g[[1, 2]] /.
  Text[labelx, {b_, c_}, {0., -1.}] ->
  Text[labelx, {b, c + 1.6}, {0, -1}, {1, 0}];
g[[1, 2]] = g[[1, 2]] /.
  Text[a_, {b_, c_}, {0., -1.}] ->
  Text[a, {b, c + 2}, {0, 0}, {0, 1}];
g1 = Show[g,
  AspectRatio -> 1.05,
  PlotRange -> All,
  DisplayFunction -> Identity];

```

(\* Create Selected Genelets Graph Display \*)

```
labelx = ColumnForm[{"(c) Arrays"}, Center];
labely = ColumnForm[{" ", " "}, Center];
framex = Table[{a - 1, arraynames[[2, a]]}, {a, 1, arrays}];
framey = {-1, -0.5, 0, 0.5, 1};
coordinates = Table[{a - 1, genelets[[1, a]]}, {a, 1, arrays}];
points = Table[Point[coordinates[[a]]], {a, 1, arrays}];
line = Line[coordinates];
g = Show[
  {Graphics[{RGBColor[1, 0, 0], PointSize[0.022], points}],
   Graphics[{RGBColor[1, 0, 0], line}]},
  Frame -> True,
  FrameLabel -> {None, labely, labelx, None},
  GridLines -> {None, {{0, RGBColor[0, 0, 0]}}},
  FrameTicks -> {None, framey, framex, None},
  PlotRange -> {-1.05, 1.05},
  DisplayFunction -> Identity];
g = FullGraphics[g];
g[[1, 2]] = g[[1, 2]] /.
  Text[labely, {b_, c_}, {1., 0.}] ->
  Text[labely, {b - 4, c}, {0, 0}, {0, 1}];
g[[1, 2]] = g[[1, 2]] /.
  Text[labelx, {b_, c_}, {0., -1.}] ->
  Text[labelx, {b, c + 0.3}, {0, -1}, {1, 0}];
g[[1, 2]] = g[[1, 2]] /.
  Text[a_, {b_, c_}, {0., -1.}] ->
  Text[a, {b, c + 0.22}, {0, 0}, {0, 1}];
p1 = Show[g,
  AspectRatio -> 0.95,
  PlotRange -> All,
  DisplayFunction -> Identity];
```

```
labelx = ColumnForm[{"(c) Arrays"}, Center];
labely = ColumnForm[{" ", " "}, Center];
framex = Table[{a - 1, arraynames[[2, a]]}, {a, 1, arrays}];
framey = {-1, -0.5, 0, 0.5, 1};
coordinates = Table[{a - 1, genelets[[2, a]]}, {a, 1, arrays}];
points = Table[Point[coordinates[[a]]], {a, 1, arrays}];
line = Line[coordinates];
g = Show[
  {Graphics[{RGBColor[0, 0, 1], PointSize[0.022], points}],
   Graphics[{RGBColor[0, 0, 1], line}]},
  Frame -> True,
  FrameLabel -> {None, labely, labelx, None},
  GridLines -> {None, {{0, RGBColor[0, 0, 0]}}},
  FrameTicks -> {None, framey, framex, None},
  PlotRange -> {-1.05, 1.05},
  DisplayFunction -> Identity];
g = FullGraphics[g];
g[[1, 2]] = g[[1, 2]] /.
  Text[labely, {b_, c_}, {1., 0.}] ->
  Text[labely, {b - 4, c}, {0, 0}, {0, 1}];
g[[1, 2]] = g[[1, 2]] /.
  Text[labelx, {b_, c_}, {0., -1.}] ->
  Text[labelx, {b, c + 0.3}, {0, -1}, {1, 0}];
g[[1, 2]] = g[[1, 2]] /.
  Text[a_, {b_, c_}, {0., -1.}] ->
  Text[a, {b, c + 0.22}, {0, 0}, {0, 1}];
p2 = Show[g,
  AspectRatio -> 0.95,
  PlotRange -> All,
  DisplayFunction -> Identity];
```

```

genelets3 = Sqrt[2/3/17.] - Sqrt[2/3/17.] * Cos[4 * Pi * x / 17. + Pi / 3];
graph = Plot[genelets3,
  {x, 0, arrays - 1},
  PlotStyle -> {RGBColor[1, 0, 0], Dashing[{0.03, 0.02}]},
  DisplayFunction -> Identity];
labelx = ColumnForm[{"(a) Arrays"}, Center];
labeledy = ColumnForm[{"", "Expression Level"}, Center];
framex = Table[{a - 1, arraynames[[2, a]]}, {a, 1, arrays}];
framey = {-1, -0.5, 0, 0.5, 1};
coordinates = Table[{a - 1, genelets[[3, a]]}, {a, 1, arrays}];
points = Table[Point[coordinates[[a]]], {a, 1, arrays}];
line = Line[coordinates];
g = Show[
  {Graphics[{RGBColor[1, 0, 0], PointSize[0.022], points}],
  Graphics[{RGBColor[1, 0, 0], line}],
  graph,
  Graphics[{{RGBColor[1, 0, 0], Text[" $\sqrt{\frac{2}{3T}} [1 - \cos(\frac{4\pi t}{T} + \frac{\pi}{3})]$ ", {9, 1}]}]}],
  Frame -> True,
  FrameLabel -> {None, labeledy, labelx, None},
  GridLines -> {None, {{0, RGBColor[0, 0, 0]}}},
  FrameTicks -> {None, framey, framex, None},
  PlotRange -> {-0.85, 1.25},
  DisplayFunction -> Identity];
g = FullGraphics[g];
g[[1, 2]] = g[[1, 2]] /.
  Text[labeledy, {b_, c_}, {1., 0.}] ->
  Text[labeledy, {b - 4, c}, {0, 0}, {0, 1}];
g[[1, 2]] = g[[1, 2]] /.
  Text[labelx, {b_, c_}, {0., -1.}] ->
  Text[labelx, {b, c + 0.3}, {0, -1}, {1, 0}];
g[[1, 2]] = g[[1, 2]] /.
  Text[a_, {b_, c_}, {0., -1.}] ->
  Text[a, {b, c + 0.22}, {0, 0}, {0, 1}];
p3 = Show[g,
  AspectRatio -> 0.95,
  PlotRange -> All,
  DisplayFunction -> Identity];

```

```

genelets4 = -Sqrt[2/3/17.] + Sqrt[2/3/17.] * Cos[4 * Pi * x / 17.];
graph = Plot[genelets4,
  {x, 0, arrays - 1},
  PlotStyle -> {RGBColor[0, 0, 1], Dashing[{0.03, 0.02}]},
  DisplayFunction -> Identity];
labelx = ColumnForm[{"(a) Arrays"}, Center];
labeledy = ColumnForm[{" ", " "}, Center];
framex = Table[{a - 1, arraynames[[2, a]]}, {a, 1, arrays}];
framey = {-1, -0.5, 0, 0.5, 1};
coordinates = Table[{a - 1, genelets[[4, a]]}, {a, 1, arrays}];
points = Table[Point[coordinates[[a]]], {a, 1, arrays}];
line = Line[coordinates];
g = Show[
  {Graphics[{RGBColor[0, 0, 1], PointSize[0.022], points}],
  Graphics[{RGBColor[0, 0, 1], line}],
  graph,

  Graphics[{RGBColor[0, 0, 1], Text["- $\sqrt{\frac{2}{3T}} [1 - \cos(\frac{4\pi t}{T})]$ ", {9, 0.65}]}]},

  Frame -> True,
  FrameLabel -> {None, labeledy, labelx, None},
  GridLines -> {None, {{0, RGBColor[0, 0, 0]}}},
  FrameTicks -> {None, framey, framex, None},
  PlotRange -> {-0.85, 1.25},
  DisplayFunction -> Identity];
g = FullGraphics[g];
g[[1, 2]] = g[[1, 2]] /.
  Text[labeledy, {b_, c_}, {1., 0.}] ->
  Text[labeledy, {b - 4, c}, {0, 0}, {0, 1}];
g[[1, 2]] = g[[1, 2]] /.
  Text[labelx, {b_, c_}, {0., -1.}] ->
  Text[labelx, {b, c + 0.3}, {0, -1}, {1, 0}];
g[[1, 2]] = g[[1, 2]] /.
  Text[a_, {b_, c_}, {0., -1.}] ->
  Text[a, {b, c + 0.22}, {0, 0}, {0, 1}];
p4 = Show[g,
  AspectRatio -> 0.95,
  PlotRange -> All,
  DisplayFunction -> Identity];

```

```

genelets5 = Sqrt[2/17.] * Cos[4 * Pi * x / 17. - Pi / 3];
graph = Plot[genelets5,
  {x, 0, arrays - 1},
  PlotStyle -> {RGBColor[0, 0.5, 0], Dashing[{0.03, 0.02}]},
  DisplayFunction -> Identity];
labelx = ColumnForm[{"(a) Arrays"}, Center];
labeledy = ColumnForm[{" ", " "}, Center];
framex = Table[{a - 1, arraynames[[2, a]]}, {a, 1, arrays}];
framey = {-1, -0.5, 0, 0.5, 1};
coordinates = Table[{a - 1, genelets[[5, a]]}, {a, 1, arrays}];
points = Table[Point[coordinates[[a]]], {a, 1, arrays}];
line = Line[coordinates];
g = Show[
  {Graphics[{RGBColor[0, 0.5, 0], PointSize[0.022], points}],
  Graphics[{RGBColor[0, 0.5, 0], line}],
  graph,

  Graphics[{RGBColor[0, 0.5, 0], Text[" $\sqrt{\frac{2}{T}} \cos(\frac{4\pi t}{T} - \frac{\pi}{3})$ ", {11.5, -0.65}]}]},

  Frame -> True,
  FrameLabel -> {None, labeledy, labelx, None},
  GridLines -> {None, {{0, RGBColor[0, 0, 0]}}},
  FrameTicks -> {None, framey, framex, None},
  PlotRange -> {-0.85, 1.25},
  DisplayFunction -> Identity];
g = FullGraphics[g];
g[[1, 2]] = g[[1, 2]] /.
  Text[labeledy, {b_, c_}, {1., 0.}] ->
  Text[labeledy, {b - 4, c}, {0, 0}, {0, 1}];
g[[1, 2]] = g[[1, 2]] /.
  Text[labelx, {b_, c_}, {0., -1.}] ->
  Text[labelx, {b, c + 0.3}, {0, -1}, {1, 0}];
g[[1, 2]] = g[[1, 2]] /.
  Text[a_, {b_, c_}, {0., -1.}] ->
  Text[a, {b, c + 0.22}, {0, 0}, {0, 1}];
p5 = Show[g,
  AspectRatio -> 0.95,
  PlotRange -> All,
  DisplayFunction -> Identity];

```

```

labelx = ColumnForm[{"(c) Arrays"}, Center];
labeley = ColumnForm[{" ", " "}, Center];
framex = Table[{a - 1, arraynames[[2, a]]}, {a, 1, arrays}];
framey = {-1, -0.5, 0, 0.5, 1};
coordinates = Table[{a - 1, genelets[[6, a]]}, {a, 1, arrays}];
points = Table[Point[coordinates[[a]]], {a, 1, arrays}];
line = Line[coordinates];
g = Show[
  {Graphics[{RGBColor[0.75, 0, 1], PointSize[0.022], points}],
   Graphics[{RGBColor[0.75, 0, 1], line}]},
  Frame -> True,
  FrameLabel -> {None, labeley, labelx, None},
  GridLines -> {None, {{0, RGBColor[0, 0, 0]}}},
  FrameTicks -> {None, framey, framex, None},
  PlotRange -> {-1.05, 1.05},
  DisplayFunction -> Identity];
g = FullGraphics[g];
g[[1, 2]] = g[[1, 2]] /.
  Text[labeley, {b_, c_}, {1., 0.}] ->
  Text[labeley, {b - 4, c}, {0, 0}, {0, 1}];
g[[1, 2]] = g[[1, 2]] /.
  Text[labelx, {b_, c_}, {0., -1.}] ->
  Text[labelx, {b, c + 0.3}, {0, -1}, {1, 0}];
g[[1, 2]] = g[[1, 2]] /.
  Text[a_, {b_, c_}, {0., -1.}] ->
  Text[a, {b, c + 0.22}, {0, 0}, {0, 1}];
p6 = Show[g,
  AspectRatio -> 0.95,
  PlotRange -> All,
  DisplayFunction -> Identity];

```

```

genelets14 = -Sqrt[2/3/17.] + Sqrt[2/3/17.] * Cos[5 * Pi * x / 17. - Pi / 3];
graph = Plot[genelets14,
  {x, 0, arrays - 1},
  PlotStyle -> {RGBColor[1, 0, 0], Dashing[{0.03, 0.02}]},
  DisplayFunction -> Identity];
labelx = ColumnForm[{"(b) Arrays"}, Center];
labeledy = ColumnForm[{" ", " "}, Center];
framex = Table[{a - 1, arraynames[[2, a]]}, {a, 1, arrays}];
framey = {-1, -0.5, 0, 0.5, 1};
coordinates = Table[{a - 1, genelets[[14, a]]}, {a, 1, arrays}];
points = Table[Point[coordinates[[a]]], {a, 1, arrays}];
line = Line[coordinates];
g = Show[
  {Graphics[{RGBColor[1, 0, 0], PointSize[0.022], points}],
  Graphics[{RGBColor[1, 0, 0], line}],
  graph,
  Graphics[{{RGBColor[1, 0, 0], Text["- $\sqrt{\frac{2}{3T}} [1 - \cos(\frac{5\pi t}{T} - \frac{\pi}{3})]$ ", {9, 1}]}]}],
  Frame -> True,
  FrameLabel -> {None, labeledy, labelx, None},
  GridLines -> {None, {{0, RGBColor[0, 0, 0]}}},
  FrameTicks -> {None, framey, framex, None},
  PlotRange -> {-0.85, 1.25},
  DisplayFunction -> Identity];
g = FullGraphics[g];
g[[1, 2]] = g[[1, 2]] /.
  Text[labeledy, {b_, c_}, {1., 0.}] ->
  Text[labeledy, {b - 4, c}, {0, 0}, {0, 1}];
g[[1, 2]] = g[[1, 2]] /.
  Text[labelx, {b_, c_}, {0., -1.}] ->
  Text[labelx, {b, c + 0.3}, {0, -1}, {1, 0}];
g[[1, 2]] = g[[1, 2]] /.
  Text[a_, {b_, c_}, {0., -1.}] ->
  Text[a, {b, c + 0.22}, {0, 0}, {0, 1}];
p14 = Show[g,
  AspectRatio -> 0.95,
  PlotRange -> All,
  DisplayFunction -> Identity];

```



```

genelets15 = Sqrt[2/3/17.] + Sqrt[2/3/17.] * Cos[5*Pi*x/17. + Pi/3];
graph = Plot[genelets15,
  {x, 0, arrays - 1},
  PlotStyle -> {RGBColor[0, 0, 1], Dashing[{0.03, 0.02}]},
  DisplayFunction -> Identity];
labelx = ColumnForm[{"(b) Arrays"}, Center];
labeledy = ColumnForm[{" ", " "}, Center];
framex = Table[{a - 1, arraynames[[2, a]]}, {a, 1, arrays}];
framey = {-1, -0.5, 0, 0.5, 1};
coordinates = Table[{a - 1, genelets[[15, a]]}, {a, 1, arrays}];
points = Table[Point[coordinates[[a]]], {a, 1, arrays}];
line = Line[coordinates];
g = Show[
  {Graphics[{RGBColor[0, 0, 1], PointSize[0.022], points}],
  Graphics[{RGBColor[0, 0, 1], line}],
  graph,
  Graphics[{{RGBColor[0, 0, 1], Text["  $\sqrt{\frac{2}{3T}} [1 + \cos(\frac{5\pi t}{T} + \frac{\pi}{3})]$ ", {9, 0.65}]}]}],
  Frame -> True,
  FrameLabel -> {None, labeledy, labelx, None},
  GridLines -> {None, {{0, RGBColor[0, 0, 0]}}},
  FrameTicks -> {None, framey, framex, None},
  PlotRange -> {-0.85, 1.25},
  DisplayFunction -> Identity];
g = FullGraphics[g];
g[[1, 2]] = g[[1, 2]] /.
  Text[labeledy, {b_, c_}, {1., 0.}] ->
  Text[labeledy, {b - 4, c}, {0, 0}, {0, 1}];
g[[1, 2]] = g[[1, 2]] /.
  Text[labelx, {b_, c_}, {0., -1.}] ->
  Text[labelx, {b, c + 0.3}, {0, -1}, {1, 0}];
g[[1, 2]] = g[[1, 2]] /.
  Text[a_, {b_, c_}, {0., -1.}] ->
  Text[a, {b, c + 0.22}, {0, 0}, {0, 1}];
p15 = Show[g,
  AspectRatio -> 0.95,
  PlotRange -> All,
  DisplayFunction -> Identity];

```

```

genelets16 = -Sqrt[2/3/17.] - Sqrt[2/3/17.] * Cos[5 * Pi * x / 17.];
graph = Plot[genelets16,
  {x, 0, arrays - 1},
  PlotStyle -> {RGBColor[0, 0.5, 0], Dashing[{0.03, 0.02}]},
  DisplayFunction -> Identity];
labelx = ColumnForm[{"(b) Arrays"}, Center];
labely = ColumnForm[{" ", " "}, Center];
framex = Table[{a - 1, arraynames[[2, a]]}, {a, 1, arrays}];
framey = {-1, -0.5, 0, 0.5, 1};
coordinates = Table[{a - 1, genelets[[16, a]]}, {a, 1, arrays}];
points = Table[Point[coordinates[[a]]], {a, 1, arrays}];
line = Line[coordinates];
g = Show[
  {Graphics[{RGBColor[0, 0.5, 0], PointSize[0.022], points}],
  Graphics[{RGBColor[0, 0.5, 0], line}],
  graph,

  Graphics[{RGBColor[0, 0.5, 0], Text["- $\sqrt{\frac{2}{3T}} [1 + \cos(\frac{5\pi t}{T})]$ ", {9, -0.65}]}]},
  Frame -> True,
  FrameLabel -> {None, labely, labelx, None},
  GridLines -> {None, {{0, RGBColor[0, 0, 0]}}},
  FrameTicks -> {None, framey, framex, None},
  PlotRange -> {-0.85, 1.25},
  DisplayFunction -> Identity];
g = FullGraphics[g];
g[[1, 2]] = g[[1, 2]] /.
  Text[labely, {b_, c_}, {1., 0.}] ->
  Text[labely, {b - 4, c}, {0, 0}, {0, 1}];
g[[1, 2]] = g[[1, 2]] /.
  Text[labelx, {b_, c_}, {0., -1.}] ->
  Text[labelx, {b, c + 0.3}, {0, -1}, {1, 0}];
g[[1, 2]] = g[[1, 2]] /.
  Text[a_, {b_, c_}, {0., -1.}] ->
  Text[a, {b, c + 0.22}, {0, 0}, {0, 1}];
p16 = Show[g,
  AspectRatio -> 0.95,
  PlotRange -> All,
  DisplayFunction -> Identity];

```

```

labelx = ColumnForm[{"(c) Arrays"}, Center];
labely = ColumnForm[{" ", " "}, Center];
framex = Table[{a - 1, arraynames[[2, a]]}, {a, 1, arrays}];
framey = {-1, -0.5, 0, 0.5, 1};
coordinates = Table[{a - 1, genelets[[17, a]]}, {a, 1, arrays}];
points = Table[Point[coordinates[[a]]], {a, 1, arrays}];
line = Line[coordinates];
g = Show[
  {Graphics[{RGBColor[1, 0.5, 0], PointSize[0.022], points}],
   Graphics[{RGBColor[1, 0.5, 0], line}]},
  Frame -> True,
  FrameLabel -> {None, labely, labelx, None},
  GridLines -> {None, {{0, RGBColor[0, 0, 0]}}},
  FrameTicks -> {None, framey, framex, None},
  PlotRange -> {-1.05, 1.05},
  DisplayFunction -> Identity];
g = FullGraphics[g];
g[[1, 2]] = g[[1, 2]] /.
  Text[labely, {b_, c_}, {1., 0.}] ->
  Text[labely, {b - 4, c}, {0, 0}, {0, 1}];
g[[1, 2]] = g[[1, 2]] /.
  Text[labelx, {b_, c_}, {0., -1.}] ->
  Text[labelx, {b, c + 0.3}, {0, -1}, {1, 0}];
g[[1, 2]] = g[[1, 2]] /.
  Text[a_, {b_, c_}, {0., -1.}] ->
  Text[a, {b, c + 0.22}, {0, 0}, {0, 1}];
p17 = Show[g,
  AspectRatio -> 0.95,
  PlotRange -> All,
  DisplayFunction -> Identity];

```

```

labelx = ColumnForm[{"(c) Arrays"}, Center];
labely = ColumnForm[{" ", " "}, Center];
framex = Table[{a - 1, arraynames[[2, a]]}, {a, 1, arrays}];
framey = {-1, -0.5, 0, 0.5, 1};
coordinates = Table[{a - 1, genelets[[18, a]]}, {a, 1, arrays}];
points = Table[Point[coordinates[[a]]], {a, 1, arrays}];
line = Line[coordinates];
g = Show[
  {Graphics[{RGBColor[0, 0.5, 0], PointSize[0.022], points}],
   Graphics[{RGBColor[0, 0.5, 0], line}]},
  Frame -> True,
  FrameLabel -> {None, labely, labelx, None},
  GridLines -> {None, {{0, RGBColor[0, 0, 0]}}},
  FrameTicks -> {None, framey, framex, None},
  PlotRange -> {-1.05, 1.05},
  DisplayFunction -> Identity];
g = FullGraphics[g];
g[[1, 2]] = g[[1, 2]] /.
  Text[labely, {b_, c_}, {1., 0.}] ->
  Text[labely, {b - 4, c}, {0, 0}, {0, 1}];
g[[1, 2]] = g[[1, 2]] /.
  Text[labelx, {b_, c_}, {0., -1.}] ->
  Text[labelx, {b, c + 0.3}, {0, -1}, {1, 0}];
g[[1, 2]] = g[[1, 2]] /.
  Text[a_, {b_, c_}, {0., -1.}] ->
  Text[a, {b, c + 0.22}, {0, 0}, {0, 1}];
p18 = Show[g,
  AspectRatio -> 0.95,
  PlotRange -> All,
  DisplayFunction -> Identity];

```

(\* Display Selected Genelets \*)

```
g3 = Show[{p18, p17, p6, p2, p1},
  DisplayFunction -> Identity];
g4 = Show[{p5, p4, p3},
  DisplayFunction -> Identity];
g5 = Show[{p16, p15, p14},
  DisplayFunction -> Identity];
```

(\* Display Genelets, Angular Distances and Selected Genelets \*)

```
Show[GraphicsArray[{g1, g2}],
  GraphicsSpacing -> -0.18];
```

(a) Arrays

(b) Angular Distance

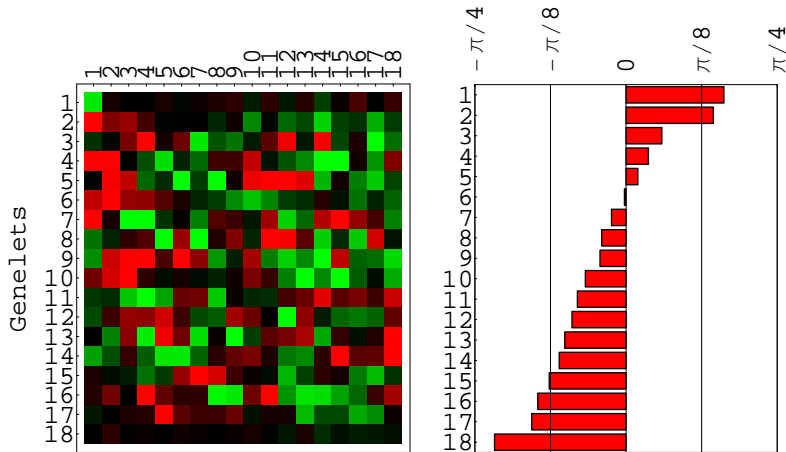

```
Show[GraphicsArray[{g4, g5, g3}],
  GraphicsSpacing -> -0.12];
```

(a) Arrays

(b) Arrays

(c) Arrays

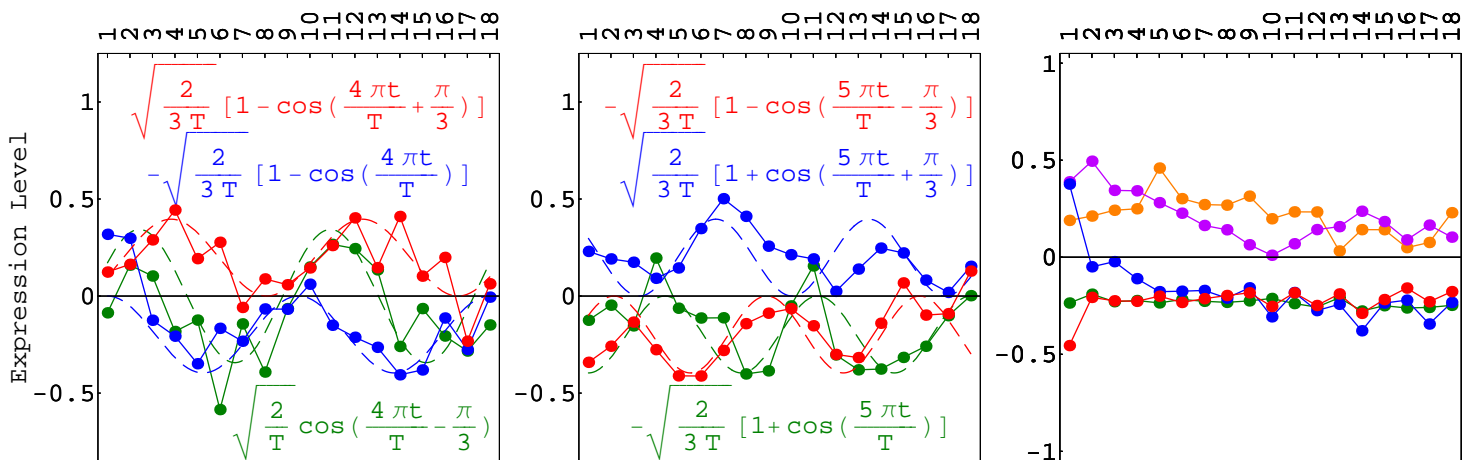

```
(* Create Yeast Generalized Fractions Bar Chart Display *)
```

```
d = Table[d1[[a, a]], {a, 1, arrays}];  
fractions = d^2 / Sum[d[[a]]^2, {a, 1, arrays}];  
coordinates = Sort[Table[{fractions[[a]], a}, {a, 1, arrays}], OrderedQ[{{#2}, {#1}}] &];  
fractions = Flatten[TakeColumns[coordinates, {1, 1}]];  
entropy = -N[Sum[fractions[[a]] * Log[fractions[[a]]], {a, 1, arrays}] / Log[arrays];  
entropy = N[Round[100 * entropy] / 100]
```

```
0.36
```

```
fractions[[3]]
```

```
0.0516352
```

```
limit = 0.052;
```

```
Clear[gridx, framex, framey, sizes];  
gridx = Table[a, {a, 0, limit, N[limit/4]}];  
framex = gridx;  
sizes = Flatten[  
  Table[  
    Dimensions[  
      Characters[  
        ToString[framex[[a]]  
      ]], {a, 1, 5}];  
size = Sort[sizes, OrderedQ[{{#2}, {#1}}] &][[1]];  
Do[  
  Do[framex[[a]] = StringJoin[ToString[framex[[a]]], " "],  
    {b, 1, 7 - sizes[[a]]}],  
  {a, 1, 5};  
framex = Table[{gridx[[a]], framex[[a]]}, {a, 1, 5};  
gridx = Table[{gridx[[a]], RGBColor[0, 0, 0]}, {a, 1, 5};  
framey = Flatten[TakeColumns[coordinates, {2, 2}]];  
framey = Table[{arrays - a, framey[[a + 1]]}, {a, 2, arrays - 1}];  
table = Table[fractions[[arrays - a]], {a, 0, arrays - 3};  
g = BarChart[table,  
  BarOrientation -> Horizontal,  
  PlotRange -> {{0, limit * 1.0001}, {0.5, arrays - 2 + 0.5}},  
  AspectRatio -> 1,  
  Axes -> False,  
  Frame -> True,  
  FrameTicks -> {None, framey, framex, None},  
  FrameLabel -> {None, None, None, None},  
  GridLines -> {gridx, None},  
  DisplayFunction -> Identity];  
g = FullGraphics[g];  
g[[1, 2]] = g[[1, 2]] /.  
  Text[a_, {b_, c_}, {0., -1.}] ->  
  Text[a, {b, c + 3}, {0, 0}, {0, 1}];  
g1 = Show[g,  
  AspectRatio -> 1.25,  
  PlotRange -> All,  
  DisplayFunction -> Identity];
```

```

fractions[[1]]
0.738543

limit = 0.8;

Clear[gridx, framex, framey, sizes];
gridx = Table[a, {a, 0, limit, N[limit/5]}];
framex = gridx;
sizes = Flatten[
  Table[
    Dimensions[
      Characters[
        ToString[framex[[a]]
      ]], {a, 1, 6}]]];
size = Sort[sizes, OrderedQ[{{#2, #1}} &][[1]] + 1];
Do[
  Do[framex[[a]] = StringJoin[ToString[framex[[a]]], " "],
    {b, 1, size - sizes[[a]]},
  {a, 1, 6}];
framex = Table[{gridx[[a]], framex[[a]]}, {a, 1, 6}];
framey = Flatten[TakeColumns[coordinates, {2, 2}]];
framey = Table[{arrays - a, framey[[a + 1]]}, {a, 0, arrays - 1}];
labely = "Genelets";
labelx = ColumnForm[
  {"(a) Generalized Fraction", " of Eigenexpression", StringJoin["D1 = ", ToString[entropy]], " "},
  Center];
g = BarChart[
  Table[fractions[[arrays - a]], {a, 0, arrays - 1}],
  BarOrientation -> Horizontal,
  PlotRange -> {{0, limit * 1.0001}, {0.5, arrays + 0.5}},
  AspectRatio -> 1,
  Axes -> False,
  Frame -> True,
  FrameTicks -> {None, framey, framex, None},
  FrameLabel -> {None, labely, labelx, None},
  GridLines -> {gridx, None},
  DisplayFunction -> Identity];
g = FullGraphics[g];
g[[1, 2]] = g[[1, 2]] /.
  Text[labely, {b_, c_}, {1., 0.}] ->
  Text[labely, {b - 0.16, c}, {0, 0}, {0, 1}];
g[[1, 2]] = g[[1, 2]] /.
  Text[labelx, {b_, c_}, {0., -1.}] ->
  Text[labelx, {b, c + 2}, {0, -1}, {1, 0}];
g[[1, 2]] = g[[1, 2]] /.
  Text[a_, {b_, c_}, {0., -1.}] ->
  Text[a, {b, c + 1.75}, {0, 0}, {0, 1}];
g5 = Show[{g,
  Graphics[{RGBColor[1, 1, 0.8], Rectangle[{0.1, 0.6}, {0.78, 16.5}]},
  Graphics[{Rectangle[{0.1, 0.6}, {0.78, 17}, g1]}]},
  AspectRatio -> 1.15,
  PlotRange -> All,
  DisplayFunction -> Identity];

```

```
(* Create Human Generalized Fractions Bar Chart Display *)
```

```
d = Table[d2[[a, a]], {a, 1, arrays}];  
fractions = d^2 / Sum[d[[a]]^2, {a, 1, arrays}];  
coordinates = Sort[Table[{fractions[[a]], a}, {a, 1, arrays}], OrderedQ[{{#2}, {#1}}] &];  
fractions = Flatten[TakeColumns[coordinates, {1, 1}]];  
entropy = -N[Sum[fractions[[a]] * Log[fractions[[a]]], {a, 1, arrays}] / Log[arrays];  
entropy = N[Round[100 * entropy] / 100]
```

```
0.12
```

```
fractions[[2]]
```

```
0.0148912
```

```
limit = 0.016;
```

```
Clear[gridx, framex, framey, sizes];  
gridx = Table[a, {a, 0, limit, N[limit/4]}];  
framex = gridx;  
sizes = Flatten[  
  Table[  
    Dimensions[  
      Characters[  
        ToString[framex[[a]]  
      ]], {a, 1, 5}];  
size = Sort[sizes, OrderedQ[{{#2}, {#1}}] &][[1]];  
Do[  
  Do[framex[[a]] = StringJoin[ToString[framex[[a]]], " "],  
    {b, 1, 7 - sizes[[a]]},  
    {a, 1, 5};  
framex = Table[{gridx[[a]], framex[[a]]}, {a, 1, 5};  
gridx = Table[{gridx[[a]], RGBColor[0, 0, 0]}, {a, 1, 5};  
framey = Flatten[TakeColumns[coordinates, {2, 2}]];  
framey = Table[{arrays - a, framey[[a + 1]]}, {a, 1, arrays - 1}];  
table = Table[fractions[[arrays - a]], {a, 0, arrays - 2};  
g = BarChart[table,  
  BarOrientation -> Horizontal,  
  PlotRange -> {{0, limit * 1.0001}, {0.5, arrays - 1 + 0.5}},  
  AspectRatio -> 1,  
  Axes -> False,  
  Frame -> True,  
  FrameTicks -> {None, framey, framex, None},  
  FrameLabel -> {None, None, None, None},  
  GridLines -> {gridx, None},  
  DisplayFunction -> Identity];  
g = FullGraphics[g];  
g[[1, 2]] = g[[1, 2]] /.  
  Text[a_, {b_, c_}, {0., -1.}] ->  
  Text[a, {b, c + 3}, {0, 0}, {0, 1}];  
g1 = Show[g,  
  AspectRatio -> 1.25,  
  PlotRange -> All,  
  DisplayFunction -> Identity];
```

```

fractions[[1]]
0.945012

limit = 1;

Clear[gridx, framex, framey, sizes];
gridx = Table[a, {a, 0, limit, N[limit/5]};
framex = gridx;
sizes = Flatten[
  Table[
    Dimensions[
      Characters[
        ToString[framex[[a]]
      ]], {a, 1, 6}]]];
size = Sort[sizes, OrderedQ[{{#2, #1}} &][[1]] + 2];
Do[
  Do[framex[[a]] = StringJoin[ToString[framex[[a]]], " "],
    {b, 1, size - sizes[[a]]},
  {a, 1, 6}];
framex = Table[{gridx[[a]], framex[[a]]}, {a, 1, 6}];
framey = Flatten[TakeColumns[coordinates, {2, 2}]];
framey = Table[{arrays - a, framey[[a + 1]]}, {a, 0, arrays - 1}];
labely = " ";
labelx = ColumnForm[
  {"(b) Generalized Fraction", " of Eigenexpression", StringJoin["D2 = ", ToString[entropy]], " "},
  Center];
g = BarChart[
  Table[fractions[[arrays - a]], {a, 0, arrays - 1}],
  BarOrientation -> Horizontal,
  PlotRange -> {{0, limit * 1.0001}, {0.5, arrays + 0.5}},
  AspectRatio -> 1,
  Axes -> False,
  Frame -> True,
  FrameTicks -> {None, framey, framex, None},
  FrameLabel -> {None, labely, labelx, None},
  GridLines -> {gridx, None},
  DisplayFunction -> Identity];
g = FullGraphics[g];
g[[1, 2]] = g[[1, 2]] /.
  Text[labely, {b_, c_}, {1., 0.}] ->
  Text[labely, {b - 0.16, c}, {0, 0}, {0, 1}];
g[[1, 2]] = g[[1, 2]] /.
  Text[labelx, {b_, c_}, {0., -1.}] ->
  Text[labelx, {b, c + 2}, {0, -1}, {1, 0}];
g[[1, 2]] = g[[1, 2]] /.
  Text[a_, {b_, c_}, {0., -1.}] ->
  Text[a, {b, c + 1.75}, {0, 0}, {0, 1}];
g6 = Show[{g,
  Graphics[{RGBColor[1, 1, 0.8], Rectangle[{0.1, 0.6}, {0.98, 17}]}],
  Graphics[{Rectangle[{0.1, 0.6}, {0.98, 17.5}, g1}]}],
  AspectRatio -> 1.15,
  PlotRange -> All,
  DisplayFunction -> Identity];

```



(\* Display Yeast and Human Generalized Fractions \*)

```
Show[GraphicsArray[{g5, g6}],
GraphicsSpacing -> -0.15];
```

(a) Generalized Fraction  
of Eigenexpression  
 $D_1 = 0.36$

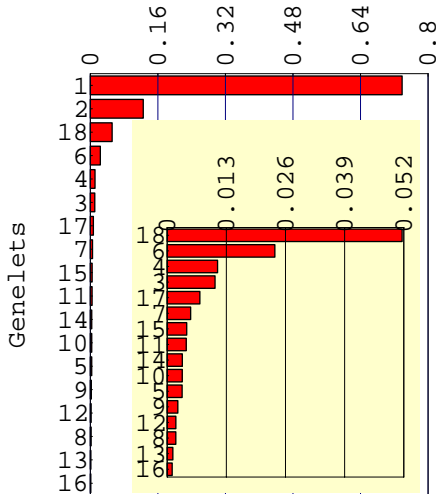

(b) Generalized Fraction  
of Eigenexpression  
 $D_2 = 0.12$

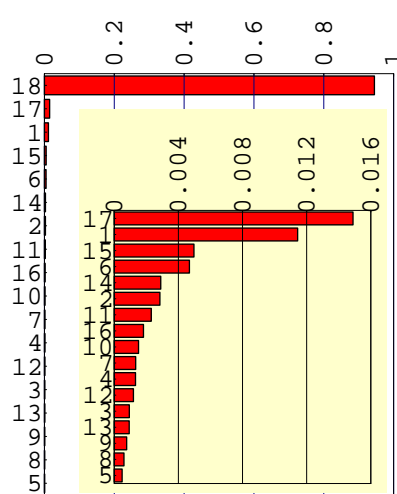

(\* Save Arraylets Data in Arraylets.txt \*)

(\* Save Yeast Arraylets \*)

```
{genes, arrays} = Dimensions[arraylets1];
savematrix = AppendRows[genenames1, N[Round[arraylets1 * 100000] / 100000]];
savematrix = AppendColumns[
AppendRows[
{"YORF", "NAME", "PROCESS", "FUNCTION",
"MICROARRAY_CLASSIFICATION", "TRADITIONAL_CLASSIFICATION"}],
{Table[a, {a, 1, arrays}]}],
savematrix];
stream = OpenWrite[
StringJoin[name, ":Desktop Folder:PNAS Data:Yeast_Arraylets.txt"],
PageWidth -> Infinity];
Write[stream, OutputForm[
TableForm[savematrix, TableSpacing -> {0, 1}]]];
Close[stream];
```

(\* Save Human Arraylets \*)

```
{genes, arrays} = Dimensions[arraylets2];
savematrix = AppendRows[genenames2, N[Round[arraylets2 * 100000] / 100000]];
savematrix = AppendColumns[
AppendRows[
{"CLID", "SYMBOL", "NAME",
"MICROARRAY_CLASSIFICATION", "TRADITIONAL_CLASSIFICATION"}],
{Table[a, {a, 1, arrays}]}],
savematrix];
stream = OpenWrite[
StringJoin[name, ":Desktop Folder:PNAS Data:Human_Arraylets.txt"],
PageWidth -> Infinity];
Write[stream, OutputForm[
TableForm[savematrix, TableSpacing -> {0, 1}]]];
Close[stream];
```

(\* Estimate Significance of Association of Genelets and Arraylets with the Cell Cycle \*)

(\* Display Sorted Yeast Arraylets \*)

```
genes = genes1;
genenames = genenames1;
arraynames = arraynames1;
arraylets = Transpose[arraylets1];
```

(\* Sort Selected Yeast Arraylets \*)

```
arraylets[[3]] = Sort[arraylets[[3]], OrderedQ[{{#2}, {#1}}] &];
arraylets[[4]] = Sort[arraylets[[4]], OrderedQ[{{#2}, {#1}}] &];
arraylets[[5]] = Sort[arraylets[[5]], OrderedQ[{{#2}, {#1}}] &];
arraylets[[14]] = Sort[arraylets[[14]], OrderedQ[{{#2}, {#1}}] &];
arraylets[[15]] = Sort[arraylets[[15]], OrderedQ[{{#2}, {#1}}] &];
arraylets[[16]] = Sort[arraylets[[16]], OrderedQ[{{#2}, {#1}}] &];
```

(\* Create Selected Sorted Yeast Arraylets Graph Display \*)

```
labelx = "Expression Level";
labely = ColumnForm[
  {" ", "(a) Number of Genes", " ", " ", " ", " ", " ", " ", " ", " ", " ", " "},
  Center];
framex = {{-0.05, "-0.05  "}, {0, "0      "}, {0.05, "0.05  "}, {0.1, "0.1   "},
  {0.15, "0.15  "}, {0.2, "0.2   "}, {0.25, "0.25  "}, {0.3, "0.3   "},
  {0.35, "0.35  "}, {0.4, "0.4   "}, {0.45, "0.45  "}};
framey = {{-100, "100"}, {-2250, "2250"}, {-genes + 100, "4423"}};
coordinates = Table[
  If[arraylets[[3, a]] < -0.05, -0.05,
  If[arraylets[[3, a]] > 0.3, 0.3, arraylets[[3, a]]],
  {a, 1, genes}];
coordinates = Table[{coordinates[[a]], -a + 1}, {a, 1, genes}];
line = Line[coordinates];
g = Show[
  Graphics[{RGBColor[1, 0, 0], line}],
  Frame -> True,
  FrameLabel -> {None, labely, labelx, None},
  FrameTicks -> {None, framey, framex, None},
  GridLines -> {{{0, RGBColor[0, 0, 0]}, {-100, RGBColor[0, 0, 0]},
  {-2250, RGBColor[0, 0, 0]}, {-genes + 100, RGBColor[0, 0, 0]}},
  PlotRange -> {{-0.05, 0.3001}, {135, -genes + 1 - 135}},
  DisplayFunction -> Identity];
g = FullGraphics[g];
g[[1, 2]] = g[[1, 2]] /.
  Text[labely, {b_, c_}, {1., 0.}] ->
  Text[labely, {b, c}, {0, 0}, {0, 1}];
g[[1, 2]] = g[[1, 2]] /.
  Text[labelx, {b_, c_}, {0., -1.}] ->
  Text[labelx, {b, c + 1300}, {0, -1}, {1, 0}];
g[[1, 2]] = g[[1, 2]] /.
  Text[a_, {b_, c_}, {0., -1.}] ->
  Text[a, {b, c + 800}, {0, 0}, {0, 1}];
p3 = Show[g,
  AspectRatio -> 1 / 1.6 / GoldenRatio,
  PlotRange -> All,
  DisplayFunction -> Identity];
```

```

labelx = "Expression Level";
labely = ColumnForm[
  {" ", "(a) Number of Genes", " ", " ", " ", " ", " ", " ", " ", " ", " ", " "},
  Center];
framex = {{-0.05, "-0.05"}, {0, "0"}, {0.05, "0.05"}, {0.1, "0.1"},
  {0.15, "0.15"}, {0.2, "0.2"}, {0.25, "0.25"}, {0.3, "0.3"},
  {0.35, "0.35"}, {0.4, "0.4"}, {0.45, "0.45"}};
framey = {{-100, "100"}, {-2250, "2250"}, {-genes + 100, "4423"}};
coordinates = Table[
  If[arraylets[[4, a]] + 0.05 < -0.05, -0.05,
  If[arraylets[[4, a]] + 0.05 > 0.3, 0.3, arraylets[[4, a]] + 0.05]],
  {a, 1, genes}];
coordinates = Table[{coordinates[[a]], -a + 1}, {a, 1, genes}];
line = Line[coordinates];
g = Show[
  Graphics[{RGBColor[1, 0.5, 0], line}],
  Frame -> True,
  FrameLabel -> {None, labely, labelx, None},
  FrameTicks -> {None, framey, framex, None},
  GridLines -> {{{0.05, RGBColor[0, 0, 0]}, {-100, RGBColor[0, 0, 0]},
  {-2250, RGBColor[0, 0, 0]}, {-genes + 100, RGBColor[0, 0, 0]}},
  PlotRange -> {{-0.05, 0.3001}, {135, -genes + 1 - 135}},
  DisplayFunction -> Identity];
g = FullGraphics[g];
g[[1, 2]] = g[[1, 2]] /.
  Text[labely, {b_, c_}, {1., 0.}] ->
  Text[labely, {b, c}, {0, 0}, {0, 1}];
g[[1, 2]] = g[[1, 2]] /.
  Text[labelx, {b_, c_}, {0., -1.}] ->
  Text[labelx, {b, c + 1300}, {0, -1}, {1, 0}];
g[[1, 2]] = g[[1, 2]] /.
  Text[a_, {b_, c_}, {0., -1.}] ->
  Text[a, {b, c + 800}, {0, 0}, {0, 1}];
p4 = Show[g,
  AspectRatio -> 1 / 1.6 / GoldenRatio,
  PlotRange -> All,
  DisplayFunction -> Identity];

```

```

labelx = "Expression Level";
labeled = ColumnForm[
  {" ", "(a) Number of Genes", " ", " ", " ", " ", " ", " ", " ", " ", " ", " "},
  Center];
framex = {{-0.05, "-0.05"}, {0, "0"}, {0.05, "0.05"}, {0.1, "0.1"},
  {0.15, "0.15"}, {0.2, "0.2"}, {0.25, "0.25"}, {0.3, "0.3"},
  {0.35, "0.35"}, {0.4, "0.4"}, {0.45, "0.45"};
framey = {{-100, "100"}, {-2250, "2250"}, {-genes + 100, "4423"}};
coordinates = Table[
  If[arraylets[[5, a]] + 0.1 < -0.05, -0.05,
  If[arraylets[[5, a]] + 0.1 > 0.3, 0.3, arraylets[[5, a]] + 0.1]],
  {a, 1, genes}];
coordinates = Table[{coordinates[[a]], -a + 1}, {a, 1, genes}];
line = Line[coordinates];
g = Show[
  Graphics[{RGBColor[0, 0.5, 0], line}],
  Frame -> True,
  FrameLabel -> {None, labeled, labelx, None},
  FrameTicks -> {None, framey, framex, None},
  GridLines -> {{{0.1, RGBColor[0, 0, 0]}, {-100, RGBColor[0, 0, 0]},
  {-2250, RGBColor[0, 0, 0]}, {-genes + 100, RGBColor[0, 0, 0]}},
  PlotRange -> {{-0.05, 0.3001}, {135, -genes + 1 - 135}},
  DisplayFunction -> Identity];
g = FullGraphics[g];
g[[1, 2]] = g[[1, 2]] /.
  Text[labeled, {b_, c_}, {1., 0.}] ->
  Text[labeled, {b, c}, {0, 0}, {0, 1}];
g[[1, 2]] = g[[1, 2]] /.
  Text[labelx, {b_, c_}, {0., -1.}] ->
  Text[labelx, {b, c + 1300}, {0, -1}, {1, 0}];
g[[1, 2]] = g[[1, 2]] /.
  Text[a_, {b_, c_}, {0., -1.}] ->
  Text[a, {b, c + 800}, {0, 0}, {0, 1}];
p5 = Show[g,
  AspectRatio -> 1 / 1.6 / GoldenRatio,
  PlotRange -> All,
  DisplayFunction -> Identity];

```

```

labelx = "Expression Level";
labely = ColumnForm[
  {" ", "(a) Number of Genes", " ", " ", " ", " ", " ", " ", " ", " ", " ", " "},
  Center];
framex = {{-0.05, "-0.05  "}, {0, "0      "}, {0.05, "0.05  "}, {0.1, "0.1    "},
  {0.15, "0.15  "}, {0.2, "0.2    "}, {0.25, "0.25  "}, {0.3, "0.3    "},
  {0.35, "0.35  "}, {0.4, "0.4    "}, {0.45, "0.45  "}};
framey = {{-100, "100"}, {-2250, "2250"}, {-genes + 100, "4423"}};
coordinates = Table[
  If[arraylets[[14, a]] + 0.15 < -0.05, -0.05,
  If[arraylets[[14, a]] + 0.15 > 0.3, 0.3, arraylets[[14, a]] + 0.15]],
  {a, 1, genes}];
coordinates = Table[{coordinates[[a]], -a + 1}, {a, 1, genes}];
line = Line[coordinates];
g = Show[
  Graphics[{RGBColor[0, 0, 1], line}],
  Frame -> True,
  FrameLabel -> {None, labely, labelx, None},
  FrameTicks -> {None, framey, framex, None},
  GridLines -> {{{0.15, RGBColor[0, 0, 0]}}, {{-100, RGBColor[0, 0, 0]}},
  {-2250, RGBColor[0, 0, 0]}}, {-genes + 100, RGBColor[0, 0, 0]}},
  PlotRange -> {{-0.05, 0.3001}, {135, -genes + 1 - 135}},
  DisplayFunction -> Identity];
g = FullGraphics[g];
g[[1, 2]] = g[[1, 2]] /.
  Text[labely, {b_, c_}, {1., 0.}] ->
  Text[labely, {b, c}, {0, 0}, {0, 1}];
g[[1, 2]] = g[[1, 2]] /.
  Text[labelx, {b_, c_}, {0., -1.}] ->
  Text[labelx, {b, c + 1300}, {0, -1}, {1, 0}];
g[[1, 2]] = g[[1, 2]] /.
  Text[a_, {b_, c_}, {0., -1.}] ->
  Text[a, {b, c + 800}, {0, 0}, {0, 1}];
p14 = Show[g,
  AspectRatio -> 1 / 1.6 / GoldenRatio,
  PlotRange -> All,
  DisplayFunction -> Identity];

```

```

labelx = "Expression Level";
labely = ColumnForm[
  {" ", "(a) Number of Genes", " ", " ", " ", " ", " ", " ", " ", " ", " ", " "},
  Center];
framex = {{-0.05, "-0.05  "}, {0, "0      "}, {0.05, "0.05  "}, {0.1, "0.1    "},
  {0.15, "0.15  "}, {0.2, "0.2    "}, {0.25, "0.25  "}, {0.3, "0.3    "},
  {0.35, "0.35  "}, {0.4, "0.4    "}, {0.45, "0.45  "}};
framey = {{-100, "100"}, {-2250, "2250"}, {-genes + 100, "4423"}};
coordinates = Table[
  If[arraylets[[15, a]] + 0.2 < -0.05, -0.05,
  If[arraylets[[15, a]] + 0.2 > 0.3, 0.3, arraylets[[15, a]] + 0.2]],
  {a, 1, genes}];
coordinates = Table[{coordinates[[a]], -a + 1}, {a, 1, genes}];
line = Line[coordinates];
g = Show[
  Graphics[{RGBColor[0.75, 0, 1], line}],
  Frame -> True,
  FrameLabel -> {None, labely, labelx, None},
  FrameTicks -> {None, framey, framex, None},
  GridLines -> {{{0.2, RGBColor[0, 0, 0]}, {-100, RGBColor[0, 0, 0]}},
  {-2250, RGBColor[0, 0, 0]}, {-genes + 100, RGBColor[0, 0, 0]}}},
  PlotRange -> {{-0.05, 0.3001}, {135, -genes + 1 - 135}},
  DisplayFunction -> Identity];
g = FullGraphics[g];
g[[1, 2]] = g[[1, 2]] /.
  Text[labely, {b_, c_}, {1., 0.}] ->
  Text[labely, {b, c}, {0, 0}, {0, 1}];
g[[1, 2]] = g[[1, 2]] /.
  Text[labelx, {b_, c_}, {0., -1.}] ->
  Text[labelx, {b, c + 1300}, {0, -1}, {1, 0}];
g[[1, 2]] = g[[1, 2]] /.
  Text[a_, {b_, c_}, {0., -1.}] ->
  Text[a, {b, c + 800}, {0, 0}, {0, 1}];
p15 = Show[g,
  AspectRatio -> 1 / 1.6 / GoldenRatio,
  PlotRange -> All,
  DisplayFunction -> Identity];

```

```

labelx = "Expression Level";
labely = ColumnForm[
  {" ", "(a) Number of Genes", " ", " ", " ", " ", " ", " ", " ", " ", " ", " "},
  Center];
framex = {{-0.05, "-0.05"}, {0, "0"}, {0.05, "0.05"}, {0.1, "0.1"},
  {0.15, "0.15"}, {0.2, "0.2"}, {0.25, "0.25"}, {0.3, "0.3"},
  {0.35, "0.35"}, {0.4, "0.4"}, {0.45, "0.45"};
framey = {{-100, "100"}, {-2250, "2250"}, {-genes + 100, "4423"}};
coordinates = Table[
  If[arraylets[[16, a]] + 0.25 < -0.05, -0.05,
  If[arraylets[[16, a]] + 0.25 > 0.3, 0.3, arraylets[[16, a]] + 0.25]],
  {a, 1, genes}];
coordinates = Table[{coordinates[[a]], -a + 1}, {a, 1, genes}];
line = Line[coordinates];
g = Show[
  Graphics[{RGBColor[1, 0, 0], line}],
  Frame -> True,
  FrameLabel -> {None, labely, labelx, None},
  FrameTicks -> {None, framey, framex, None},
  GridLines -> {{{0.25, RGBColor[0, 0, 0]}, {-100, RGBColor[0, 0, 0]}},
  {-2250, RGBColor[0, 0, 0]}, {-genes + 100, RGBColor[0, 0, 0]}},
  PlotRange -> {{-0.05, 0.3001}, {135, -genes + 1 - 135}},
  DisplayFunction -> Identity];
g = FullGraphics[g];
g[[1, 2]] = g[[1, 2]] /.
  Text[labely, {b_, c_}, {1., 0.}] ->
  Text[labely, {b, c}, {0, 0}, {0, 1}];
g[[1, 2]] = g[[1, 2]] /.
  Text[labelx, {b_, c_}, {0., -1.}] ->
  Text[labelx, {b, c + 1300}, {0, -1}, {1, 0}];
g[[1, 2]] = g[[1, 2]] /.
  Text[a_, {b_, c_}, {0., -1.}] ->
  Text[a, {b, c + 800}, {0, 0}, {0, 1}];
p16 = Show[g,
  AspectRatio -> 1 / 1.6 / GoldenRatio,
  PlotRange -> All,
  DisplayFunction -> Identity];

(* Display Selected Sorted Yeast Arraylets *)

g1 = Show[{p3, p4, p5, p14, p15, p16}];

```

```
(* Display Sorted Human Arraylets *)
```

```
genes = genes2;  
genenames = genenames2;  
arraynames = arraynames2;  
arraylets = Transpose[arraylets2];
```

```
(* Sort Selected Human Arraylets *)
```

```
arraylets[[3]] = Sort[arraylets[[3]], OrderedQ[{{#2}, {#1}}] &];  
arraylets[[4]] = Sort[arraylets[[4]], OrderedQ[{{#2}, {#1}}] &];  
arraylets[[5]] = Sort[arraylets[[5]], OrderedQ[{{#2}, {#1}}] &];  
arraylets[[14]] = Sort[arraylets[[14]], OrderedQ[{{#2}, {#1}}] &];  
arraylets[[15]] = Sort[arraylets[[15]], OrderedQ[{{#2}, {#1}}] &];  
arraylets[[16]] = Sort[arraylets[[16]], OrderedQ[{{#2}, {#1}}] &];
```

```
(* Create Selected Sorted Human Arraylets Graph Display *)
```

```
labelx = "Expression Level";  
labely = ColumnForm[  
  {" ", "(b) Number of Genes", " ", " ", " ", " ", " ", " ", " ", " ", " ", " "},  
  Center];  
framex = {{-0.05, "-0.05  "}, {0, "0      "}, {0.05, "0.05  "}, {0.1, "0.1   "},  
  {0.15, "0.15  "}, {0.2, "0.2   "}, {0.25, "0.25  "}, {0.3, "0.3   "},  
  {0.35, "0.35  "}, {0.4, "0.4   "}, {0.45, "0.45  "}};  
framey = {{-100, "100"}, {-6000, "6000"}, {-genes + 100, "11956"}};  
coordinates = Table[  
  If[arraylets[[3, a]] < -0.05, -0.05,  
  If[arraylets[[3, a]] > 0.3, 0.3, arraylets[[3, a]]],  
  {a, 1, genes}];  
coordinates = Table[{coordinates[[a]], -a + 1}, {a, 1, genes}];  
line = Line[coordinates];  
g = Show[  
  Graphics[{RGBColor[1, 0, 0], line}],  
  Frame -> True,  
  FrameLabel -> {None, labely, None, None},  
  FrameTicks -> {None, framey, None, None},  
  GridLines -> {{0, RGBColor[0, 0, 0]}, {-100, RGBColor[0, 0, 0]},  
    {-6000, RGBColor[0, 0, 0]}, {-genes + 100, RGBColor[0, 0, 0]}}},  
  PlotRange -> {{-0.05, 0.3001}, {360, -genes + 1 - 360}},  
  DisplayFunction -> Identity];  
g = FullGraphics[g];  
g[[1, 2]] = g[[1, 2]] /.  
  Text[labely, {b_, c_}, {1., 0.}] ->  
  Text[labely, {b, c}, {0, 0}, {0, 1}];  
g[[1, 2]] = g[[1, 2]] /.  
  Text[labelx, {b_, c_}, {0., -1.}] ->  
  Text[labelx, {b, c + 1400}, {0, -1}, {1, 0}];  
g[[1, 2]] = g[[1, 2]] /.  
  Text[a_, {b_, c_}, {0., -1.}] ->  
  Text[a, {b, c + 800}, {0, 0}, {0, 1}];  
p3 = Show[g,  
  AspectRatio -> 1 / GoldenRatio,  
  PlotRange -> All,  
  DisplayFunction -> Identity];
```



```

labelx = "Expression Level";
labely = ColumnForm[
  {" ", "(b) Number of Genes", " ", " ", " ", " ", " ", " ", " ", " ", " ", " "},
  Center];
framex = {{-0.05, "-0.05"}, {0, "0"}, {0.05, "0.05"}, {0.1, "0.1"},
  {0.15, "0.15"}, {0.2, "0.2"}, {0.25, "0.25"}, {0.3, "0.3"},
  {0.35, "0.35"}, {0.4, "0.4"}, {0.45, "0.45"};
framey = {{-100, "100"}, {-6000, "6000"}, {-genes + 100, "11956"}};
coordinates = Table[
  If[arraylets[[4, a]] + 0.05 < -0.05, -0.05,
  If[arraylets[[4, a]] + 0.05 > 0.3, 0.3, arraylets[[4, a]] + 0.05]],
  {a, 1, genes}];
coordinates = Table[{coordinates[[a]], -a + 1}, {a, 1, genes}];
line = Line[coordinates];
g = Show[
  Graphics[{RGBColor[1, 0.5, 0], line}],
  Frame -> True,
  FrameLabel -> {None, labely, None, None},
  FrameTicks -> {None, framey, None, None},
  GridLines -> {{{0.05, RGBColor[0, 0, 0]}, {-100, RGBColor[0, 0, 0]},
  {-6000, RGBColor[0, 0, 0]}, {-genes + 100, RGBColor[0, 0, 0]}},
  PlotRange -> {{-0.05, 0.3001}, {360, -genes + 1 - 360}},
  DisplayFunction -> Identity];
g = FullGraphics[g];
g[[1, 2]] = g[[1, 2]] /.
  Text[labely, {b_, c_}, {1., 0.}] ->
  Text[labely, {b, c}, {0, 0}, {0, 1}];
g[[1, 2]] = g[[1, 2]] /.
  Text[labelx, {b_, c_}, {0., -1.}] ->
  Text[labelx, {b, c + 1400}, {0, -1}, {1, 0}];
g[[1, 2]] = g[[1, 2]] /.
  Text[a_, {b_, c_}, {0., -1.}] ->
  Text[a, {b, c + 800}, {0, 0}, {0, 1}];
p4 = Show[g,
  AspectRatio -> 1 / GoldenRatio,
  PlotRange -> All,
  DisplayFunction -> Identity];

```

```

labelx = "Expression Level";
labely = ColumnForm[
  {" ", "(b) Number of Genes", " ", " ", " ", " ", " ", " ", " ", " ", " ", " "},
  Center];
framex = {{-0.05, "-0.05"}, {0, "0"}, {0.05, "0.05"}, {0.1, "0.1"},
  {0.15, "0.15"}, {0.2, "0.2"}, {0.25, "0.25"}, {0.3, "0.3"},
  {0.35, "0.35"}, {0.4, "0.4"}, {0.45, "0.45"};
framey = {{-100, "100"}, {-6000, "6000"}, {-genes + 100, "11956"}};
coordinates = Table[
  If[arraylets[[5, a]] + 0.1 < -0.05, -0.05,
  If[arraylets[[5, a]] + 0.1 > 0.3, 0.3, arraylets[[5, a]] + 0.1]],
  {a, 1, genes}];
coordinates = Table[{coordinates[[a]], -a + 1}, {a, 1, genes}];
line = Line[coordinates];
g = Show[
  Graphics[{RGBColor[0, 0.5, 0], line}],
  Frame -> True,
  FrameLabel -> {None, labely, None, None},
  FrameTicks -> {None, framey, None, None},
  GridLines -> {{{0.1, RGBColor[0, 0, 0]}, {-100, RGBColor[0, 0, 0]},
  {-6000, RGBColor[0, 0, 0]}, {-genes + 100, RGBColor[0, 0, 0]}},
  PlotRange -> {{-0.05, 0.3001}, {360, -genes + 1 - 360}},
  DisplayFunction -> Identity];
g = FullGraphics[g];
g[[1, 2]] = g[[1, 2]] /.
  Text[labely, {b_, c_}, {1., 0.}] ->
  Text[labely, {b, c}, {0, 0}, {0, 1}];
g[[1, 2]] = g[[1, 2]] /.
  Text[labelx, {b_, c_}, {0., -1.}] ->
  Text[labelx, {b, c + 1400}, {0, -1}, {1, 0}];
g[[1, 2]] = g[[1, 2]] /.
  Text[a_, {b_, c_}, {0., -1.}] ->
  Text[a, {b, c + 800}, {0, 0}, {0, 1}];
p5 = Show[g,
  AspectRatio -> 1 / GoldenRatio,
  PlotRange -> All,
  DisplayFunction -> Identity];

```

```

labelx = "Expression Level";
labely = ColumnForm[
  {" ", "(b) Number of Genes", " ", " ", " ", " ", " ", " ", " ", " ", " ", " "},
  Center];
framex = {{-0.05, "-0.05  "}, {0, "0      "}, {0.05, "0.05  "}, {0.1, "0.1   "},
  {0.15, "0.15  "}, {0.2, "0.2   "}, {0.25, "0.25  "}, {0.3, "0.3   "},
  {0.35, "0.35  "}, {0.4, "0.4   "}, {0.45, "0.45  "}};
framey = {{-100, "100"}, {-6000, "6000"}, {-genes + 100, "11956"}};
coordinates = Table[
  If[arraylets[[14, a]] + 0.15 < -0.05, -0.05,
  If[arraylets[[14, a]] + 0.15 > 0.3, 0.3, arraylets[[14, a]] + 0.15]],
  {a, 1, genes}];
coordinates = Table[{coordinates[[a]], -a + 1}, {a, 1, genes}];
line = Line[coordinates];
g = Show[
  Graphics[{RGBColor[0, 0, 1], line}],
  Frame -> True,
  FrameLabel -> {None, labely, None, None},
  FrameTicks -> {None, framey, None, None},
  GridLines -> {{{0.15, RGBColor[0, 0, 0]}}, {{-100, RGBColor[0, 0, 0]}},
  {-6000, RGBColor[0, 0, 0]}}, {-genes + 100, RGBColor[0, 0, 0]}},
  PlotRange -> {{-0.05, 0.3001}, {360, -genes + 1 - 360}},
  DisplayFunction -> Identity];
g = FullGraphics[g];
g[[1, 2]] = g[[1, 2]] /.
  Text[labely, {b_, c_}, {1., 0.}] ->
  Text[labely, {b, c}, {0, 0}, {0, 1}];
g[[1, 2]] = g[[1, 2]] /.
  Text[labelx, {b_, c_}, {0., -1.}] ->
  Text[labelx, {b, c + 1400}, {0, -1}, {1, 0}];
g[[1, 2]] = g[[1, 2]] /.
  Text[a_, {b_, c_}, {0., -1.}] ->
  Text[a, {b, c + 800}, {0, 0}, {0, 1}];
p14 = Show[g,
  AspectRatio -> 1 / GoldenRatio,
  PlotRange -> All,
  DisplayFunction -> Identity];

```

```

labelx = "Expression Level";
labely = ColumnForm[
  {" ", "(b) Number of Genes", " ", " ", " ", " ", " ", " ", " ", " ", " ", " "},
  Center];
framex = {{-0.05, "-0.05  "}, {0, "0      "}, {0.05, "0.05  "}, {0.1, "0.1   "},
  {0.15, "0.15  "}, {0.2, "0.2   "}, {0.25, "0.25  "}, {0.3, "0.3   "},
  {0.35, "0.35  "}, {0.4, "0.4   "}, {0.45, "0.45  "}};
framey = {{-100, "100"}, {-6000, "6000"}, {-genes + 100, "11956"}};
coordinates = Table[
  If[arraylets[[15, a]] + 0.2 < -0.05, -0.05,
  If[arraylets[[15, a]] + 0.2 > 0.3, 0.3, arraylets[[15, a]] + 0.2]],
  {a, 1, genes}];
coordinates = Table[{coordinates[[a]], -a + 1}, {a, 1, genes}];
line = Line[coordinates];
g = Show[
  Graphics[{RGBColor[0.75, 0, 1], line}],
  Frame -> True,
  FrameLabel -> {None, labely, None, None},
  FrameTicks -> {None, framey, None, None},
  GridLines -> {{{0.2, RGBColor[0, 0, 0]}, {-100, RGBColor[0, 0, 0]},
  {-6000, RGBColor[0, 0, 0]}, {-genes + 100, RGBColor[0, 0, 0]}},
  PlotRange -> {{-0.05, 0.3001}, {360, -genes + 1 - 360}},
  DisplayFunction -> Identity];
g = FullGraphics[g];
g[[1, 2]] = g[[1, 2]] /.
  Text[labely, {b_, c_}, {1., 0.}] ->
  Text[labely, {b, c}, {0, 0}, {0, 1}];
g[[1, 2]] = g[[1, 2]] /.
  Text[labelx, {b_, c_}, {0., -1.}] ->
  Text[labelx, {b, c + 1400}, {0, -1}, {1, 0}];
g[[1, 2]] = g[[1, 2]] /.
  Text[a_, {b_, c_}, {0., -1.}] ->
  Text[a, {b, c + 800}, {0, 0}, {0, 1}];
p15 = Show[g,
  AspectRatio -> 1 / GoldenRatio,
  PlotRange -> All,
  DisplayFunction -> Identity];

```

```

labelx = "Expression Level";
labely = ColumnForm[
  {" ", "(b) Number of Genes", " ", " ", " ", " ", " ", " ", " ", " ", " ", " "},
  Center];
framex = {{-0.05, "-0.05  "}, {0, "0      "}, {0.05, "0.05  "}, {0.1, "0.1    "},
  {0.15, "0.15  "}, {0.2, "0.2    "}, {0.25, "0.25  "}, {0.3, "0.3    "},
  {0.35, "0.35  "}, {0.4, "0.4    "}, {0.45, "0.45  "}};
framey = {{-100, "100"}, {-6000, "6000"}, {-genes + 100, "11956"}};
coordinates = Table[
  If[arraylets[[16, a]] + 0.25 < -0.05, -0.05,
  If[arraylets[[16, a]] + 0.25 > 0.3, 0.3, arraylets[[16, a]] + 0.25]],
  {a, 1, genes}];
coordinates = Table[{coordinates[[a]], -a + 1}, {a, 1, genes}];
line = Line[coordinates];
g = Show[
  Graphics[{RGBColor[1, 0, 0], line}],
  Frame -> True,
  FrameLabel -> {None, labely, None, None},
  FrameTicks -> {None, framey, None, None},
  GridLines -> {{{0.25, RGBColor[0, 0, 0]}, {-100, RGBColor[0, 0, 0]}},
  {-6000, RGBColor[0, 0, 0]}, {-genes + 100, RGBColor[0, 0, 0]}}},
  PlotRange -> {{-0.05, 0.3001}, {360, -genes + 1 - 360}},
  DisplayFunction -> Identity];
g = FullGraphics[g];
g[[1, 2]] = g[[1, 2]] /.
  Text[labely, {b_, c_}, {1., 0.}] ->
  Text[labely, {b, c}, {0, 0}, {0, 1}];
g[[1, 2]] = g[[1, 2]] /.
  Text[labelx, {b_, c_}, {0., -1.}] ->
  Text[labelx, {b, c + 1400}, {0, -1}, {1, 0}];
g[[1, 2]] = g[[1, 2]] /.
  Text[a_, {b_, c_}, {0., -1.}] ->
  Text[a, {b, c + 800}, {0, 0}, {0, 1}];
p16 = Show[g,
  AspectRatio -> 1 / GoldenRatio,
  PlotRange -> All,
  DisplayFunction -> Identity];

(* Display Selected Sorted Human Arraylets *)

g2 = Show[{p3, p4, p5, p14, p15, p16}];

```

(\* Display Sorted Yeast and Human Selected Arraylets \*)

```
Show[{  
  Graphics[{Rectangle[{0, 0}, {5, 161}, g2]}],  
  Graphics[{Rectangle[{0, 166}, {5, 270}, g1]}]},  
PlotRange -> All];
```

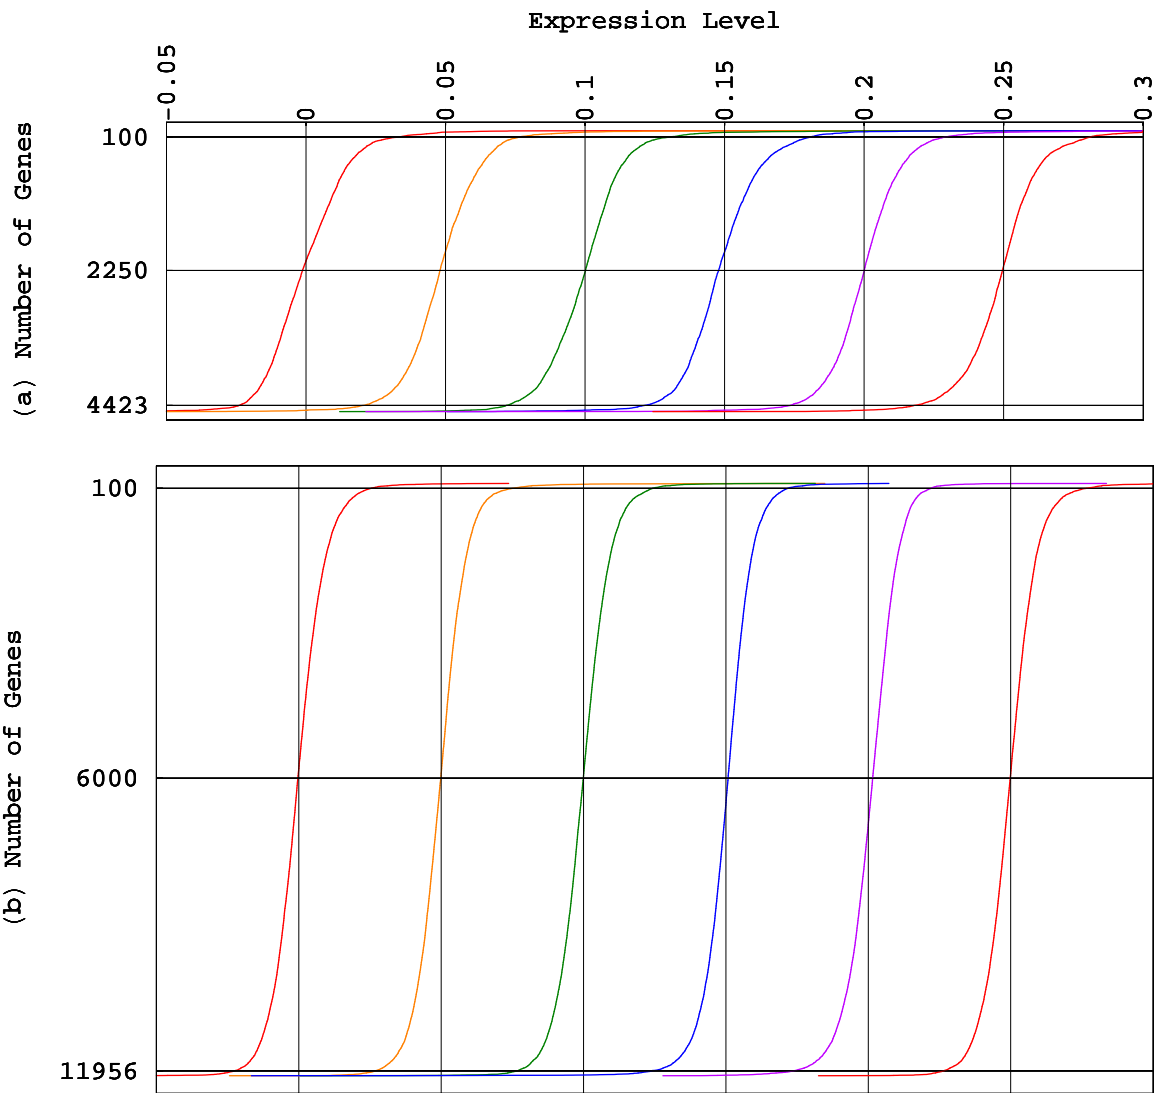

```
(* Calculate Significance of Cell Cycle Associations in Yeast *)
```

```
genes = genes1;  
arraynames = arraynames1;  
arraylets = arraylets1;
```

```
(* Use Microarray Classification of Yeast Genes *)
```

```
genenames = TakeColumns[genenames1, {5}];  
stages = {"M/G1", "G1", "S", "S/G2", "G2/M", "None"};  
numbers = Flatten[Table[{Count[Flatten[genenames], stages[[a]]]}, {a, 1, 6}]];  
genelet = {{3}, {4}, {5}, {14}, {15}, {16}};  
probability = Table[{0}, {a, 1, 6}];  
parallelannotation = Table[{0}, {a, 1, 6}];  
parallelprobability = Table[{0}, {a, 1, 6}];  
antiannotation = Table[{0}, {a, 1, 6}];  
antiprobability = Table[{0}, {a, 1, 6}];  
  
Do[{  
  arraylet = TakeColumns[Sort[  
    AppendRows[TakeColumns[arraylets, genelet[[c]], genenames],  
    OrderedQ[{{#2}, {#1}}] &], {2}],  
  table = Table[{  
    stages[[a]],  
    numbers[[a]],  
    Count[Flatten[TakeRows[arraylet, {1, 100}]], stages[[a]]],  
    {a, 1, 6}],  
  probability = Table[{  
    Sum[N[Binomial[table[[a, 2]], b] * Binomial[genes - table[[a, 2]], 100 - b] /  
      Binomial[genes, 100]], {b, table[[a, 3]], 100}],  
    stages[[a]]],  
    {a, 1, 6}],  
  parallelannotation[[c]] = {Sort[probability, OrderedQ[{{#1}, {#2}}] &][[1, 2]]},  
  parallelprobability[[c]] = {ScientificForm[Sort[probability, OrderedQ[{{#1}, {#2}}] &][[1, 1]], 2}},  
  table = Table[{  
    stages[[a]],  
    numbers[[a]],  
    Count[Flatten[TakeRows[arraylet, {genes - 99, genes}]], stages[[a]]],  
    {a, 1, 6}],  
  probability = Table[{  
    Sum[N[Binomial[table[[a, 2]], b] * Binomial[genes - table[[a, 2]], 100 - b] /  
      Binomial[genes, 100]], {b, table[[a, 3]], 100}],  
    stages[[a]]],  
    {a, 1, 6}],  
  antiannotation[[c]] = {Sort[probability, OrderedQ[{{#1}, {#2}}] &][[1, 2]]},  
  antiprobability[[c]] = {ScientificForm[Sort[probability, OrderedQ[{{#1}, {#2}}] &][[1, 1]], 2}},  
  {c, 1, Dimensions[genelet][[1]]}]  
  
table1 = AppendRows[  
  genelet,  
  parallelannotation,  
  parallelprobability,  
  antiannotation,  
  antiprobability];
```

(\* Use Traditional Classification of Yeast Genes \*)

```
genenames = TakeColumns[genenames1, {6}];
stages = {"M/G1", "G1", "S", "S/G2", "G2/M", "None"};
numbers = Flatten[Table[{Count[Flatten[genenames], stages[[a]]]}, {a, 1, 6}]];
genelet = {{3}, {4}, {5}, {14}, {15}, {16}};
probability = Table[{0}, {a, 1, 6}];
parallelannotation = Table[{0}, {a, 1, 6}];
parallelprobability = Table[{0}, {a, 1, 6}];
antiannotation = Table[{0}, {a, 1, 6}];
antiprobability = Table[{0}, {a, 1, 6}];

Do[{
  arraylet = TakeColumns[Sort[
    AppendRows[TakeColumns[arraylets, genelet[[c]], genenames],
    OrderedQ[{{#2}, {#1}}] &], {2}],
  table = Table[{
    stages[[a]],
    numbers[[a]],
    Count[Flatten[TakeRows[arraylet, {1, 100}]], stages[[a]]],
    {a, 1, 6}],
  probability = Table[{
    Sum[N[Binomial[table[[a, 2]], b] * Binomial[genes - table[[a, 2]], 100 - b] /
      Binomial[genes, 100]], {b, table[[a, 3]], 100}],
    stages[[a]],
    {a, 1, 6}],
  parallelannotation[[c]] = {Sort[probability, OrderedQ[{{#1}, {#2}}] &][[1, 2]]},
  parallelprobability[[c]] = {ScientificForm[Sort[probability, OrderedQ[{{#1}, {#2}}] &][[1, 1]], 2}},
  table = Table[{
    stages[[a]],
    numbers[[a]],
    Count[Flatten[TakeRows[arraylet, {genes - 99, genes}]], stages[[a]]],
    {a, 1, 6}],
  probability = Table[{
    Sum[N[Binomial[table[[a, 2]], b] * Binomial[genes - table[[a, 2]], 100 - b] /
      Binomial[genes, 100]], {b, table[[a, 3]], 100}],
    stages[[a]],
    {a, 1, 6}],
  antiannotation[[c]] = {Sort[probability, OrderedQ[{{#1}, {#2}}] &][[1, 2]]},
  antiprobability[[c]] = {ScientificForm[Sort[probability, OrderedQ[{{#1}, {#2}}] &][[1, 1]], 2}},
  {c, 1, Dimensions[genelet][[1]]}]

table2 = AppendRows[
  genelet,
  parallelannotation,
  parallelprobability,
  antiannotation,
  antiprobability];
```



```
(* Calculate Significance of Cell Cycle Associations in Human *)
```

```
genes = genes2;  
arraynames = arraynames2;  
arraylets = arraylets2;
```

```
(* Use Microarray Classification of Human Genes *)
```

```
genenames = TakeColumns[genenames2, {4}];  
stages = {"M/G1", "G1/S", "S", "G2", "G2/M", "None"};  
numbers = Flatten[Table[{Count[Flatten[genenames], stages[[a]]]}, {a, 1, 6}]];  
genelet = {{3}, {4}, {5}, {14}, {15}, {16}};  
probability = Table[{0}, {a, 1, 6}];  
parallelannotation = Table[{0}, {a, 1, 6}];  
parallelprobability = Table[{0}, {a, 1, 6}];  
antiannotation = Table[{0}, {a, 1, 6}];  
antiprobability = Table[{0}, {a, 1, 6}];  
  
Do[{  
  arraylet = TakeColumns[Sort[  
    AppendRows[TakeColumns[arraylets, genelet[[c]], genenames],  
    OrderedQ[{{#2}, {#1}}] &], {2}],  
  table = Table[{  
    stages[[a]],  
    numbers[[a]],  
    Count[Flatten[TakeRows[arraylet, {1, 100}]], stages[[a]]],  
    {a, 1, 6}],  
  probability = Table[{  
    Sum[N[Binomial[table[[a, 2]], b] * Binomial[genes - table[[a, 2]], 100 - b] /  
      Binomial[genes, 100]], {b, table[[a, 3]], 100}],  
    stages[[a]]],  
    {a, 1, 6}],  
  parallelannotation[[c]] = {Sort[probability, OrderedQ[{{#1}, {#2}}] &][[1, 2]]},  
  parallelprobability[[c]] = {ScientificForm[Sort[probability, OrderedQ[{{#1}, {#2}}] &][[1, 1]], 2}},  
  table = Table[{  
    stages[[a]],  
    numbers[[a]],  
    Count[Flatten[TakeRows[arraylet, {genes - 99, genes}]], stages[[a]]],  
    {a, 1, 6}],  
  probability = Table[{  
    Sum[N[Binomial[table[[a, 2]], b] * Binomial[genes - table[[a, 2]], 100 - b] /  
      Binomial[genes, 100]], {b, table[[a, 3]], 100}],  
    stages[[a]]],  
    {a, 1, 6}],  
  antiannotation[[c]] = {Sort[probability, OrderedQ[{{#1}, {#2}}] &][[1, 2]]},  
  antiprobability[[c]] = {ScientificForm[Sort[probability, OrderedQ[{{#1}, {#2}}] &][[1, 1]], 2}},  
  {c, 1, Dimensions[genelet][[1]]}]  
  
table3 = AppendRows[  
  genelet,  
  parallelannotation,  
  parallelprobability,  
  antiannotation,  
  antiprobability];
```

(\* Use Traditional Classification of Human Genes \*)

```
genenames = TakeColumns[genenames2, {5}];
stages = {"M/G1", "G1/S", "S", "G2", "G2/M", "None"};
numbers = Flatten[Table[{Count[Flatten[genenames], stages[[a]]]}, {a, 1, 6}]];
genelet = {{3}, {4}, {5}, {14}, {15}, {16}};
probability = Table[{0}, {a, 1, 6}];
parallelannotation = Table[{0}, {a, 1, 6}];
parallelprobability = Table[{0}, {a, 1, 6}];
antiannotation = Table[{0}, {a, 1, 6}];
antiprobability = Table[{0}, {a, 1, 6}];

Do[{
  arraylet = TakeColumns[Sort[
    AppendRows[TakeColumns[arraylets, genelet[[c]], genenames],
    OrderedQ[{{#2}, {#1}}] &], {2}],
  table = Table[{
    stages[[a]],
    numbers[[a]],
    Count[Flatten[TakeRows[arraylet, {1, 100}]], stages[[a]]],
    {a, 1, 6}],
  probability = Table[{
    Sum[N[Binomial[table[[a, 2]], b] * Binomial[genes - table[[a, 2]], 100 - b] /
      Binomial[genes, 100]], {b, table[[a, 3]], 100}],
    stages[[a]],
    {a, 1, 6}],
  parallelannotation[[c]] = {Sort[probability, OrderedQ[{{#1}, {#2}}] &][[1, 2]]},
  parallelprobability[[c]] = {ScientificForm[Sort[probability, OrderedQ[{{#1}, {#2}}] &][[1, 1]], 2]},
  table = Table[{
    stages[[a]],
    numbers[[a]],
    Count[Flatten[TakeRows[arraylet, {genes - 99, genes}]], stages[[a]]],
    {a, 1, 6}],
  probability = Table[{
    Sum[N[Binomial[table[[a, 2]], b] * Binomial[genes - table[[a, 2]], 100 - b] /
      Binomial[genes, 100]], {b, table[[a, 3]], 100}],
    stages[[a]],
    {a, 1, 6}],
  antiannotation[[c]] = {Sort[probability, OrderedQ[{{#1}, {#2}}] &][[1, 2]]},
  antiprobability[[c]] = {ScientificForm[Sort[probability, OrderedQ[{{#1}, {#2}}] &][[1, 1]], 2]},
  {c, 1, Dimensions[genelet][[1]]}]

table4 = AppendRows[
  genelet,
  parallelannotation,
  parallelprobability,
  antiannotation,
  antiprobability];
```

(\* Display Significance of Association of Genelets and Arraylets with the Cell Cycle \*)

```

headerx = {{
  ColumnForm[{" ", " ", " "}, Left],
  ColumnForm[{" ", " ", "Dataset"}, Left],
  ColumnForm[{" ", " ", "Classification"}, Left],
  ColumnForm[{"Genelet", "and", "Arraylet"}, Left],
  ColumnForm[{"Most Likely", "Parallel", "Association"}, Left],
  ColumnForm[{"P-Value of", "Parallel", "Association"}, Left],
  ColumnForm[{"Most Likely", "Antiparallel", "Association"}, Left],
  ColumnForm[{"P-Value of", "Antiparallel", "Association"}, Left]},
{" ", " ", " ", " ", " ", " ", " ", " ", " ", " ", " "}};
spacerx = {" ", " ", " ", " ", " "};
headery = Table[" ", {a, 1, 27}, {b, 1, 3}];
headery[[1]] = {"(a)", "Yeast", "Microarray"};
headery[[8]] = {"(b)", " ", "Traditional"};
headery[[15]] = {"(c)", "Human", "Microarray"};
headery[[22]] = {"(d)", " ", "Traditional"};
association =
  AppendColumns[headerx,
  AppendRows[headery,
  AppendColumns[table1, spacerx, table2, spacerx, table3, spacerx, table4]]];
TableForm[association, TableSpacing -> {1, 1}]

```

|     | Dataset | Classification | Genelet<br>and<br>Arraylet | Most Likely<br>Parallel<br>Association | P-Value of<br>Parallel<br>Association | Most Likely<br>Antiparallel<br>Association | P-Value of<br>Antiparallel<br>Association |
|-----|---------|----------------|----------------------------|----------------------------------------|---------------------------------------|--------------------------------------------|-------------------------------------------|
| (a) | Yeast   | Microarray     | 3                          | G1                                     | $2.1 \times 10^{-49}$                 | G2/M                                       | $1.6 \times 10^{-18}$                     |
|     |         |                | 4                          | G2/M                                   | $2.9 \times 10^{-15}$                 | G1                                         | $1.1 \times 10^{-36}$                     |
|     |         |                | 5                          | M/G1                                   | $1.3 \times 10^{-36}$                 | S/G2                                       | $7.2 \times 10^{-8}$                      |
|     |         |                | 14                         | G2/M                                   | $8.8 \times 10^{-8}$                  | G1                                         | $2.6 \times 10^{-13}$                     |
|     |         |                | 15                         | S/G2                                   | $5.9 \times 10^{-7}$                  | G1                                         | $3.3 \times 10^{-14}$                     |
|     |         |                | 16                         | M/G1                                   | $6.6 \times 10^{-9}$                  | S                                          | $7.5 \times 10^{-3}$                      |
| (b) |         | Traditional    | 3                          | G1                                     | $1.7 \times 10^{-12}$                 | G2/M                                       | $1.9 \times 10^{-4}$                      |
|     |         |                | 4                          | M/G1                                   | $8.2 \times 10^{-6}$                  | G1                                         | $2.6 \times 10^{-22}$                     |
|     |         |                | 5                          | M/G1                                   | $1.2 \times 10^{-10}$                 | S                                          | $5.4 \times 10^{-4}$                      |
|     |         |                | 14                         | G2/M                                   | $1.9 \times 10^{-4}$                  | G1                                         | $2.2 \times 10^{-8}$                      |
|     |         |                | 15                         | G2/M                                   | $3.2 \times 10^{-3}$                  | G1                                         | $5.4 \times 10^{-14}$                     |
|     |         |                | 16                         | M/G1                                   | $2.6 \times 10^{-7}$                  | S                                          | $1.5 \times 10^{-5}$                      |
| (c) | Human   | Microarray     | 3                          | G2/M                                   | $5.6 \times 10^{-3}$                  | G1/S                                       | $7.9 \times 10^{-2}$                      |
|     |         |                | 4                          | S                                      | $8.2 \times 10^{-21}$                 | M/G1                                       | $1.3 \times 10^{-3}$                      |
|     |         |                | 5                          | G2/M                                   | $6.9 \times 10^{-8}$                  | G1/S                                       | $6.4 \times 10^{-5}$                      |
|     |         |                | 14                         | G2                                     | $3.3 \times 10^{-34}$                 | M/G1                                       | $1.3 \times 10^{-3}$                      |
|     |         |                | 15                         | G1/S                                   | $4. \times 10^{-37}$                  | G2                                         | $1.9 \times 10^{-37}$                     |
|     |         |                | 16                         | G2/M                                   | $2. \times 10^{-33}$                  | G1/S                                       | $3. \times 10^{-10}$                      |
| (d) |         | Traditional    | 3                          | G2/M                                   | $1. \times 10^{-1}$                   | S                                          | $3.2 \times 10^{-3}$                      |
|     |         |                | 4                          | S                                      | $1.5 \times 10^{-8}$                  | G1/S                                       | $7.6 \times 10^{-3}$                      |
|     |         |                | 5                          | G2                                     | $4.9 \times 10^{-2}$                  | G1/S                                       | $1.2 \times 10^{-1}$                      |
|     |         |                | 14                         | G2                                     | $6.6 \times 10^{-8}$                  | None                                       | $5.4 \times 10^{-1}$                      |
|     |         |                | 15                         | G1/S                                   | $2.1 \times 10^{-13}$                 | G2/M                                       | $2.1 \times 10^{-14}$                     |
|     |         |                | 16                         | G2/M                                   | $9. \times 10^{-17}$                  | S                                          | $1.1 \times 10^{-5}$                      |

```
(* Sort Yeast and Human Data in Common Cell Cycle Subspace *)
```

```
(* Approximate 6 D Subspace of Genelets with 2 D Subspace *)
```

```
(* Assume  $4\pi t/T \sim 5\pi t/T \rightarrow z$  *)
```

```
genelets3 = Sqrt[2/3/17] - Sqrt[2/3/17] * Cos[z + Pi/3];  
genelets4 = -Sqrt[2/3/17] + Sqrt[2/3/17] * Cos[z];  
genelets5 = Sqrt[2/17] * Cos[z - Pi/3];  
genelets14 = -Sqrt[2/3/17] + Sqrt[2/3/17] * Cos[z - Pi/3];  
genelets15 = Sqrt[2/3/17] + Sqrt[2/3/17] * Cos[z + Pi/3];  
genelets16 = -Sqrt[2/3/17] - Sqrt[2/3/17] * Cos[z];
```

```
(* Define 2 D Subspace {x,y}  $\equiv \{\sqrt{2/T} \cos(z), \sqrt{2/T} \sin(z)\}$  *)
```

```
(* Project 6 D Subspace of Genelets Onto 2 D Subspace *)
```

```
Clear[a1, a2, b1, b2, c1, c2];
```

```
Chop[
```

```
  Simplify[
```

```
    TrigExpand[
```

```
      (a1 * genelets3 + b1 * genelets4 + c1 * genelets5 +  
       a2 * genelets15 + b2 * genelets16 + c2 * genelets14) /  
      Sqrt[2/17]]]]
```

```

$$\frac{1}{6} (2\sqrt{3} (a1 + a2 - b1 - b2 - c2) +$$
  

$$(-\sqrt{3} a1 + \sqrt{3} a2 + 2\sqrt{3} b1 - 2\sqrt{3} b2 + 3 c1 + \sqrt{3} c2) \cos[z] + 3 (a1 - a2 + \sqrt{3} c1 + c2) \sin[z])$$

```

```
(* Sort Yeast Data *)
```

```
genes = genes1;
```

```
arraynames = arraynames1;
```

```
genenames = TakeColumns[genenames1, 1];
```

```
(* Sort Yeast Arrays *)
```

```
(* Center Genelets and Calculate Contributions of Arraylets to Arrays *)
```

```
arraycontributions3 = (genelets[[3]] - Sqrt[2/3/17.]) * d1[[3, 3]];  
arraycontributions4 = (genelets[[4]] + Sqrt[2/3/17.]) * d1[[4, 4]];  
arraycontributions5 = genelets[[5]] * d1[[5, 5]];  
arraycontributions14 = (genelets[[14]] + Sqrt[2/3/17.]) * d1[[14, 14]];  
arraycontributions15 = (genelets[[15]] - Sqrt[2/3/17.]) * d1[[15, 15]];  
arraycontributions16 = (genelets[[16]] + Sqrt[2/3/17.]) * d1[[16, 16]];
```

(\* Project Arrays from 6 D Arraylets Subspace Onto 2 D Subspace \*)

```
coordinates = Table[{
  (-Sqrt[3] * (arraycontributions3[[a]] - arraycontributions15[[a]]) +
    2 * Sqrt[3] * (arraycontributions4[[a]] - arraycontributions16[[a]]) +
    (3 * arraycontributions5[[a]] + Sqrt[3] * arraycontributions14[[a]])) / 6 /
  Sqrt[(arraycontributions3[[a]] - arraycontributions15[[a]])^2 / 3 +
    (arraycontributions4[[a]] - arraycontributions16[[a]])^2 / 3 +
    (arraycontributions5[[a]] + arraycontributions14[[a]] / Sqrt[3])^2 +
    Abs[(arraycontributions3[[a]] - arraycontributions15[[a]]) / Sqrt[3] *
      (arraycontributions4[[a]] - arraycontributions16[[a]]) / Sqrt[3] +
    Abs[(arraycontributions3[[a]] - arraycontributions15[[a]]) / Sqrt[3] *
      (arraycontributions5[[a]] + arraycontributions14[[a]] / Sqrt[3])] +
    Abs[(arraycontributions4[[a]] - arraycontributions16[[a]]) / Sqrt[3] *
      (arraycontributions5[[a]] + arraycontributions14[[a]] / Sqrt[3])]],
  (3 * (arraycontributions3[[a]] - arraycontributions15[[a]]) +
    Sqrt[3] * (3 * arraycontributions5[[a]] + Sqrt[3] * arraycontributions14[[a]])) / 6 /
  Sqrt[(arraycontributions3[[a]] - arraycontributions15[[a]])^2 / 3 +
    (arraycontributions4[[a]] - arraycontributions16[[a]])^2 / 3 +
    (arraycontributions5[[a]] + arraycontributions14[[a]] / Sqrt[3])^2 +
    Abs[(arraycontributions3[[a]] - arraycontributions15[[a]]) / Sqrt[3] *
      (arraycontributions4[[a]] - arraycontributions16[[a]]) / Sqrt[3] +
    Abs[(arraycontributions3[[a]] - arraycontributions15[[a]]) / Sqrt[3] *
      (arraycontributions5[[a]] + arraycontributions14[[a]] / Sqrt[3])] +
    Abs[(arraycontributions4[[a]] - arraycontributions16[[a]]) / Sqrt[3] *
      (arraycontributions5[[a]] + arraycontributions14[[a]] / Sqrt[3])]],
  {a, 1, arrays}];
```

(\* Create Parameter Graph of Yeast Arrays Projected Onto 2 D Subspace \*)

```
points1 = {Point[coordinates[[1]], Point[coordinates[[2]]],
  Point[coordinates[[10]], Point[coordinates[[11]]]};
points2 = {Point[coordinates[[3]], Point[coordinates[[4]]],
  Point[coordinates[[12]], Point[coordinates[[13]]]};
points3 = {Point[coordinates[[5]], Point[coordinates[[6]]],
  Point[coordinates[[14]], Point[coordinates[[15]]]};
points4 = {Point[coordinates[[7]], Point[coordinates[[16]]]};
points5 = {Point[coordinates[[8]], Point[coordinates[[9]]],
  Point[coordinates[[17]], Point[coordinates[[18]]]};
textcoordinates = coordinates;
Do[
  textcoordinates[[a, 1]] = If[
    textcoordinates[[a, 1]] > 0,
    textcoordinates[[a, 1]] - 0.085,
    textcoordinates[[a, 1]] + 0.095],
  {a, 1, 9}];
Do[
  textcoordinates[[a, 1]] =
  If[textcoordinates[[a, 1]] > 0,
    textcoordinates[[a, 1]] - 0.11,
    textcoordinates[[a, 1]] + 0.12],
  {a, 10, arrays}];
textcoordinates[[1]] = textcoordinates[[1]] + {0.04, -0.095};
textcoordinates[[3]] = textcoordinates[[3]] + {0.18, 0};
textcoordinates[[7]] = textcoordinates[[7]] + {0.18, 0};
textcoordinates[[8]] = textcoordinates[[8]] + {0.18, 0};
textcoordinates[[11]] = textcoordinates[[11]] + {0.12, -0.11};
textcoordinates[[12]] = textcoordinates[[12]] - {0.23, 0.06};
textcoordinates[[13]] = textcoordinates[[13]] + {0.23, 0};
textcoordinates[[15]] = textcoordinates[[15]] - {0.23, 0};
textcoordinates[[16]] = textcoordinates[[16]] - {0.02, 0.095};
textcoordinates[[17]] = textcoordinates[[17]] - {0.23, 0};
textcoordinates[[18]] = textcoordinates[[18]] + {0.11, 0.11};
```

```

texts = Table[Text[a, textcoordinates[[a]], {a, 1, arrays}];
radius = Sqrt[coordinates[[2, 1]]^2 + coordinates[[2, 2]]^2];
p = Show[
  {Graphics[{RGBColor[1, 1, 0], PointSize[0.035], points1}],
  Graphics[{RGBColor[0, 0.5, 0], PointSize[0.035], points2}],
  Graphics[{RGBColor[0, 0, 1], PointSize[0.035], points3}],
  Graphics[{RGBColor[1, 0, 0], PointSize[0.035], points4}],
  Graphics[{RGBColor[1, 0.5, 0], PointSize[0.035], points5}],
  Graphics[{RGBColor[1, 0.5, 0], Text["G2/M", {1.075, -0.52}]}],
  Graphics[{RGBColor[0, 0, 0], Text["M/G1", {0.9, 0.75}]}],
  Graphics[{RGBColor[1, 0, 0], Text["S/G2", {0.775, -0.85}]}],
  Graphics[{RGBColor[0, 0, 1], Text["S", {-0.95, -0.6}]}],
  Graphics[{RGBColor[0, 0.5, 0], Text["G1", {-0.8, 0.8}]}],
  Graphics[{RGBColor[0, 0, 0], Text["(a)", {-0.9, 0.95}]}],
  Graphics[{RGBColor[0, 0, 0], Text[" $\phi = \pi/3$ ", {0.825, 0.95}]}],
  Graphics[{RGBColor[0, 0, 0], Text[" $\phi = 0$ ", {1.12, -0.12}]}],
  Graphics[{RGBColor[0, 0, 0], Text["|x>", {1.12, 0.12}]}],
  Graphics[{RGBColor[0, 0, 0], Text["|y>", {-0.12, textcoordinates[[11, 2]]}]}],
  Graphics[{RGBColor[0, 0, 0], Text[" $\phi = -\pi/3$ ", {0.825, -0.975}]}],
  Graphics[texts],
  Graphics[{RGBColor[0, 0, 0], Dashing[{0.03, 0.02}], Circle[{0, 0}, 0.5]}],
  Graphics[{RGBColor[0, 0, 0], Dashing[{0.03, 0.02}], Circle[{0, 0}, 1]}],
  Graphics[{RGBColor[0, 0, 0], Dashing[{0.03, 0.02}], Line[{0, 1.05}, {0, -1.05}]}],
  Graphics[{RGBColor[0, 0, 0], Arrow[{-1.05 / Tan[Pi / 3.], 1.05}, {1.05 / Tan[Pi / 3.], -1.05},
    HeadCenter -> 0.5, HeadLength -> 0.035, HeadWidth -> 0.75]}],
  Graphics[{RGBColor[0, 0, 0], Arrow[{-1.05, 0}, {1.25, 0},
    HeadCenter -> 0.5, HeadLength -> 0.035, HeadWidth -> 0.75]}],
  Graphics[{RGBColor[0, 0, 0], Arrow[{-1.05 / Tan[Pi / 3.], -1.05}, {1.05 / Tan[Pi / 3.], 1.05},
    HeadCenter -> 0.5, HeadLength -> 0.035, HeadWidth -> 0.75]}],
  Graphics[{RGBColor[0, 0, 0], Circle[{0, 0}, 0.6,
    {ArcTan[coordinates[[1, 2]] / coordinates[[1, 1]], 0}]}],
  Graphics[{RGBColor[0, 0, 0], Arrow[{0.6 * Cos[-0.05], 0.6 * Sin[-0.05]}, {0.6 * Cos[0], 0.6 * Sin[0]},
    HeadCenter -> 0.5, HeadLength -> 0.035, HeadWidth -> 0.75]}],
  Graphics[{RGBColor[0, 0, 0], Arrow[{0, 0}, coordinates[[1]],
    HeadCenter -> 0.5, HeadLength -> 0.035, HeadWidth -> 0.75]}],
  Graphics[{RGBColor[0, 0, 0], Text["r", {0.5, -0.35}]}],
  Graphics[{RGBColor[0, 0, 0], Text[" $\phi$ ", {0.65, -0.15}]}],
  AspectRatio -> 1,
  PlotRange -> {{-1.05, 1.25}, {-1.05, 1.05}},
  Frame -> True,
  FrameTicks -> False,
  FrameLabel -> {None, None, None, None},
  GridLines -> {None, {{0, RGBColor[0, 0, 0]}}},
  DisplayFunction -> Identity];
p = FullGraphics[p];
p[[1, 2]] = p[[1, 2]] /.
  Text[labely, {b_, c_}, {1., 0.}] ->
  Text[labely, {-1.18, 0}, {0, 0}, {0, 1}];
p1 = Show[p,
  AspectRatio -> 0.95,
  PlotRange -> All,
  DisplayFunction -> Identity];

```

```
(* Sort Yeast Genes *)
```

```
(* Center Arraylets and Calculate Contributions of Genelets to Genes *)
```

```
centerarraylets = Transpose[arraylets1];  
average = Table[1, {a, 1, genes}];  
average = N[average / Sqrt[Dot[average, average]]];  
centerarraylets = centerarraylets - N[Outer[Times, Dot[centerarraylets, average], average]];  
centerarraylets = Transpose[centerarraylets];  
genecontributions = Transpose[Dot[centerarraylets, d1]];
```

```
(* Project Genes from 6 D Genelets Subspace Onto 2 D Subspace *)
```

```
coordinates = Table[{  
  (-Sqrt[3] * (genecontributions[[3, a]] - genecontributions[[15, a]]) +  
    2 * Sqrt[3] * (genecontributions[[4, a]] - genecontributions[[16, a]]) +  
    (3 * genecontributions[[5, a]] + Sqrt[3] * genecontributions[[14, a]])) / 6 /  
  Sqrt[(genecontributions[[3, a]] - genecontributions[[15, a]])^2 / 3 +  
    (genecontributions[[4, a]] - genecontributions[[16, a]])^2 / 3 +  
    (genecontributions[[5, a]] + genecontributions[[14, a]] / Sqrt[3])^2 +  
    Abs[(genecontributions[[3, a]] - genecontributions[[15, a]]) / Sqrt[3] *  
      (genecontributions[[4, a]] - genecontributions[[16, a]]) / Sqrt[3] +  
    Abs[(genecontributions[[3, a]] - genecontributions[[15, a]]) / Sqrt[3] *  
      (genecontributions[[5, a]] + genecontributions[[14, a]] / Sqrt[3])] +  
    Abs[(genecontributions[[4, a]] - genecontributions[[16, a]]) / Sqrt[3] *  
      (genecontributions[[5, a]] + genecontributions[[14, a]] / Sqrt[3])]],  
  (3 * (genecontributions[[3, a]] - genecontributions[[15, a]]) +  
    Sqrt[3] * (3 * genecontributions[[5, a]] + Sqrt[3] * genecontributions[[14, a]])) / 6 /  
  Sqrt[(genecontributions[[3, a]] - genecontributions[[15, a]])^2 / 3 +  
    (genecontributions[[4, a]] - genecontributions[[16, a]])^2 / 3 +  
    (genecontributions[[5, a]] + genecontributions[[14, a]] / Sqrt[3])^2 +  
    Abs[(genecontributions[[3, a]] - genecontributions[[15, a]]) / Sqrt[3] *  
      (genecontributions[[4, a]] - genecontributions[[16, a]]) / Sqrt[3] +  
    Abs[(genecontributions[[3, a]] - genecontributions[[15, a]]) / Sqrt[3] *  
      (genecontributions[[5, a]] + genecontributions[[14, a]] / Sqrt[3])] +  
    Abs[(genecontributions[[4, a]] - genecontributions[[16, a]]) / Sqrt[3] *  
      (genecontributions[[5, a]] + genecontributions[[14, a]] / Sqrt[3])]],  
  {a, 1, genes}];
```

```
(* Create Parameter Graph of 603 Cell Cycle Genes Projected Onto in 2 D Subspace *)
```

```
stream = StringJoin[name, ":Desktop Folder:PNAS Data:Spellman_Yeast_Classify.txt"];  
list = ReadList[stream, Word, RecordLists -> True, NullWords -> True];  
list = Drop[list, 1];  
stages = {"M/G1", "G1", "S", "S/G2", "G2/M"};  
points = {points1, points2, points3, points4, points5};  
radii = {radii1, radii2, radii3, radii4, radii5};  
Do[{  
  position = Position[list, stages[[b]]],  
  table = Table[list[[position[[a, 1]], 1]], {a, 1, Dimensions[position][[1]]},  
  position = Table[Position[genenames, table[[a]]], {a, 1, Dimensions[table][[1]]},  
  table = Flatten[Position[position, {}]],  
  Do[  
    position = Drop[position, {table[[a]], table[[a]]}],  
    {a, Dimensions[table][[1]], 1, -1}],  
  points[[b]] = Table[Point[coordinates[[position[[a, 1], 1]]], {a, 1, Dimensions[position][[1]]}],  
  radii[[b]] = Table[  
    Sqrt[coordinates[[position[[a, 1], 1]], 1]^2 + coordinates[[position[[a, 1], 1], 2]]^2],  
    {a, 1, Dimensions[position][[1]]},  
  {b, 1, Dimensions[stages][[1]]}]
```

```
Dimensions[points[[1]]][[1]]
Dimensions[points[[2]]][[1]]
Dimensions[points[[3]]][[1]]
Dimensions[points[[4]]][[1]]
Dimensions[points[[5]]][[1]]
```

76

233

56

92

147

```
radii = Sort[Flatten[radii], OrderedQ[{{#1}, {#2}}] &];
N[Round[radii[[57]] * 100] / 100]
N[Round[radii[[58]] * 100] / 100]
```

0.49

0.5

(\* 604 cell cycle genes, 76 in M/G1, 233 in G1, 56 in S, 92 in S/G2, 147 in G2/M. \*)

(\* For 547 genes, 50% or more of the contributions of the 6 genelets add up. \*)



```

kar4 = coordinates[Position[genenames, "YCL055W"][[1, 1]]];
cik1 = coordinates[Position[genenames, "YMR198W"][[1, 1]]];
p = Show[
  {Graphics[{RGBColor[0, 0, 0], Text[" $\phi=\pi/3$  ", {0.825, 0.95}]}],
  Graphics[{RGBColor[0, 0, 0], Text[" $\phi=0$ ", {1.12, -0.12}]}],
  Graphics[{RGBColor[0, 0, 0], Text[" |x>", {1.12, 0.12}]}],
  Graphics[{RGBColor[0, 0, 0], Text[" $\phi=-\pi/3$ ", {0.825, -0.975}]}],
  Graphics[{RGBColor[1, 1, 0], PointSize[0.02], Point[kar4]}],
  Graphics[{RGBColor[0, 0, 0], Arrow[{-0.9, 0.65}, kar4,
    HeadCenter -> 0.5, HeadLength -> 0.035, HeadWidth -> 0.75]}],
  Graphics[{RGBColor[0, 0, 0], Text["KAR4", {-0.9, 0.7}]}],
  Graphics[{RGBColor[1, 0, 0], PointSize[0.02], Point[cik1]}],
  Graphics[{RGBColor[0, 0, 0], Arrow[{-0.72, -0.93}, cik1,
    HeadCenter -> 0.5, HeadLength -> 0.035, HeadWidth -> 0.75]}],
  Graphics[{RGBColor[0, 0, 0], Text["CIK1", {-0.85, -0.93}]}],
  Graphics[{RGBColor[1, 0.5, 0], PointSize[0.02], points[[5]]}],
  Graphics[{RGBColor[1, 1, 0], PointSize[0.02], points[[1]]}],
  Graphics[{RGBColor[1, 0, 0], PointSize[0.02], points[[4]]}],
  Graphics[{RGBColor[0, 0.5, 0], PointSize[0.02], points[[2]]}],
  Graphics[{RGBColor[0, 0, 1], PointSize[0.02], points[[3]]}],
  Graphics[{RGBColor[1, 0.5, 0], Text["G2/M", {1.075, -0.52}]}],
  Graphics[{RGBColor[0, 0, 0], Text["M/G1", {0.9, 0.75}]}],
  Graphics[{RGBColor[1, 0, 0], Text["S/G2", {0.775, -0.85}]}],
  Graphics[{RGBColor[0, 0, 1], Text["S", {-0.95, -0.6}]}],
  Graphics[{RGBColor[0, 0.5, 0], Text["G1", {-0.8, 0.8}]}],
  Graphics[{RGBColor[0, 0, 0], Text["(b)", {-0.9, 0.95}]}],
  Graphics[{RGBColor[0, 0, 0], Dashing[{0.03, 0.02}], Circle[{0, 0}, 0.5]}],
  Graphics[{RGBColor[0, 0, 0], Dashing[{0.03, 0.02}], Circle[{0, 0}, 1]}],
  Graphics[{RGBColor[0, 0, 0], Dashing[{0.03, 0.02}], Line[{{0, 1.05}, {0, -1.05}}]}],
  Graphics[{RGBColor[0, 0, 0], Arrow[{-1.05 / Tan[Pi / 3.], 1.05}, {1.05 / Tan[Pi / 3.], -1.05},
    HeadCenter -> 0.5, HeadLength -> 0.035, HeadWidth -> 0.75]}],
  Graphics[{RGBColor[0, 0, 0], Arrow[{-1.05, 0}, {1.25, 0},
    HeadCenter -> 0.5, HeadLength -> 0.035, HeadWidth -> 0.75]}],
  Graphics[{RGBColor[0, 0, 0], Arrow[{-1.05 / Tan[Pi / 3.], -1.05}, {1.05 / Tan[Pi / 3.], 1.05},
    HeadCenter -> 0.5, HeadLength -> 0.035, HeadWidth -> 0.75]}],
  AspectRatio -> 1,
  PlotRange -> {{-1.05, 1.25}, {-1.05, 1.05}},
  Frame -> True,
  FrameTicks -> False,
  FrameLabel -> {None, None, None, None},
  GridLines -> {None, None},
  DisplayFunction -> Identity];
p = FullGraphics[p];
p[[1, 2]] = p[[1, 2]] /.
  Text[labely, {b_, c_}, {1., 0.}] ->
  Text[labely, {-1.18, 0}, {0, 0}, {0, 1}];
p2 = Show[p,
  AspectRatio -> 0.95,
  PlotRange -> All,
  DisplayFunction -> Identity];

```

(\* Create Parameter Graph of 77 Cell Cycle Genes Projected Onto 2D Subspace \*)

```
stream = StringJoin[name, ":Desktop Folder:PNAS Data:Traditional_Yeast_Classify.txt"];
list = ReadList[stream, Word, RecordLists -> True, NullWords -> True];
list = Drop[list, 1];
stages = {"M/G1", "G1", "S", "S/G2", "G2/M"};
points = {points1, points2, points3, points4, points5};
radii = {radii1, radii2, radii3, radii4, radii5};
Do[{
  position = Position[list, stages[[b]]],
  table = Table[list[[position[[a, 1]], 1]], {a, 1, Dimensions[position][[1]]},
  position = Table[Position[genenames, table[[a]]], {a, 1, Dimensions[table][[1]]},
  table = Flatten[Position[position, {}]],
  Do[
    position = Drop[position, {table[[a]], table[[a]]}],
    {a, Dimensions[table][[1]], 1, -1}],
  points[[b]] = Table[Point[coordinates[[position[[a, 1, 1]]]], {a, 1, Dimensions[position][[1]]},
  radii[[b]] = Table[
    Sqrt[coordinates[[position[[a, 1, 1]], 1]]^2 + coordinates[[position[[a, 1, 1]], 2]]^2,
    {a, 1, Dimensions[position][[1]]}],
  {b, 1, Dimensions[stages][[1]]}

Dimensions[points[[1]][[1]]
Dimensions[points[[2]][[1]]
Dimensions[points[[3]][[1]]
Dimensions[points[[4]][[1]]
Dimensions[points[[5]][[1]]

14

33

8

8

14

radii = Sort[Flatten[radii], OrderedQ[{{#1}, {#2}}] &];
N[Round[radii[[6]] * 100] / 100]
N[Round[radii[[7]] * 100] / 100]

0.32

0.54
```

(\* 77 cell cycle genes, 14 in M/G1, 33 in G1, 8 in S, 8 in S/G2, 14 in G2/M. \*)

(\* For 71 genes, 50% or more of the contributions of the 6 genelets add up. \*)

```

kar4 = coordinates[Position[genenames, "YCL055W"][[1, 1]]];
cik1 = coordinates[Position[genenames, "YMR198W"][[1, 1]]];
p = Show[
  {Graphics[{RGBColor[0, 0, 0], Text[" $\phi=\pi/3$  ", {0.825, 0.95}]}],
  Graphics[{RGBColor[0, 0, 0], Text[" $\phi=0$ ", {1.12, -0.12}]}],
  Graphics[{RGBColor[0, 0, 0], Text[" |x>", {1.12, 0.12}]}],
  Graphics[{RGBColor[0, 0, 0], Text[" $\phi=-\pi/3$ ", {0.825, -0.975}]}],
  Graphics[{RGBColor[0, 0.5, 0], PointSize[0.02], Point[kar4]}],
  Graphics[{RGBColor[0, 0, 0], Arrow[{-0.9, 0.65}, kar4,
    HeadCenter -> 0.5, HeadLength -> 0.035, HeadWidth -> 0.75]}],
  Graphics[{RGBColor[0, 0, 0], Text["KAR4", {-0.9, 0.7}]}],
  Graphics[{RGBColor[1, 0, 0], PointSize[0.02], Point[cik1]}],
  Graphics[{RGBColor[0, 0, 0], Arrow[{-0.72, -0.93}, cik1,
    HeadCenter -> 0.5, HeadLength -> 0.035, HeadWidth -> 0.75]}],
  Graphics[{RGBColor[0, 0, 0], Text["CIK1", {-0.85, -0.93}]}],
  Graphics[{RGBColor[1, 0.5, 0], PointSize[0.02], points[[5]]}],
  Graphics[{RGBColor[1, 1, 0], PointSize[0.02], points[[1]]}],
  Graphics[{RGBColor[1, 0, 0], PointSize[0.02], points[[4]]}],
  Graphics[{RGBColor[0, 0.5, 0], PointSize[0.02], points[[2]]}],
  Graphics[{RGBColor[0, 0, 1], PointSize[0.02], points[[3]]}],
  Graphics[{RGBColor[1, 0.5, 0], Text["G2/M", {1.075, -0.52}]}],
  Graphics[{RGBColor[0, 0, 0], Text["M/G1", {0.9, 0.75}]}],
  Graphics[{RGBColor[1, 0, 0], Text["S/G2", {0.775, -0.85}]}],
  Graphics[{RGBColor[0, 0, 1], Text["S", {-0.95, -0.6}]}],
  Graphics[{RGBColor[0, 0.5, 0], Text["G1", {-0.8, 0.8}]}],
  Graphics[{RGBColor[0, 0, 0], Text["(c)", {-0.9, 0.95}]}],
  Graphics[{RGBColor[0, 0, 0], Dashing[{0.03, 0.02}], Circle[{0, 0}, 0.5]}],
  Graphics[{RGBColor[0, 0, 0], Dashing[{0.03, 0.02}], Circle[{0, 0}, 1]}],
  Graphics[{RGBColor[0, 0, 0], Dashing[{0.03, 0.02}], Line[{{0, 1.05}, {0, -1.05}}]}],
  Graphics[{RGBColor[0, 0, 0], Arrow[{-1.05 / Tan[Pi / 3.], 1.05}, {1.05 / Tan[Pi / 3.], -1.05},
    HeadCenter -> 0.5, HeadLength -> 0.035, HeadWidth -> 0.75]}],
  Graphics[{RGBColor[0, 0, 0], Arrow[{-1.05, 0}, {1.25, 0},
    HeadCenter -> 0.5, HeadLength -> 0.035, HeadWidth -> 0.75]}],
  Graphics[{RGBColor[0, 0, 0], Arrow[{-1.05 / Tan[Pi / 3.], -1.05}, {1.05 / Tan[Pi / 3.], 1.05},
    HeadCenter -> 0.5, HeadLength -> 0.035, HeadWidth -> 0.75]}],
  AspectRatio -> 1,
  PlotRange -> {{-1.05, 1.25}, {-1.05, 1.05}},
  Frame -> True,
  FrameTicks -> False,
  FrameLabel -> {None, None, None, None},
  GridLines -> {None, None},
  DisplayFunction -> Identity];
p = FullGraphics[p];
p[[1, 2]] = p[[1, 2]] /.
  Text[labely, {b_, c_}, {1., 0.}] ->
  Text[labely, {-1.18, 0}, {0, 0}, {0, 1}];
p3 = Show[p,
  AspectRatio -> 0.95,
  PlotRange -> All,
  DisplayFunction -> Identity];

```

```
(* Sort Human Data *)
```

```
genes = genes2;  
arraynames = arraynames2;  
genenames = TakeColumns[genenames2, 1];
```

```
(* Sort Human Arrays *)
```

```
(* Center Genelets and Calculate Contributions of Arraylets to Arrays *)
```

```
arraycontributions3 = (genelets[[3]] - Sqrt[2/3/17.]) * d2[[3, 3]];  
arraycontributions4 = (genelets[[4]] + Sqrt[2/3/17.]) * d2[[4, 4]];  
arraycontributions5 = genelets[[5]] * d2[[5, 5]];  
arraycontributions14 = (genelets[[14]] + Sqrt[2/3/17.]) * d2[[14, 14]];  
arraycontributions15 = (genelets[[15]] - Sqrt[2/3/17.]) * d2[[15, 15]];  
arraycontributions16 = (genelets[[16]] + Sqrt[2/3/17.]) * d2[[16, 16]];
```

```
(* Project Arrays from 6 D Arraylets Subspace Onto 2 D Subspace *)
```

```
coordinates = Table[{  
  (-Sqrt[3] * (arraycontributions3[[a]] - arraycontributions15[[a]]) +  
    2 * Sqrt[3] * (arraycontributions4[[a]] - arraycontributions16[[a]]) +  
    (3 * arraycontributions5[[a]] + Sqrt[3] * arraycontributions14[[a]])) / 6 /  
  Sqrt[(arraycontributions3[[a]] - arraycontributions15[[a]])^2/3 +  
    (arraycontributions4[[a]] - arraycontributions16[[a]])^2/3 +  
    (arraycontributions5[[a]] + arraycontributions14[[a]] / Sqrt[3])^2 +  
    Abs[(arraycontributions3[[a]] - arraycontributions15[[a]]) / Sqrt[3] *  
      (arraycontributions4[[a]] - arraycontributions16[[a]]) / Sqrt[3] +  
    Abs[(arraycontributions3[[a]] - arraycontributions15[[a]]) / Sqrt[3] *  
      (arraycontributions5[[a]] + arraycontributions14[[a]] / Sqrt[3])] +  
    Abs[(arraycontributions4[[a]] - arraycontributions16[[a]]) / Sqrt[3] *  
      (arraycontributions5[[a]] + arraycontributions14[[a]] / Sqrt[3])]],  
  (3 * (arraycontributions3[[a]] - arraycontributions15[[a]]) +  
    Sqrt[3] * (3 * arraycontributions5[[a]] + Sqrt[3] * arraycontributions14[[a]])) / 6 /  
  Sqrt[(arraycontributions3[[a]] - arraycontributions15[[a]])^2/3 +  
    (arraycontributions4[[a]] - arraycontributions16[[a]])^2/3 +  
    (arraycontributions5[[a]] + arraycontributions14[[a]] / Sqrt[3])^2 +  
    Abs[(arraycontributions3[[a]] - arraycontributions15[[a]]) / Sqrt[3] *  
      (arraycontributions4[[a]] - arraycontributions16[[a]]) / Sqrt[3] +  
    Abs[(arraycontributions3[[a]] - arraycontributions15[[a]]) / Sqrt[3] *  
      (arraycontributions5[[a]] + arraycontributions14[[a]] / Sqrt[3])] +  
    Abs[(arraycontributions4[[a]] - arraycontributions16[[a]]) / Sqrt[3] *  
      (arraycontributions5[[a]] + arraycontributions14[[a]] / Sqrt[3])]],  
  {a, 1, arrays}];
```

(\* Create Parameter Graph of Human Arrays Projected Onto 2D Subspace \*)

```
points1 = {Point[coordinates[[5]], Point[coordinates[[6]],
  Point[coordinates[[12]], Point[coordinates[[13]]]};
points2 = {Point[coordinates[[7]], Point[coordinates[[14]]]};
points3 = {Point[coordinates[[1]], Point[coordinates[[2]], Point[coordinates[[8]],
  Point[coordinates[[9]], Point[coordinates[[15]], Point[coordinates[[16]]]};
points4 = {Point[coordinates[[3]], Point[coordinates[[10]], Point[coordinates[[17]]]};
points5 = {Point[coordinates[[4]], Point[coordinates[[11]], Point[coordinates[[18]]]};
textcoordinates = coordinates;
Do[
  textcoordinates[[a, 1]] = If[
    textcoordinates[[a, 1]] > 0,
    textcoordinates[[a, 1]] - 0.085,
    textcoordinates[[a, 1]] + 0.095],
  {a, 1, 9}];
Do[textcoordinates[[a, 1]] =
  If[
    textcoordinates[[a, 1]] > 0,
    textcoordinates[[a, 1]] - 0.11,
    textcoordinates[[a, 1]] + 0.12],
  {a, 10, arrays}];
textcoordinates[[1]] = textcoordinates[[1]] + {0.18, 0};
textcoordinates[[3]] = textcoordinates[[3]] + {0.18, -0.075};
textcoordinates[[5]] = textcoordinates[[5]] + {0, 0.08};
textcoordinates[[6]] = textcoordinates[[6]] + {0, 0.08};
textcoordinates[[7]] = textcoordinates[[7]] + {0.18, 0};
textcoordinates[[8]] = textcoordinates[[8]] + {0.18, 0};
textcoordinates[[11]] = textcoordinates[[11]] - {0.23, 0};
textcoordinates[[12]] = textcoordinates[[12]] - {0.23, 0};
textcoordinates[[15]] = textcoordinates[[15]] + {0.23, 0};
textcoordinates[[17]] = textcoordinates[[17]] - {0, 0.08};
```

```

texts = Table[Text[a, textcoordinates[[a]], {a, 1, arrays}];
zerophase = N[ArcTan[coordinates[[1, 2]] / (coordinates[[1, 1]])];
radius = Sqrt[coordinates[[2, 1]]^2 + coordinates[[2, 2]]^2];
p = Show[
  {Graphics[{RGBColor[1, 1, 0], PointSize[0.035], points1}],
    Graphics[{RGBColor[0, 0.5, 0], PointSize[0.035], points2}],
    Graphics[{RGBColor[0, 0, 1], PointSize[0.035], points3}],
    Graphics[{RGBColor[1, 0, 0], PointSize[0.035], points4}],
    Graphics[{RGBColor[1, 0.5, 0], PointSize[0.035], points5}],
    Graphics[{RGBColor[1, 0.5, 0], Text["G2/M", {-0.875, 0.75}]}],
    Graphics[{RGBColor[0, 0, 0], Text["M/G1", {-0.875, -0.75}]}],
    Graphics[{RGBColor[1, 0, 0], Text["G2", {-0.45, 0.975}]}],
    Graphics[{RGBColor[0, 0, 1], Text["S", {0.95, 0.6}]}],
    Graphics[{RGBColor[0, 0.5, 0], Text["G1/S", {0.825, -0.8}]}],
    Graphics[{RGBColor[0, 0, 0], Text["(d)", {-0.9, 0.95}]}],
    Graphics[{RGBColor[0, 0, 0], Text[" $\phi = \pi/3$ ", {0.825, 0.95}]}],
    Graphics[{RGBColor[0, 0, 0], Text[" $\phi = 0$ ", {1.12, 0.12}]}],
    Graphics[{RGBColor[0, 0, 0], Text["|x", {1.12, -0.12}]}],
    Graphics[{RGBColor[0, 0, 0], Text[" $\phi = -\pi/3$ ", {0.825, -0.975}]}],
    Graphics[{RGBColor[0, 0, 0], Text["|y", {-0.12, textcoordinates[[18, 2]]}]}],
    Graphics[texts],
    Graphics[{RGBColor[0, 0, 0], Dashing[{0.03, 0.02}], Circle[{0, 0}, 0.5]}],
    Graphics[{RGBColor[0, 0, 0], Dashing[{0.03, 0.02}], Circle[{0, 0}, 1]}],
    Graphics[{RGBColor[0, 0, 0], Dashing[{0.03, 0.02}], Line[{{0, 1.05}, {0, -1.05}}]}],
    Graphics[{RGBColor[0, 0, 0], Arrow[{-1.05 / Tan[Pi / 3.], 1.05}, {1.05 / Tan[Pi / 3.], -1.05},
      HeadCenter -> 0.5, HeadLength -> 0.035, HeadWidth -> 0.75]}],
    Graphics[{RGBColor[0, 0, 0], Arrow[{-1.05, 0}, {1.25, 0},
      HeadCenter -> 0.5, HeadLength -> 0.035, HeadWidth -> 0.75]}],
    Graphics[{RGBColor[0, 0, 0], Arrow[{-1.05 / Tan[Pi / 3.], -1.05}, {1.05 / Tan[Pi / 3.], 1.05},
      HeadCenter -> 0.5, HeadLength -> 0.035, HeadWidth -> 0.75]}],
    Graphics[{RGBColor[0, 0, 0], Circle[{0, 0}, 0.6,
      {ArcTan[coordinates[[1, 2]] / coordinates[[1, 1]], 0}]}],
    Graphics[{RGBColor[0, 0, 0], Arrow[{0.6 * Cos[-0.05], 0.6 * Sin[-0.05]}, {0.6 * Cos[0], 0.6 * Sin[0]},
      HeadCenter -> 0.5, HeadLength -> 0.035, HeadWidth -> 0.75]}],
    Graphics[{RGBColor[0, 0, 0], Arrow[{0, 0}, coordinates[[1]],
      HeadCenter -> 0.5, HeadLength -> 0.035, HeadWidth -> 0.75]}],
    Graphics[{RGBColor[0, 0, 0], Text[" $\phi$ ", {0.63, -0.25}]}],
    Graphics[{RGBColor[0, 0, 0], Text["r", {0.275, -0.15}]}],
    AspectRatio -> 1,
    PlotRange -> {{-1.05, 1.25}, {-1.05, 1.05}},
    Frame -> True,
    FrameTicks -> False,
    FrameLabel -> {None, None, None, None},
    GridLines -> {None, {{0, RGBColor[0, 0, 0]}}},
    DisplayFunction -> Identity];
p = FullGraphics[p];
p[[1, 2]] = p[[1, 2]] /.
  Text[labely, {b_, c_}, {1., 0.}] ->
  Text[labely, {-1.18, 0}, {0, 0}, {0, 1}];
p4 = Show[p,
  AspectRatio -> 0.95,
  PlotRange -> All,
  DisplayFunction -> Identity];

```

```
(* Sort Human Genes *)
```

```
(* Center Arraylets and Calculate Contributions of Genelets to Genes *)
```

```
centerarraylets = Transpose[arraylets2];  
average = Table[1, {a, 1, genes}];  
average = N[average / Sqrt[Dot[average, average]]];  
centerarraylets = centerarraylets - N[Outer[Times, Dot[centerarraylets, average], average]];  
centerarraylets = Transpose[centerarraylets];  
genecontributions = Transpose[Dot[centerarraylets, d2]];
```

```
(* Project Genes from 6 D Genelets Subspace Onto 2 D Subspace *)
```

```
coordinates = Table[{  
  (-Sqrt[3] * (genecontributions[[3, a]] - genecontributions[[15, a]]) +  
    2 * Sqrt[3] * (genecontributions[[4, a]] - genecontributions[[16, a]]) +  
    (3 * genecontributions[[5, a]] + Sqrt[3] * genecontributions[[14, a]])) / 6 /  
  Sqrt[(genecontributions[[3, a]] - genecontributions[[15, a]])^2 / 3 +  
    (genecontributions[[4, a]] - genecontributions[[16, a]])^2 / 3 +  
    (genecontributions[[5, a]] + genecontributions[[14, a]] / Sqrt[3])^2 +  
    Abs[(genecontributions[[3, a]] - genecontributions[[15, a]]) / Sqrt[3] *  
      (genecontributions[[4, a]] - genecontributions[[16, a]]) / Sqrt[3] +  
    Abs[(genecontributions[[3, a]] - genecontributions[[15, a]]) / Sqrt[3] *  
      (genecontributions[[5, a]] + genecontributions[[14, a]] / Sqrt[3])] +  
    Abs[(genecontributions[[4, a]] - genecontributions[[16, a]]) / Sqrt[3] *  
      (genecontributions[[5, a]] + genecontributions[[14, a]] / Sqrt[3])]],  
  (3 * (genecontributions[[3, a]] - genecontributions[[15, a]]) +  
    Sqrt[3] * (3 * genecontributions[[5, a]] + Sqrt[3] * genecontributions[[14, a]])) / 6 /  
  Sqrt[(genecontributions[[3, a]] - genecontributions[[15, a]])^2 / 3 +  
    (genecontributions[[4, a]] - genecontributions[[16, a]])^2 / 3 +  
    (genecontributions[[5, a]] + genecontributions[[14, a]] / Sqrt[3])^2 +  
    Abs[(genecontributions[[3, a]] - genecontributions[[15, a]]) / Sqrt[3] *  
      (genecontributions[[4, a]] - genecontributions[[16, a]]) / Sqrt[3] +  
    Abs[(genecontributions[[3, a]] - genecontributions[[15, a]]) / Sqrt[3] *  
      (genecontributions[[5, a]] + genecontributions[[14, a]] / Sqrt[3])] +  
    Abs[(genecontributions[[4, a]] - genecontributions[[16, a]]) / Sqrt[3] *  
      (genecontributions[[5, a]] + genecontributions[[14, a]] / Sqrt[3])]],  
  {a, 1, genes}];
```

```
(* Create Parameter Graph of 750 Cell Cycle Genes Projected Onto 2 D Subspace *)
```

```
stream = StringJoin[name, ":Desktop Folder:PNAS Data:Whitfield_Human_Classify.txt"];  
list = ReadList[stream, Word, RecordLists -> True, NullWords -> True];  
list = Drop[list, 1];  
stages = {"M/G1", "G1/S", "S", "G2", "G2/M"};  
points = {points1, points2, points3, points4, points5};  
radii = {radii1, radii2, radii3, radii4, radii5};  
Do[{  
  position = Position[list, stages[[b]]],  
  table = Table[list[[position[[a, 1]], 1]], {a, 1, Dimensions[position][[1]]},  
  position = Table[Position[genenames, table[[a]]], {a, 1, Dimensions[table][[1]]},  
  table = Flatten[Position[position, {}]],  
  Do[  
    position = Drop[position, {table[[a]], table[[a]]}],  
    {a, Dimensions[table][[1]], 1, -1}],  
  points[[b]] = Table[Point[coordinates[[position[[a, 1], 1]]], {a, 1, Dimensions[position][[1]]}],  
  radii[[b]] = Table[  
    Sqrt[coordinates[[position[[a, 1], 1]], 1]^2 + coordinates[[position[[a, 1], 1], 2]^2],  
    {a, 1, Dimensions[position][[1]]},  
  {b, 1, Dimensions[stages][[1]]}]
```

```
Dimensions[points[[1]]][[1]]
Dimensions[points[[2]]][[1]]
Dimensions[points[[3]]][[1]]
Dimensions[points[[4]]][[1]]
Dimensions[points[[5]]][[1]]
```

145

121

123

166

195

```
radii = Sort[Flatten[radii], OrderedQ[{{#1}, {#2}]] &];
```

```
N[Round[radii[[41]] * 100] / 100]
```

```
N[Round[radii[[42]] * 100] / 100]
```

0.49

0.5

(\* 750 cell cycle genes, 145 in M/G1, 121 in G1, 123 in S, 166 in S/G2, 195 in G2/M. \*)

(\* For 709 genes, 50% or more of the contributions of the 6 genelets add up. \*)



```

p = Show[
  {Graphics[{RGBColor[1, 0.5, 0], PointSize[0.02], points[[5]]}],
  Graphics[{RGBColor[1, 1, 0], PointSize[0.02], points[[1]]}],
  Graphics[{RGBColor[1, 0, 0], PointSize[0.02], points[[4]]}],
  Graphics[{RGBColor[0, 0.5, 0], PointSize[0.02], points[[2]]}],
  Graphics[{RGBColor[0, 0, 1], PointSize[0.02], points[[3]]}],
  Graphics[{RGBColor[1, 0.5, 0], Text["G2/M", {-0.875, 0.75}]}],
  Graphics[{RGBColor[0, 0, 0], Text["M/G1", {-0.875, -0.75}]}],
  Graphics[{RGBColor[1, 0, 0], Text["G2", {-0.45, 0.975}]}],
  Graphics[{RGBColor[0, 0, 1], Text["S", {0.95, 0.6}]}],
  Graphics[{RGBColor[0, 0.5, 0], Text["G1/S", {0.825, -0.8}]}],
  Graphics[{RGBColor[0, 0, 0], Text["(e)", {-0.9, 0.95}]}],
  Graphics[{RGBColor[0, 0, 0], Text[" $\phi = \pi/3$ ", {0.825, 0.95}]}],
  Graphics[{RGBColor[0, 0, 0], Text[" $\phi = 0$ ", {1.12, 0.12}]}],
  Graphics[{RGBColor[0, 0, 0], Text["|x", {1.12, -0.12}]}],
  Graphics[{RGBColor[0, 0, 0], Text[" $\phi = -\pi/3$ ", {0.825, -0.975}]}],
  Graphics[{RGBColor[0, 0, 0], Dashing[{0.03, 0.02}], Circle[{0, 0}, 0.5]}],
  Graphics[{RGBColor[0, 0, 0], Dashing[{0.03, 0.02}], Circle[{0, 0}, 1]}],
  Graphics[{RGBColor[0, 0, 0], Dashing[{0.03, 0.02}], Line[{{0, 1.05}, {0, -1.05}}]}],
  Graphics[{RGBColor[0, 0, 0], Arrow[{-1.05 / Tan[Pi / 3.], 1.05}, {1.05 / Tan[Pi / 3.], -1.05},
    HeadCenter -> 0.5, HeadLength -> 0.035, HeadWidth -> 0.75]}],
  Graphics[{RGBColor[0, 0, 0], Arrow[{-1.05, 0}, {1.25, 0},
    HeadCenter -> 0.5, HeadLength -> 0.035, HeadWidth -> 0.75]}],
  Graphics[{RGBColor[0, 0, 0], Arrow[{-1.05 / Tan[Pi / 3.], -1.05}, {1.05 / Tan[Pi / 3.], 1.05},
    HeadCenter -> 0.5, HeadLength -> 0.035, HeadWidth -> 0.75]}],
  AspectRatio -> 1,
  PlotRange -> {{-1.05, 1.25}, {-1.05, 1.05}},
  Frame -> True,
  FrameTicks -> False,
  FrameLabel -> {None, None, None, None},
  GridLines -> {None, None},
  DisplayFunction -> Identity];
p = FullGraphics[p];
p[[1, 2]] = p[[1, 2]] /.
  Text[labely, {b_, c_}, {1., 0.}] ->
  Text[labely, {-1.18, 0}, {0, 0}, {0, 1}];
p5 = Show[p,
  AspectRatio -> 0.95,
  PlotRange -> All,
  DisplayFunction -> Identity];

```

(\* Create Parameter Graph of 73 Cell Cycle Genes Projected Onto 2D Subspace \*)

```
stream = StringJoin[name, ":Desktop Folder:PNAS Data:Traditional_Human_Classify.txt"];
list = ReadList[stream, Word, RecordLists -> True, NullWords -> True];
list = Drop[list, 1];
stages = {"M/G1", "G1/S", "S", "G2", "G2/M"};
points = {points1, points2, points3, points4, points5};
radii = {radii1, radii2, radii3, radii4, radii5};
Do[{
  position = Position[list, stages[[b]]],
  table = Table[list[[position[[a, 1]], 1]], {a, 1, Dimensions[position][[1]]},
  position = Table[Position[genenames, table[[a]]], {a, 1, Dimensions[table][[1]]},
  table = Flatten[Position[position, {}]],
  Do[
    position = Drop[position, {table[[a]], table[[a]]}],
    {a, Dimensions[table][[1]], 1, -1}],
  points[[b]] = Table[Point[coordinates[[position[[a, 1, 1]]]], {a, 1, Dimensions[position][[1]]}],
  radii[[b]] = Table[
    Sqrt[coordinates[[position[[a, 1, 1]], 1]]^2 + coordinates[[position[[a, 1, 1]], 2]]^2,
    {a, 1, Dimensions[position][[1]]}],
  {b, 1, Dimensions[stages][[1]]}
Dimensions[points[[1]][[1]]
Dimensions[points[[2]][[1]]
Dimensions[points[[3]][[1]]
Dimensions[points[[4]][[1]]
Dimensions[points[[5]][[1]]
```

2

16

36

6

13

```
radii = Sort[Flatten[radii], OrderedQ[{{#1}, {#2}}] &];
N[Round[radii[[2]] * 100 / 100]
N[Round[radii[[3]] * 100 / 100]
```

0.18

0.63

(\* 73 cell cycle genes, 2 in M/G1, 16 in G1, 36 in S, 6 in S/G2, 13 in G2/M. \*)

(\* For 71 genes, 50% or more of the contributions of the 6 genelets add up. \*)

```
h1f0 = coordinates[[Position[genenames, "IMAGE:343744"]][[1, 1]]];
h1f2 = coordinates[[Position[genenames, "IMAGE:66317"]][[1, 1]]];
h1fx = coordinates[[Position[genenames, "IMAGE:347560"]][[1, 1]]];
h2afo = coordinates[[Position[genenames, "IMAGE:488964"]][[1, 1]]];
h2afp = coordinates[[Position[genenames, "IMAGE:128802"]][[1, 1]]];
h2afy = coordinates[[Position[genenames, "IMAGE:2315147"]][[1, 1]]];
h2afz = coordinates[[Position[genenames, "IMAGE:2315147"]][[1, 1]]];
h2bfb = coordinates[[Position[genenames, "IMAGE:1500000"]][[1, 1]]];
h2bfb2 = coordinates[[Position[genenames, "IMAGE:243784"]][[1, 1]]];
h2bfc = coordinates[[Position[genenames, "IMAGE:2056049"]][[1, 1]]];
h2bfq = coordinates[[Position[genenames, "IMAGE:430235"]][[1, 1]]];
h2bfr = coordinates[[Position[genenames, "IMAGE:1675553"]][[1, 1]]];
h3f3a = coordinates[[Position[genenames, "IMAGE:884272"]][[1, 1]]];
h3f3a2 = coordinates[[Position[genenames, "IMAGE:1415750"]][[1, 1]]];
h3f3b = coordinates[[Position[genenames, "IMAGE:950574"]][[1, 1]]];
h3f3b2 = coordinates[[Position[genenames, "IMAGE:2114004"]][[1, 1]]];
```

```

p = Show[
  {Graphics[{RGBColor[1, 0.5, 0], PointSize[0.02], points[[5]]}],
  Graphics[{RGBColor[1, 1, 0], PointSize[0.02], points[[1]]}],
  Graphics[{RGBColor[1, 0, 0], PointSize[0.02], points[[4]]}],
  Graphics[{RGBColor[0, 0.5, 0], PointSize[0.02], points[[2]]}],
  Graphics[{RGBColor[0, 0, 1], PointSize[0.02], points[[3]]}],
  Graphics[{RGBColor[1, 0.5, 0], Text["G2/M", {-0.875, 0.75}]}],
  Graphics[{RGBColor[0, 0, 0], Text["M/G1", {-0.875, -0.75}]}],
  Graphics[{RGBColor[1, 0, 0], Text["G2", {-0.45, 0.975}]}],
  Graphics[{RGBColor[0, 0, 1], Text["S", {0.95, 0.6}]}],
  Graphics[{RGBColor[0, 0.5, 0], Text["G1/S", {0.825, -0.8}]}],
  Graphics[{RGBColor[0, 0, 0], Text["(f)", {-0.9, 0.95}]}],
  Graphics[{RGBColor[0, 0, 0], Text[" $\phi = \pi/3$ ", {0.825, 0.95}]}],
  Graphics[{RGBColor[0, 0, 0], Text[" $\phi = 0$ ", {1.12, 0.12}]}],
  Graphics[{RGBColor[0, 0, 0], Text["|x", {1.12, -0.12}]}],
  Graphics[{RGBColor[0, 0, 0], Text[" $\phi = -\pi/3$ ", {0.825, -0.975}]}],
  Graphics[{RGBColor[0, 0, 0], Dashing[{0.03, 0.02}], Circle[{0, 0}, 0.5]}],
  Graphics[{RGBColor[0, 0, 0], Dashing[{0.03, 0.02}], Circle[{0, 0}, 1]}],
  Graphics[{RGBColor[0, 0, 0], Dashing[{0.03, 0.02}], Line[{{0, 1.05}, {0, -1.05}}]}],
  Graphics[{RGBColor[0, 0, 0], Arrow[h1f0 - {0.045, 0.045}, h1f0 - {0.01, 0.01},
    HeadCenter -> 0.5, HeadLength -> 0.035, HeadWidth -> 0.75]}],
  Graphics[{RGBColor[0, 0, 0], Arrow[h1f2 - {0.045, 0.045}, h1f2 - {0.01, 0.01},
    HeadCenter -> 0.5, HeadLength -> 0.035, HeadWidth -> 0.75]}],
  Graphics[{RGBColor[0, 0, 0], Arrow[h1fx - {0.045, 0.045}, h1fx - {0.01, 0.01},
    HeadCenter -> 0.5, HeadLength -> 0.035, HeadWidth -> 0.75]}],
  Graphics[{RGBColor[0, 0, 0], Arrow[h2afo - {0.045, 0.045}, h2afo - {0.01, 0.01},
    HeadCenter -> 0.5, HeadLength -> 0.035, HeadWidth -> 0.75]}],
  Graphics[{RGBColor[0, 0, 0], Arrow[h2afp - {0.045, 0.045}, h2afp - {0.01, 0.01},
    HeadCenter -> 0.5, HeadLength -> 0.035, HeadWidth -> 0.75]}],
  Graphics[{RGBColor[0, 0, 0], Arrow[h2afy + {0.045, 0.045}, h2afy + {0.01, 0.01},
    HeadCenter -> 0.5, HeadLength -> 0.035, HeadWidth -> 0.75]}],
  Graphics[{RGBColor[0, 0, 0], Arrow[h2afz - {0.045, 0.045}, h2afz - {0.01, 0.01},
    HeadCenter -> 0.5, HeadLength -> 0.035, HeadWidth -> 0.75]}],
  Graphics[{RGBColor[0, 0, 0], Arrow[h2bfb - {0.045, 0.045}, h2bfb - {0.01, 0.01},
    HeadCenter -> 0.5, HeadLength -> 0.035, HeadWidth -> 0.75]}],
  Graphics[{RGBColor[0, 0, 0], Arrow[h2bfb2 - {0.045, 0.045}, h2bfb2 - {0.01, 0.01},
    HeadCenter -> 0.5, HeadLength -> 0.035, HeadWidth -> 0.75]}],
  Graphics[{RGBColor[0, 0, 0], Arrow[h2bfc - {0.045, 0.045}, h2bfc - {0.01, 0.01},
    HeadCenter -> 0.5, HeadLength -> 0.035, HeadWidth -> 0.75]}],
  Graphics[{RGBColor[0, 0, 0], Arrow[h2bfq + {0.045, 0.045}, h2bfq + {0.01, 0.01},
    HeadCenter -> 0.5, HeadLength -> 0.035, HeadWidth -> 0.75]}],
  Graphics[{RGBColor[0, 0, 0], Arrow[h2bfr + {0.045, 0.045}, h2bfr + {0.01, 0.01},
    HeadCenter -> 0.5, HeadLength -> 0.035, HeadWidth -> 0.75]}],
  Graphics[{RGBColor[0, 0, 0], Arrow[h3f3a - {0.045, 0.045}, h3f3a - {0.01, 0.01},
    HeadCenter -> 0.5, HeadLength -> 0.035, HeadWidth -> 0.75]}],
  Graphics[{RGBColor[0, 0, 0], Arrow[h3f3a2 + {0.045, 0.045}, h3f3a2 + {0.01, 0.01},
    HeadCenter -> 0.5, HeadLength -> 0.035, HeadWidth -> 0.75]}],
  Graphics[{RGBColor[0, 0, 0], Arrow[h3f3b - {0.045, 0.045}, h3f3b - {0.01, 0.01},
    HeadCenter -> 0.5, HeadLength -> 0.035, HeadWidth -> 0.75]}],
  Graphics[{RGBColor[0, 0, 0], Arrow[h3f3b2 - {0.045, 0.045}, h3f3b2 - {0.01, 0.01},
    HeadCenter -> 0.5, HeadLength -> 0.035, HeadWidth -> 0.75]}],
  Graphics[{RGBColor[0, 0, 0], Arrow[{-1.05 / Tan[Pi / 3.], 1.05}, {1.05 / Tan[Pi / 3.], -1.05},
    HeadCenter -> 0.5, HeadLength -> 0.035, HeadWidth -> 0.75]}],
  Graphics[{RGBColor[0, 0, 0], Arrow[{-1.05, 0}, {1.25, 0},
    HeadCenter -> 0.5, HeadLength -> 0.035, HeadWidth -> 0.75]}],
  Graphics[{RGBColor[0, 0, 0], Arrow[{-1.05 / Tan[Pi / 3.], -1.05}, {1.05 / Tan[Pi / 3.], 1.05},
    HeadCenter -> 0.5, HeadLength -> 0.035, HeadWidth -> 0.75]}],
  AspectRatio -> 1,
  PlotRange -> {{-1.05, 1.25}, {-1.05, 1.05}},
  Frame -> True,
  FrameTicks -> False,
  FrameLabel -> {None, None, None, None},
  GridLines -> {None, None},
  DisplayFunction -> Identity];

```

```

p = FullGraphics[p];
p[[1, 2]] = p[[1, 2]] /.
  Text[labely, {b_, c_}, {1., 0.}] ->
  Text[labely, {-1.18, 0}, {0, 0}, {0, 1}];
p6 = Show[p,
  AspectRatio -> 0.95,
  PlotRange -> All,
  DisplayFunction -> Identity];

```

(\* Display Both Arrays & Genes Parameter Graphs \*)

```

Show[GraphicsArray[{{p1, p2, p3}, {p4, p5, p6}}],
  GraphicsSpacing -> 0];

```

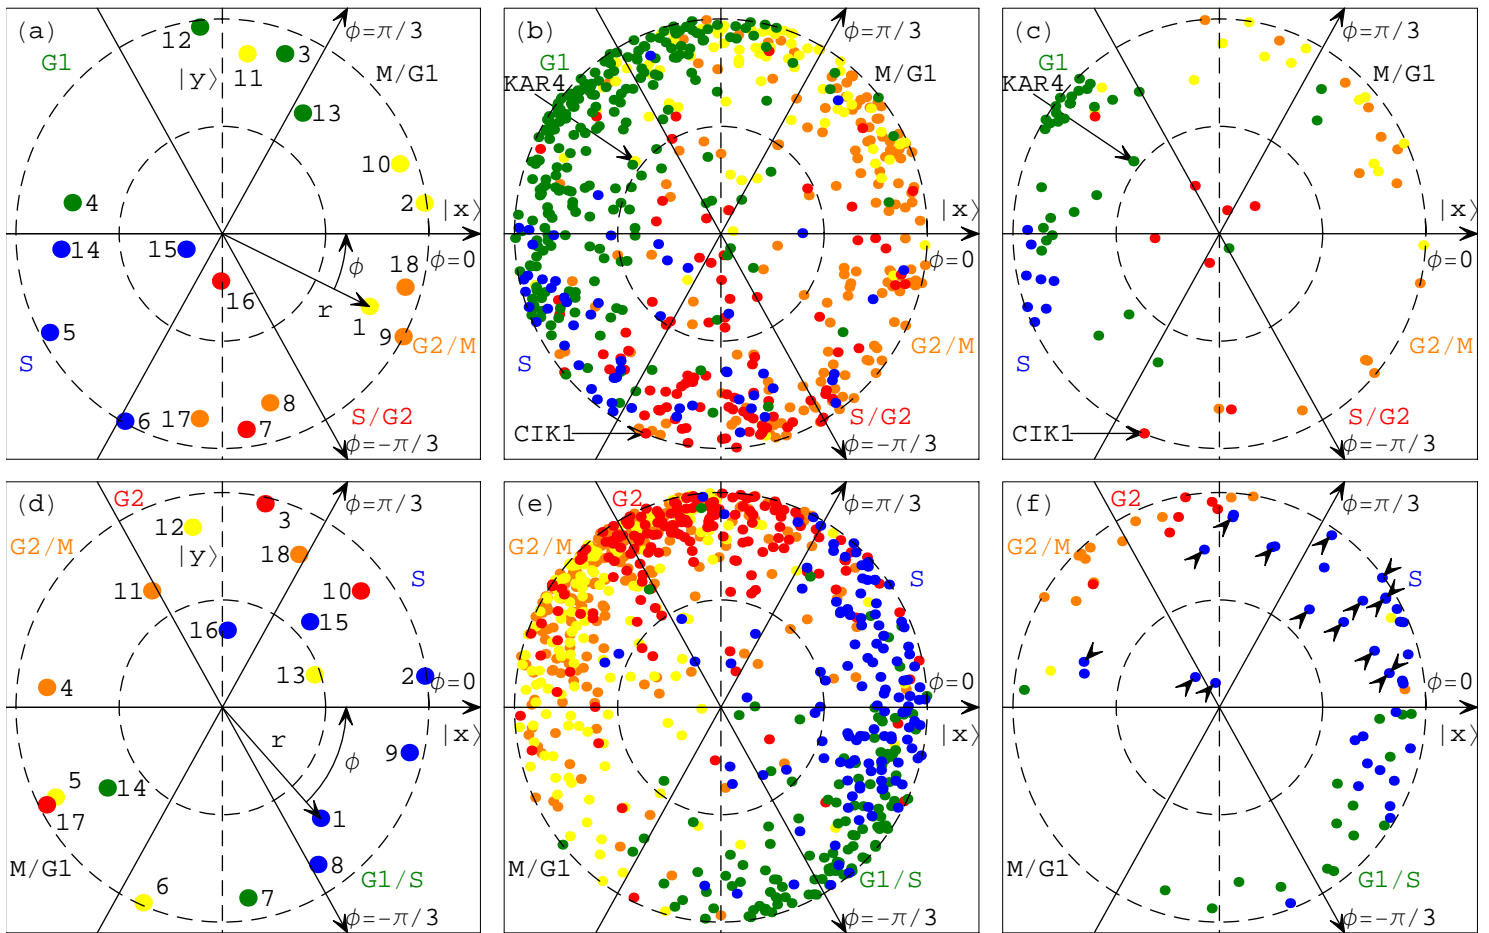

```
(* Reconstruct Yeast and Human Data in Common Cell Cycle Subspace *)
```

```
(* Sort Yeast Genes *)
```

```
matrix = matrix1;  
genes = genes1;  
arraynames = arraynames1;  
genenames = genenames1;
```

```
(* Center Arraylets and Calculate Contributions of Genelets to Genes *)
```

```
centerarraylets = Transpose[arraylets1];  
average = Table[1, {a, 1, genes}];  
average = N[average / Sqrt[Dot[average, average]]];  
centerarraylets = centerarraylets - N[Outer[Times, Dot[centerarraylets, average], average]];  
centerarraylets = Transpose[centerarraylets];  
genecontributions = Transpose[Dot[centerarraylets, d1]];
```

```
(* Project Genes from 6 D Genelets Subspace Onto 2 D Subspace *)
```

```
coordinates = Table[{  
  (-Sqrt[3] * (genecontributions[[3, a]] - genecontributions[[15, a]]) +  
    2 * Sqrt[3] * (genecontributions[[4, a]] - genecontributions[[16, a]]) +  
    (3 * genecontributions[[5, a]] + Sqrt[3] * genecontributions[[14, a]])) / 6 /  
  Sqrt[(genecontributions[[3, a]] - genecontributions[[15, a]])^2 / 3 +  
    (genecontributions[[4, a]] - genecontributions[[16, a]])^2 / 3 +  
    (genecontributions[[5, a]] + genecontributions[[14, a]] / Sqrt[3])^2 +  
  Abs[(genecontributions[[3, a]] - genecontributions[[15, a]]) / Sqrt[3] *  
    (genecontributions[[4, a]] - genecontributions[[16, a]])] / Sqrt[3] +  
  Abs[(genecontributions[[3, a]] - genecontributions[[15, a]]) / Sqrt[3] *  
    (genecontributions[[5, a]] + genecontributions[[14, a]] / Sqrt[3])] +  
  Abs[(genecontributions[[4, a]] - genecontributions[[16, a]]) / Sqrt[3] *  
    (genecontributions[[5, a]] + genecontributions[[14, a]] / Sqrt[3])],  
  (3 * (genecontributions[[3, a]] - genecontributions[[15, a]]) +  
    Sqrt[3] * (3 * genecontributions[[5, a]] + Sqrt[3] * genecontributions[[14, a]])) / 6 /  
  Sqrt[(genecontributions[[3, a]] - genecontributions[[15, a]])^2 / 3 +  
    (genecontributions[[4, a]] - genecontributions[[16, a]])^2 / 3 +  
    (genecontributions[[5, a]] + genecontributions[[14, a]] / Sqrt[3])^2 +  
  Abs[(genecontributions[[3, a]] - genecontributions[[15, a]]) / Sqrt[3] *  
    (genecontributions[[4, a]] - genecontributions[[16, a]])] / Sqrt[3] +  
  Abs[(genecontributions[[3, a]] - genecontributions[[15, a]]) / Sqrt[3] *  
    (genecontributions[[5, a]] + genecontributions[[14, a]] / Sqrt[3])] +  
  Abs[(genecontributions[[4, a]] - genecontributions[[16, a]]) / Sqrt[3] *  
    (genecontributions[[5, a]] + genecontributions[[14, a]] / Sqrt[3])],  
  {a, 1, genes}];
```

```
(* Define the Initial Phase *)
```

```
zerophase = Pi / 2;
```

(\* Sort Genes According to Phases in 2D Subspace \*)

```
coordinates = Table[{
  coordinates[[a, 1]] / Sqrt[coordinates[[a, 1]]^2 + coordinates[[a, 2]]^2],
  coordinates[[a, 2]] / Sqrt[coordinates[[a, 1]]^2 + coordinates[[a, 2]]^2]},
{a, 1, genes}];
coordinates = Table[{
  -coordinates[[a, 1]] * Cos[zerophase] - coordinates[[a, 2]] * Sin[zerophase],
  -coordinates[[a, 2]] * Cos[zerophase] + coordinates[[a, 1]] * Sin[zerophase]},
{a, 1, genes}];
coordinates = Table[{
  coordinates[[a, 1]],
  coordinates[[a, 2]],
  N[ArcTan[coordinates[[a, 1]] / coordinates[[a, 2]]] / Pi},
{a, 1, genes}];
sortmatrix = AppendRows[coordinates, genenames, matrix];
sortmatrix = Sort[sortmatrix, OrderedQ[{{#1}, {#2}}] &];
negative1 = 2112;
positive1 = 2113;
sortmatrix[[negative1, 1]]
sortmatrix[[positive1, 1]]

-0.0007522

0.000147134

sortmatrix = Transpose[Drop[Transpose[sortmatrix], {1}]];
sortmatrix = AppendColumns[
  Sort[
    TakeRows[sortmatrix, {1, negative1}],
    OrderedQ[{{#2}, {#1}}] &],
  Sort[
    TakeRows[sortmatrix, {positive1, genes}],
    OrderedQ[{{#1}, {#2}}] &];
phases = TakeColumns[sortmatrix, {2, 2}];
sortmatrix = Transpose[Drop[Transpose[sortmatrix], {1, 2}]];
```

```
(* Classify Gene Phases into Cell Cycle Phases *)
```

```
ph1 = 0;  
ph2 = -1 / 2.;  
ph3 = -1.;  
ph4 = -4 / 3.;  
ph5 = -5 / 3.;
```

```
endph5 = genes;  
beginph1 = 1;  
phases[[endph5]] - ph1  
phases[[beginph1]] - ph1
```

```
{0.0000468343}
```

```
{-0.000239433}
```

```
endph1 = 1107;  
beginph2 = 1108;  
phases[[endph1]] - ph2  
phases[[beginph2]] - ph2
```

```
{0.00152245}
```

```
{0.999794}
```

```
endph2 = 2112;  
beginph3 = 2113;  
phases[[endph2]] - ph3  
phases[[beginph3]] - ph3
```

```
{1.0003}
```

```
{0.999906}
```

```
endph3 = 2816;  
beginph4 = 2817;  
phases[[endph3]] - ph4  
phases[[beginph4]] - ph4
```

```
{1.0009}
```

```
{0.99987}
```

```
endph4 = 3827;  
beginph5 = 3828;  
phases[[endph4]] - ph5  
phases[[beginph5]] - ph5
```

```
{2.00019}
```

```
{1.99935}
```

```
(* 4523 yeast genes, 1107 in M/G1, 1005 in G1, 704 in S, 1011 in S/G2, 696 in G2/M. *)
```

```
(* Reconstruct Data With Sorted Genes *)
```

```
matrix1 = TakeColumns[sortmatrix, {7, arrays + 6}];  
genenames1 = TakeColumns[sortmatrix, {1, 6}];
```

```
(* Sort Human Genes *)
```

```
matrix = matrix2;  
genes = genes2;  
arraynames = arraynames2;  
genenames = genenames2;
```

```
(* Center Arraylets and Calculate Contributions of Genelets to Genes *)
```

```
centerarraylets = Transpose[arraylets2];  
average = Table[1, {a, 1, genes}];  
average = N[average / Sqrt[Dot[average, average]]];  
centerarraylets = centerarraylets - N[Outer[Times, Dot[centerarraylets, average], average]];  
centerarraylets = Transpose[centerarraylets];  
genecontributions = Transpose[Dot[centerarraylets, d2]];
```

```
(* Project Genes from 6 D Genelets Subspace Onto 2 D Subspace *)
```

```
coordinates = Table[{  
  (-Sqrt[3] * (genecontributions[[3, a]] - genecontributions[[15, a]]) +  
    2 * Sqrt[3] * (genecontributions[[4, a]] - genecontributions[[16, a]]) +  
    (3 * genecontributions[[5, a]] + Sqrt[3] * genecontributions[[14, a]])) / 6 /  
  Sqrt[(genecontributions[[3, a]] - genecontributions[[15, a]])^2 / 3 +  
    (genecontributions[[4, a]] - genecontributions[[16, a]])^2 / 3 +  
    (genecontributions[[5, a]] + genecontributions[[14, a]] / Sqrt[3])^2 +  
  Abs[(genecontributions[[3, a]] - genecontributions[[15, a]]) / Sqrt[3] *  
    (genecontributions[[4, a]] - genecontributions[[16, a]])] / Sqrt[3] +  
  Abs[(genecontributions[[3, a]] - genecontributions[[15, a]]) / Sqrt[3] *  
    (genecontributions[[5, a]] + genecontributions[[14, a]] / Sqrt[3])] +  
  Abs[(genecontributions[[4, a]] - genecontributions[[16, a]]) / Sqrt[3] *  
    (genecontributions[[5, a]] + genecontributions[[14, a]] / Sqrt[3])],  
  (3 * (genecontributions[[3, a]] - genecontributions[[15, a]]) +  
    Sqrt[3] * (3 * genecontributions[[5, a]] + Sqrt[3] * genecontributions[[14, a]])) / 6 /  
  Sqrt[(genecontributions[[3, a]] - genecontributions[[15, a]])^2 / 3 +  
    (genecontributions[[4, a]] - genecontributions[[16, a]])^2 / 3 +  
    (genecontributions[[5, a]] + genecontributions[[14, a]] / Sqrt[3])^2 +  
  Abs[(genecontributions[[3, a]] - genecontributions[[15, a]]) / Sqrt[3] *  
    (genecontributions[[4, a]] - genecontributions[[16, a]])] / Sqrt[3] +  
  Abs[(genecontributions[[3, a]] - genecontributions[[15, a]]) / Sqrt[3] *  
    (genecontributions[[5, a]] + genecontributions[[14, a]] / Sqrt[3])] +  
  Abs[(genecontributions[[4, a]] - genecontributions[[16, a]]) / Sqrt[3] *  
    (genecontributions[[5, a]] + genecontributions[[14, a]] / Sqrt[3])],  
  {a, 1, genes}];
```

```
(* Define the Initial Phase *)
```

```
zerophase = Pi / 2;
```



(\* Sort Genes According to Phases in 2D Subspace \*)

```
coordinates = Table[{
  coordinates[[a, 1]] / Sqrt[coordinates[[a, 1]]^2 + coordinates[[a, 2]]^2],
  coordinates[[a, 2]] / Sqrt[coordinates[[a, 1]]^2 + coordinates[[a, 2]]^2]},
{a, 1, genes}];
coordinates = Table[{
  -coordinates[[a, 1]] * Cos[zerophase] - coordinates[[a, 2]] * Sin[zerophase],
  -coordinates[[a, 2]] * Cos[zerophase] + coordinates[[a, 1]] * Sin[zerophase]},
{a, 1, genes}];
coordinates = Table[{
  coordinates[[a, 1]],
  coordinates[[a, 2]],
  N[ArcTan[coordinates[[a, 1]] / coordinates[[a, 2]]] / Pi},
{a, 1, genes}];
sortmatrix = AppendRows[coordinates, genenames, matrix];
sortmatrix = Sort[sortmatrix, OrderedQ[{{#1}, {#2}}] &];
negative1 = 5803;
positive1 = 5804;
sortmatrix[[negative1, 1]]
sortmatrix[[positive1, 1]]

-0.000356952

0.0000427899

sortmatrix = Transpose[Drop[Transpose[sortmatrix], {1}]];
sortmatrix = AppendColumns[
  Sort[
    TakeRows[sortmatrix, {1, negative1}],
    OrderedQ[{{#2}, {#1}}] &],
  Sort[
    TakeRows[sortmatrix, {positive1, genes}],
    OrderedQ[{{#1}, {#2}}] &];
phases = TakeColumns[sortmatrix, {2, 2}];
sortmatrix = Transpose[Drop[Transpose[sortmatrix], {1, 2}]];
```

```
(* Classify Gene Phases into Cell Cycle Phases *)
```

```
ph1 = -1 / 3;  
ph2 = -2 / 3.;  
ph3 = -1;  
ph4 = -4 / 3.;  
ph5 = 1 / 3.;
```

```
endph5 = 1817;  
beginph1 = 1818;  
phases[[endph5]] - ph1  
phases[[beginph1]] - ph1
```

```
{0.0000222109}
```

```
{-0.0000823037}
```

```
endph1 = 3941;  
beginph2 = 3942;  
phases[[endph1]] - ph2  
phases[[beginph2]] - ph2
```

```
{1.}
```

```
{0.999534}
```

```
endph2 = 5803;  
beginph3 = 5804;  
phases[[endph2]] - ph3  
phases[[beginph3]] - ph3
```

```
{1.00011}
```

```
{0.999986}
```

```
endph3 = 7574;  
beginph4 = 7575;  
phases[[endph3]] - ph4  
phases[[beginph4]] - ph4
```

```
{1.}
```

```
{0.999956}
```

```
endph4 = 9827;  
beginph5 = 9828;  
phases[[endph4]] - ph5  
phases[[beginph5]] - ph5
```

```
{0.000191402}
```

```
{-0.000147269}
```

```
(* 12056 human genes, 4046 in S, 2124 in S/G2, 1862 in G2/M, 1771 in M/G1, 2253 in G1. *)
```

```
(* Reconstruct Data With Sorted Genes *)
```

```
matrix2 = TakeColumns[sortmatrix, {6, arrays + 5}];  
genenames2 = TakeColumns[sortmatrix, {1, 5}];
```

```
(* Calculate GSVD of Sorted Yeast and Human Data *)
```

```
matrix = AppendColumns[matrix1, matrix2];
{q, r} = QRDecomposition[matrix];
q = Conjugate[Transpose[q]];
q1 = TakeRows[q, {1, genes1}];
{u1, w1, v1} = SingularValues[q1];
genelets = Dot[v1, r];
Do[genelets[[a]] = genelets[[a]] / Sqrt[Dot[genelets[[a]], genelets[[a]]],
  {a, 1, arrays}]

genelets[[2]] = -genelets[[2]];
genelets[[3]] = -genelets[[3]];
genelets[[5]] = -genelets[[5]];
genelets[[14]] = -genelets[[14]];
genelets[[16]] = -genelets[[16]];
genelets[[17]] = -genelets[[17]];

arraylets1 = Dot[matrix1, Inverse[genelets]];
arraylets2 = Dot[matrix2, Inverse[genelets]];
arraylets1 = Transpose[arraylets1];
Do[arraylets1[[a]] = arraylets1[[a]] / Sqrt[Dot[arraylets1[[a]], arraylets1[[a]]], {a, 1, arrays}];
arraylets1 = Transpose[arraylets1];
arraylets2 = Transpose[arraylets2];
Do[arraylets2[[a]] = arraylets2[[a]] / Sqrt[Dot[arraylets2[[a]], arraylets2[[a]]], {a, 1, arrays}];
arraylets2 = Transpose[arraylets2];
d1 = Chop[Dot[PseudoInverse[arraylets1], matrix1, Inverse[genelets]]];
d2 = Chop[Dot[PseudoInverse[arraylets2], matrix2, Inverse[genelets]]];
```

```
(* Display Sorted and Reconstructed Yeast Data *)
```

```
genes = genes1;  
genenames = genenames1;  
arraynames = arraynames1;  
{endph1, endph2, endph3, endph4, endph5} = {1107, 2113, 2818, 3827, 4523};
```

```
(* Reconstruct Sorted Yeast Data *)
```

```
Do[d1[[a, a]] = 0, {a, 1, 2}];  
Do[d1[[a, a]] = 0, {a, 6, 13}];  
Do[d1[[a, a]] = 0, {a, 17, 18}];  
matrix = Dot[arraylets1, d1, genelets];
```

```
(* Center Reconstructed Sorted Yeast Data *)
```

```
average = Table[1, {a, 1, arrays}];  
average = N[average / Sqrt[Dot[average, average]]];  
matrix = matrix - N[Outer[Times, Dot[matrix, average], average]];  
matrix = Transpose[matrix];  
average = Table[1, {a, 1, genes}];  
average = N[average / Sqrt[Dot[average, average]]];  
matrix = matrix - N[Outer[Times, Dot[matrix, average], average]];  
matrix = Transpose[matrix];
```

```
(* Create Reconstructed Sorted Yeast Data 2D Red & Green Raster Display *)
```

```
contrast = 10 * 1.5;  
displaying = Table[  
  If[contrast * matrix[[i, j]] > 0,  
    If[contrast * matrix[[i, j]] < 1, {contrast * matrix[[i, j]], 0}, {1, 0}],  
    If[contrast * matrix[[i, j]] > -1, {0, -contrast * matrix[[i, j]]}, {0, 1}]],  
  {i, 1, genes}, {j, 1, arrays}];  
framex = Table[{a - 0.5, arraynames[[2, a]]}, {a, 1, arrays}];  
framey = {  
  {genes - endph1 / 2, "M/G1"},  
  {genes - (endph1 + endph2) / 2, "G1"},  
  {genes - (endph2 + endph3) / 2, "S"},  
  {genes - (endph3 + endph4) / 2, "S/G2"},  
  {(genes - endph4) / 2, "G2/M"}];  
gridy = {  
  {genes - endph1 + 0.5, {RGBColor[0, 0, 0]}},  
  {genes - endph2 + 0.5, {RGBColor[0, 0, 0]}},  
  {genes - endph3 + 0.5, {RGBColor[0, 0, 0]}},  
  {genes - endph4 + 0.5, {RGBColor[0, 0, 0]}}];  
labelx = "(a) Arrays";  
labely = ColumnForm[{" ", "Genes", " ", " ", " ", " ", " ", " ", " "}, Center];  
g = Show[  
  Graphics[  
    RasterArray[  
      Table[  
        RGBColor[displaying[[i, j, 1]], displaying[[i, j, 2]], 0],  
        {i, genes, 1, -1}, {j, 1, arrays}]]],  
  AspectRatio -> 1,  
  Frame -> True,  
  FrameTicks -> {None, framey, framex, None},  
  FrameLabel -> {None, labely, labelx, None},  
  GridLines -> {None, gridy},  
  DisplayFunction -> Identity];
```

```

g = FullGraphics[g];
g[[1, 2]] = g[[1, 2]] /.
  Text[labely, {b_, c_}, {1., 0.}] →
  Text[labely, {b, c}, {0, 0}, {0, 1}];
g[[1, 2]] = g[[1, 2]] /.
  Text[a_, {b_, c_}, {1., 0.}] →
  Text[a, {b - 1.5, c}, {0, 0}, {0, 1}];
g[[1, 2]] = g[[1, 2]] /.
  Text[labelx, {b_, c_}, {0., -1.}] →
  Text[labelx, {b, c + 1100}, {0, -1}, {1, 0}];
g[[1, 2]] = g[[1, 2]] /.
  Text[a_, {b_, c_}, {0., -1.}] →
  Text[a, {b, c + 550}, {0, 0}, {0, 1}];
g1 = Show[g,
  AspectRatio -> GoldenRatio * 1.2,
  PlotRange -> All,
  DisplayFunction -> Identity];

(* Center Sorted Yeast Arraylets *)

arraylets = Transpose[arraylets1];
average = Table[1, {a, 1, genes}];
average = N[average / Sqrt[Dot[average, average]]];
arraylets = arraylets - N[Outer[Times, Dot[arraylets, average], average]];
arraylets = Transpose[arraylets];

(* Create Sorted Yeast Arraylets 2 D Red & Green Raster Display *)

contrast = 75 * 1.5;
displaying = Table[
  If[contrast * arraylets[[i, j]] > 0,
    If[contrast * arraylets[[i, j]] < 1, {contrast * arraylets[[i, j]], 0}, {1, 0}],
    If[contrast * arraylets[[i, j]] > -1, {0, -contrast * arraylets[[i, j]]}, {0, 1}]],
  {i, 1, genes}, {j, 1, arrays}];
labelx = "(b) Arraylets";
labely = ColumnForm[{" ", " ", " ", " ", " ", " ", " ", " ", " ", " "}, Center];
framey = {
  {genes - endph5 / 2, " ", 0},
  {genes - (endph5 + endph1) / 2, " ", 0},
  {genes - (endph1 + endph2) / 2, " ", 0},
  {genes - (endph2 + endph3) / 2, " ", 0},
  {genes - (endph3 + endph4) / 2, " ", 0},
  {(genes - endph4) / 2, " ", 0}};
gridy = {
  {genes - endph1 + 0.5, {RGBColor[0, 0, 0]}},
  {genes - endph2 + 0.5, {RGBColor[0, 0, 0]}},
  {genes - endph3 + 0.5, {RGBColor[0, 0, 0]}},
  {genes - endph4 + 0.5, {RGBColor[0, 0, 0]}},
  {genes - endph5 + 0.5, {RGBColor[0, 0, 0]}}};
framex = Table[{a - 0.5, ToString[a]}, {a, 1, arrays}];
size = 7;
sizes = Flatten[
  Table[
    Dimensions[
      Characters[
        framex[[a, 2]]
      ]], {a, 1, arrays}]];
Do[
  Do[framex[[a, 2]] = StringJoin[framex[[a, 2]], " "],
  {b, 1, size - sizes[a]}],
  {a, 1, arrays}];

```

```

g = Show[
  Graphics[
    RasterArray[
      Table[
        RGBColor[displaying[[i, j, 1]], displaying[[i, j, 2]], 0],
        {i, genes, 1, -1}, {j, 1, arrays}
      ]],
    AspectRatio -> 1,
    Frame -> True,
    FrameTicks -> {None, framey, framex, None},
    FrameLabel -> {None, labely, labelx, None},
    GridLines -> {None, gridy},
    DisplayFunction -> Identity];
g = FullGraphics[g];
g[[1, 2]] = g[[1, 2]] /.
  Text[labely, {b_, c_}, {1., 0.}] ->
  Text[labely, {b, c}, {0, 0}, {0, 1}];
g[[1, 2]] = g[[1, 2]] /.
  Text[a_, {b_, c_}, {1., 0.}] ->
  Text[a, {b - 1.5, c}, {0, 0}, {0, 1}];
g[[1, 2]] = g[[1, 2]] /.
  Text[labelx, {b_, c_}, {0., -1.}] ->
  Text[labelx, {b, c + 1100}, {0, -1}, {1, 0}];
g[[1, 2]] = g[[1, 2]] /.
  Text[a_, {b_, c_}, {0., -1.}] ->
  Text[a, {b, c + 550}, {0, 0}, {0, 1}];
g2 = Show[g,
  AspectRatio -> GoldenRatio * 1.2,
  PlotRange -> All,
  DisplayFunction -> Identity];

```

(\* Create Selected Sorted Yeast Arraylets Graph Display \*)

```

arraylets = Transpose[arraylets1];

arraylets3 = Chop[TrigFit[arraylets[[3]], 1, {x, genes - 1}], 0.001]
arraylets4 = Chop[TrigFit[arraylets[[4]], 1, {x, genes - 1}], 0.001]
arraylets5 = Chop[TrigFit[arraylets[[5]], 1, {x, genes - 1}], 0.001]
arraylets14 = Chop[TrigFit[arraylets[[14]], 1, {x, genes - 1}], 0.001]
arraylets15 = Chop[TrigFit[arraylets[[15]], 1, {x, genes - 1}], 0.001]
arraylets16 = Chop[TrigFit[arraylets[[16]], 1, {x, genes - 1}], 0.001]

-0.00350482 Cos[ $\frac{\pi x}{2261}$ ] + 0.0105327 Sin[ $\frac{\pi x}{2261}$ ]

-0.00146993 + 0.011125 Cos[ $\frac{\pi x}{2261}$ ]

0.00621296 Cos[ $\frac{\pi x}{2261}$ ] + 0.00846298 Sin[ $\frac{\pi x}{2261}$ ]

-0.0012217 + 0.00423362 Cos[ $\frac{\pi x}{2261}$ ] + 0.00682806 Sin[ $\frac{\pi x}{2261}$ ]

0.00425716 Cos[ $\frac{\pi x}{2261}$ ] - 0.00622375 Sin[ $\frac{\pi x}{2261}$ ]

-0.00500703 Cos[ $\frac{\pi x}{2261}$ ]

```

```

graph = ParametricPlot[{arraylets3, -x},
  {x, 0, genes - 1},
  PlotStyle -> {RGBColor[0, 0, 0], Thickness[0.016]},
  DisplayFunction -> Identity];
labelx = "(c) Expression Level";
labely = ColumnForm[{" ", " ", " ", " ", " ", " ", " ", " ", " ", " "}, Center];
framex = {{0, "0"}, {0.06, "0.06"}, {0.12, "0.12"};
coordinates = Table[
  If[arraylets[[3, a]] < -0.025*1.2, -0.025*1.2,
  If[arraylets[[3, a]] > 0.125*1.2, 0.125*1.2, arraylets[[3, a]]],
  {a, 1, genes}];
coordinates = Table[{coordinates[[a]], -a + 1}, {a, 1, genes}];
line = Line[coordinates];
g = Show[
  {Graphics[{RGBColor[1, 0, 0], line}},
  graph},
  Frame -> True,
  FrameLabel -> {None, labely, labelx, None},
  FrameTicks -> {None, None, framex, None},
  GridLines -> {{0, RGBColor[0, 0, 0]}, None},
  AspectRatio -> GoldenRatio*1.15,
  PlotRange -> {{-0.025*1.2, 0.125*1.2}, {135, -genes + 1 - 135}},
  DisplayFunction -> Identity];
g = FullGraphics[g];
g[[1, 2]] = g[[1, 2]] /.
  Text[labely, {b_, c_}, {1., 0.}] ->
  Text[labely, {b, c}, {0, 0}, {0, 1}];
g[[1, 2]] = g[[1, 2]] /.
  Text[a_, {b_, c_}, {1., 0.}] ->
  Text[a, {b - 0.01, c}, {0, 0}, {0, 1}];
g[[1, 2]] = g[[1, 2]] /.
  Text[labelx, {b_, c_}, {0., -1.}] ->
  Text[labelx, {b, c + 1125}, {0, -1}, {1, 0}];
g[[1, 2]] = g[[1, 2]] /.
  Text[a_, {b_, c_}, {0., -1.}] ->
  Text[a, {b, c + 575}, {0, 0}, {0, 1}];
p3 = Show[g,
  AspectRatio -> GoldenRatio*1.2765,
  PlotRange -> All,
  DisplayFunction -> Identity];

```

```

graph = ParametricPlot[{arraylets4 + 0.05 * 1.2, -x},
  {x, 0, genes - 1},
  PlotStyle -> {RGBColor[0, 0, 0], Thickness[0.016]},
  DisplayFunction -> Identity];
labelx = "(c) Expression Level";
labely = ColumnForm[{" ", " ", " ", " ", " ", " ", " ", " ", " ", " "}, Center];
framex = {{0, "0"}, {0.06, "0.06"}, {0.12, "0.12"};
coordinates = Table[
  If[arraylets[[4, a]] + 0.05 * 1.2 > 0.125 * 1.2, 0.125 * 1.2,
  If[arraylets[[4, a]] + 0.05 * 1.2 < -0.025 * 1.2, -0.025 * 1.2, arraylets[[4, a]] + 0.05 * 1.2]],
  {a, 1, genes}];
coordinates = Table[{coordinates[[a]], -a + 1}, {a, 1, genes}];
line = Line[coordinates];
g = Show[
  {Graphics[{RGBColor[0, 0, 1], line}},
  graph},
  Frame -> True,
  FrameLabel -> {None, labely, labelx, None},
  FrameTicks -> {None, None, framex, None},
  GridLines -> {{0.05 * 1.2, RGBColor[0, 0, 0]}}, None},
  AspectRatio -> GoldenRatio * 1.15,
  PlotRange -> {{-0.025 * 1.2, 0.125 * 1.2}, {135, -genes + 1 - 135}},
  DisplayFunction -> Identity];
g = FullGraphics[g];
g[[1, 2]] = g[[1, 2]] /.
  Text[labely, {b_, c_}, {1., 0.}] ->
  Text[labely, {b, c}, {0, 0}, {0, 1}];
g[[1, 2]] = g[[1, 2]] /.
  Text[a_, {b_, c_}, {1., 0.}] ->
  Text[a, {b - 0.01, c}, {0, 0}, {0, 1}];
g[[1, 2]] = g[[1, 2]] /.
  Text[labelx, {b_, c_}, {0., -1.}] ->
  Text[labelx, {b, c + 1125}, {0, -1}, {1, 0}];
g[[1, 2]] = g[[1, 2]] /.
  Text[a_, {b_, c_}, {0., -1.}] ->
  Text[a, {b, c + 575}, {0, 0}, {0, 1}];
p4 = Show[g,
  AspectRatio -> GoldenRatio * 1.2765,
  PlotRange -> All,
  DisplayFunction -> Identity];

```



```

graph = ParametricPlot[{arraylets5 + 0.1 * 1.2, -x},
  {x, 0, genes - 1},
  PlotStyle -> {RGBColor[0, 0, 0], Thickness[0.016]},
  DisplayFunction -> Identity];
labelx = "(c) Expression Level";
labely = ColumnForm[{" ", " ", " ", " ", " ", " ", " ", " ", " ", " "}, Center];
framex = {{0, "0"}, {0.06, "0.06"}, {0.12, "0.12"};
coordinates = Table[
  If[arraylets[[5, a]] + 0.1 * 1.2 < -0.025 * 1.2, -0.025 * 1.2,
  If[arraylets[[5, a]] + 0.1 * 1.2 > 0.125 * 1.2, 0.125 * 1.2, arraylets[[5, a]] + 0.1 * 1.2],
  {a, 1, genes}];
coordinates = Table[{coordinates[[a]], -a + 1}, {a, 1, genes}];
line = Line[coordinates];
g = Show[
  {Graphics[{RGBColor[0, 0.5, 0], line}],
  graph},
  Frame -> True,
  FrameLabel -> {None, labely, labelx, None},
  FrameTicks -> {None, None, framex, None},
  GridLines -> {{{0.1 * 1.2, RGBColor[0, 0, 0]}}, None},
  AspectRatio -> GoldenRatio * 1.15,
  PlotRange -> {{-0.025 * 1.2, 0.125 * 1.2}, {135, -genes + 1 - 135}},
  DisplayFunction -> Identity];
g = FullGraphics[g];
g[[1, 2]] = g[[1, 2]] /.
  Text[labely, {b_, c_}, {1., 0.}] ->
  Text[labely, {b, c}, {0, 0}, {0, 1}];
g[[1, 2]] = g[[1, 2]] /.
  Text[a_, {b_, c_}, {1., 0.}] ->
  Text[a, {b - 0.01, c}, {0, 0}, {0, 1}];
g[[1, 2]] = g[[1, 2]] /.
  Text[labelx, {b_, c_}, {0., -1.}] ->
  Text[labelx, {b, c + 1125}, {0, -1}, {1, 0}];
g[[1, 2]] = g[[1, 2]] /.
  Text[a_, {b_, c_}, {0., -1.}] ->
  Text[a, {b, c + 575}, {0, 0}, {0, 1}];
p5 = Show[g,
  AspectRatio -> GoldenRatio * 1.2765,
  PlotRange -> All,
  DisplayFunction -> Identity];

```

```

graph = ParametricPlot[{arraylets14, -x},
  {x, 0, genes - 1},
  PlotStyle -> {RGBColor[0, 0, 0], Thickness[0.016]},
  DisplayFunction -> Identity];
labelx = "(d) Expression Level";
labely = ColumnForm[{" ", " ", " ", " ", " ", " ", " ", " ", " ", " "}, Center];
framex = {{0, "0"}, {0.06, "0.06"}, {0.12, "0.12"};
coordinates = Table[
  If[arraylets[[14, a]] < -0.025*1.2, -0.025*1.2,
  If[arraylets[[14, a]] > 0.125*1.2, 0.125*1.2, arraylets[[14, a]]],
  {a, 1, genes}];
coordinates = Table[{coordinates[[a]], -a + 1}, {a, 1, genes}];
line = Line[coordinates];
g = Show[
  {Graphics[{RGBColor[1, 0, 0], line}],
  graph},
  Frame -> True,
  FrameLabel -> {None, labely, labelx, None},
  FrameTicks -> {None, None, framex, None},
  GridLines -> {{0, RGBColor[0, 0, 0]}, None},
  AspectRatio -> GoldenRatio*1.15,
  PlotRange -> {{-0.025*1.2, 0.125*1.2}, {135, -genes + 1 - 135}},
  DisplayFunction -> Identity];
g = FullGraphics[g];
g[[1, 2]] = g[[1, 2]] /.
  Text[labely, {b_, c_}, {1., 0.}] ->
  Text[labely, {b, c}, {0, 0}, {0, 1}];
g[[1, 2]] = g[[1, 2]] /.
  Text[a_, {b_, c_}, {1., 0.}] ->
  Text[a, {b - 0.01, c}, {0, 0}, {0, 1}];
g[[1, 2]] = g[[1, 2]] /.
  Text[labelx, {b_, c_}, {0., -1.}] ->
  Text[labelx, {b, c + 1125}, {0, -1}, {1, 0}];
g[[1, 2]] = g[[1, 2]] /.
  Text[a_, {b_, c_}, {0., -1.}] ->
  Text[a, {b, c + 575}, {0, 0}, {0, 1}];
p14 = Show[g,
  AspectRatio -> GoldenRatio*1.2765,
  PlotRange -> All,
  DisplayFunction -> Identity];

```

```

graph = ParametricPlot[{arraylets15 + 0.05 * 1.2, -x},
  {x, 0, genes - 1},
  PlotStyle -> {RGBColor[0, 0, 0], Thickness[0.016]},
  DisplayFunction -> Identity];
labelx = "(d) Expression Level";
labely = ColumnForm[{" ", " ", " ", " ", " ", " ", " ", " ", " ", " "}, Center];
framex = {{0, "0"}, {0.06, "0.06"}, {0.12, "0.12"};
coordinates = Table[
  If[arraylets[[15, a]] + 0.05 * 1.2 > 0.125 * 1.2, 0.125 * 1.2,
  If[arraylets[[15, a]] + 0.05 * 1.2 < -0.025 * 1.2, -0.025 * 1.2, arraylets[[15, a]] + 0.05 * 1.2],
  {a, 1, genes}];
coordinates = Table[{coordinates[[a]], -a + 1}, {a, 1, genes}];
line = Line[coordinates];
g = Show[
  {Graphics[{RGBColor[0, 0, 1], line}},
  graph},
  Frame -> True,
  FrameLabel -> {None, labely, labelx, None},
  FrameTicks -> {None, None, framex, None},
  GridLines -> {{{0.05 * 1.2, RGBColor[0, 0, 0]}}, None},
  AspectRatio -> GoldenRatio * 1.15,
  PlotRange -> {{-0.025 * 1.2, 0.125 * 1.2}, {135, -genes + 1 - 135}},
  DisplayFunction -> Identity];
g = FullGraphics[g];
g[[1, 2]] = g[[1, 2]] /.
  Text[labely, {b_, c_}, {1., 0.}] ->
  Text[labely, {b, c}, {0, 0}, {0, 1}];
g[[1, 2]] = g[[1, 2]] /.
  Text[a_, {b_, c_}, {1., 0.}] ->
  Text[a, {b - 0.01, c}, {0, 0}, {0, 1}];
g[[1, 2]] = g[[1, 2]] /.
  Text[labelx, {b_, c_}, {0., -1.}] ->
  Text[labelx, {b, c + 1125}, {0, -1}, {1, 0}];
g[[1, 2]] = g[[1, 2]] /.
  Text[a_, {b_, c_}, {0., -1.}] ->
  Text[a, {b, c + 575}, {0, 0}, {0, 1}];
p15 = Show[g,
  AspectRatio -> GoldenRatio * 1.2765,
  PlotRange -> All,
  DisplayFunction -> Identity];

```

```

graph = ParametricPlot[{arraylets16 + 0.1 * 1.2, -x},
  {x, 0, genes - 1},
  PlotStyle -> {RGBColor[0, 0, 0], Thickness[0.016]},
  DisplayFunction -> Identity];
labelx = "(d) Expression Level";
labely = ColumnForm[{" ", " ", " ", " ", " ", " ", " ", " ", " ", " "}, Center];
framex = {{0, "0"}, {0.06, "0.06"}, {0.12, "0.12"};
coordinates = Table[
  If[arraylets[[16, a]] + 0.1 * 1.2 > 0.125 * 1.2, 0.125 * 1.2, arraylets[[16, a]] + 0.1 * 1.2],
  {a, 1, genes}];
coordinates = Table[{coordinates[[a]], -a + 1}, {a, 1, genes}];
line = Line[coordinates];
g = Show[
  {Graphics[{RGBColor[0, 0.5, 0], line}],
  graph},
  Frame -> True,
  FrameLabel -> {None, labely, labelx, None},
  FrameTicks -> {None, None, framex, None},
  GridLines -> {{{0.1 * 1.2, RGBColor[0, 0, 0]}}, None},
  AspectRatio -> GoldenRatio * 1.15,
  PlotRange -> {{-0.025 * 1.2, 0.125 * 1.2}, {135, -genes + 1 - 135}},
  DisplayFunction -> Identity];
g = FullGraphics[g];
g[[1, 2]] = g[[1, 2]] /.
  Text[labely, {b_, c_}, {1., 0.}] ->
  Text[labely, {b, c}, {0, 0}, {0, 1}];
g[[1, 2]] = g[[1, 2]] /.
  Text[a_, {b_, c_}, {1., 0.}] ->
  Text[a, {b - 0.01, c}, {0, 0}, {0, 1}];
g[[1, 2]] = g[[1, 2]] /.
  Text[labelx, {b_, c_}, {0., -1.}] ->
  Text[labelx, {b, c + 1125}, {0, -1}, {1, 0}];
g[[1, 2]] = g[[1, 2]] /.
  Text[a_, {b_, c_}, {0., -1.}] ->
  Text[a, {b, c + 575}, {0, 0}, {0, 1}];
p16 = Show[g,
  AspectRatio -> GoldenRatio * 1.2765,
  PlotRange -> All,
  DisplayFunction -> Identity];

(* Display Selected Sorted Yeast Arraylets *)

g3 = Show[{p3, p4, p5},
  DisplayFunction -> Identity];
g4 = Show[{p16, p14, p15},
  DisplayFunction -> Identity];

```

```
(* Display Sorted and Reconstructed Human Data *)
```

```
genes = genes2;  
genenames = genenames2;  
arraynames = arraynames2;  
{endph1, endph2, endph3, endph4, endph5} = {3941, 5803, 7574, 9827, 1817};
```

```
(* Reconstruct Sorted Human Data *)
```

```
Do[d2[[a, a]] = 0, {a, 1, 2}];  
Do[d2[[a, a]] = 0, {a, 6, 13}];  
Do[d2[[a, a]] = 0, {a, 17, 18}];  
matrix = Dot[arraylets2, d2, genelets];
```

```
(* Center Sorted Human Data *)
```

```
average = Table[1, {a, 1, arrays}];  
average = N[average / Sqrt[Dot[average, average]]];  
matrix = matrix - N[Outer[Times, Dot[matrix, average], average]];  
matrix = Transpose[matrix];  
average = Table[1, {a, 1, genes}];  
average = N[average / Sqrt[Dot[average, average]]];  
matrix = matrix - N[Outer[Times, Dot[matrix, average], average]];  
matrix = Transpose[matrix];
```

```
(* Create Reconstructed Sorted Human Data 2D Red & Green Raster Display *)
```

```
contrast = 15 * 1.5;  
displaying = Table[  
  If[contrast * matrix[[i, j]] > 0,  
    If[contrast * matrix[[i, j]] < 1, {contrast * matrix[[i, j]], 0}, {1, 0}],  
    If[contrast * matrix[[i, j]] > -1, {0, -contrast * matrix[[i, j]]}, {0, 1}]],  
  {i, 1, genes}, {j, 1, arrays}];  
framex = Table[{a - 0.5, arraynames[[2, a]]}, {a, 1, arrays}];  
framey = {  
  {genes - endph5 / 2, "S"},  
  {genes - (endph5 + endph1) / 2, "G2"},  
  {genes - (endph1 + endph2) / 2, "G2/M"},  
  {genes - (endph2 + endph3) / 2, "M/G1"},  
  {genes - (endph3 + endph4) / 2, "G1/S"},  
  {(genes - endph4) / 2, "S"}];  
gridy = {  
  {genes - endph1 + 0.5, {RGBColor[0, 0, 0]}},  
  {genes - endph2 + 0.5, {RGBColor[0, 0, 0]}},  
  {genes - endph3 + 0.5, {RGBColor[0, 0, 0]}},  
  {genes - endph4 + 0.5, {RGBColor[0, 0, 0]}},  
  {genes - endph5 + 0.5, {RGBColor[0, 0, 0]}}];  
labelx = "(e) Arrays";  
labely = ColumnForm[{" ", "Genes", " ", " ", " ", " ", " ", " ", " ", " "}, Center];  
g = Show[  
  Graphics[  
    RasterArray[  
      Table[  
        RGBColor[displaying[[i, j, 1]], displaying[[i, j, 2]], 0],  
        {i, genes, 1, -1}, {j, 1, arrays}]]],  
  AspectRatio -> 1,  
  Frame -> True,  
  FrameTicks -> {None, framey, framex, None},  
  FrameLabel -> {None, labely, labelx, None},  
  GridLines -> {None, gridy},  
  DisplayFunction -> Identity];
```

```

g = FullGraphics[g];
g[[1, 2]] = g[[1, 2]] /.
  Text[labely, {b_, c_}, {1., 0.}] →
  Text[labely, {b, c}, {0, 0}, {0, 1}];
g[[1, 2]] = g[[1, 2]] /.
  Text[a_, {b_, c_}, {1., 0.}] →
  Text[a, {b - 1.5, c}, {0, 0}, {0, 1}];
g[[1, 2]] = g[[1, 2]] /.
  Text[labelx, {b_, c_}, {0., -1.}] →
  Text[labelx, {b, c + 1100}, {0, -1}, {1, 0}];
g[[1, 2]] = g[[1, 2]] /.
  Text[a_, {b_, c_}, {0., -1.}] →
  Text[a, {b, c + 450}, {0, 0}, {0, 1}];
g5 = Show[g,
  AspectRatio -> GoldenRatio * 2,
  PlotRange -> All,
  DisplayFunction -> Identity];

(* Center Sorted Human Arraylets *)

arraylets = Transpose[arraylets2];
average = Table[1, {a, 1, genes}];
average = N[average / Sqrt[Dot[average, average]]];
arraylets = arraylets - N[Outer[Times, Dot[arraylets, average], average]];
arraylets = Transpose[arraylets];

(* Create Sorted Human Arraylets 2 D Red & Green Raster Display *)

contrast = 125 * 1.5;
displaying = Table[
  If[contrast * arraylets[[i, j]] > 0,
    If[contrast * arraylets[[i, j]] < 1, {contrast * arraylets[[i, j]], 0}, {1, 0}],
    If[contrast * arraylets[[i, j]] > -1, {0, -contrast * arraylets[[i, j]]}, {0, 1}]],
  {i, 1, genes}, {j, 1, arrays}];
labelx = "(f) Arraylets";
labely = ColumnForm[{" ", " ", " ", " ", " ", " ", " ", " ", " ", " ", " "}, Center];
framey = {
  {genes - endph5 / 2, " "},
  {genes - (endph5 + endph1) / 2, " "},
  {genes - (endph1 + endph2) / 2, " "},
  {genes - (endph2 + endph3) / 2, " "},
  {genes - (endph3 + endph4) / 2, " "},
  {(genes - endph4) / 2, " "}};
gridy = {
  {genes - endph1 + 0.5, {RGBColor[0, 0, 0]}},
  {genes - endph2 + 0.5, {RGBColor[0, 0, 0]}},
  {genes - endph3 + 0.5, {RGBColor[0, 0, 0]}},
  {genes - endph4 + 0.5, {RGBColor[0, 0, 0]}},
  {genes - endph5 + 0.5, {RGBColor[0, 0, 0]}}};
framex = Table[{a - 0.5, ToString[a]}, {a, 1, arrays}];
size = 5;
sizes = Flatten[
  Table[
    Dimensions[
      Characters[
        framex[[a, 2]]
      ]], {a, 1, arrays}]];
Do[
  Do[framex[[a, 2]] = StringJoin[framex[[a, 2]], " "],
  {b, 1, size - sizes[a]}],
  {a, 1, arrays}];

```

```

g = Show[
  Graphics[
    RasterArray[
      Table[
        RGBColor[displaying[[i, j, 1]], displaying[[i, j, 2]], 0],
        {i, genes, 1, -1}, {j, 1, arrays}]]],
  AspectRatio -> 1,
  Frame -> True,
  FrameTicks -> {None, framey, framex, None},
  FrameLabel -> {None, labely, labelx, None},
  GridLines -> {None, gridy},
  DisplayFunction -> Identity];
g = FullGraphics[g];
g[[1, 2]] = g[[1, 2]] /.
  Text[labely, {b_, c_}, {1., 0.}] ->
  Text[labely, {b, c}, {0, 0}, {0, 1}];
g[[1, 2]] = g[[1, 2]] /.
  Text[a_, {b_, c_}, {1., 0.}] ->
  Text[a, {b - 1.5, c}, {0, 0}, {0, 1}];
g[[1, 2]] = g[[1, 2]] /.
  Text[labelx, {b_, c_}, {0., -1.}] ->
  Text[labelx, {b, c + 1100}, {0, -1}, {1, 0}];
g[[1, 2]] = g[[1, 2]] /.
  Text[a_, {b_, c_}, {0., -1.}] ->
  Text[a, {b, c + 450}, {0, 0}, {0, 1}];
g6 = Show[g,
  AspectRatio -> GoldenRatio * 2,
  PlotRange -> All,
  DisplayFunction -> Identity];

```

(\* Create Selected Sorted Human Arraylets Graph Display \*)

```

arraylets = Transpose[arraylets2];

arraylets3 = Chop[TrigFit[arraylets[[3]], 1, {x, genes - 1}], 0.001]
arraylets4 = Chop[TrigFit[arraylets[[4]], 1, {x, genes - 1}], 0.001]
arraylets5 = Chop[TrigFit[arraylets[[5]], 1, {x, genes - 1}], 0.001]
arraylets14 = Chop[TrigFit[arraylets[[14]], 1, {x, genes - 1}], 0.001]
arraylets15 = Chop[TrigFit[arraylets[[15]], 1, {x, genes - 1}], 0.001]
arraylets16 = Chop[TrigFit[arraylets[[16]], 1, {x, genes - 1}], 0.001]

-0.0014217 Cos[ $\frac{2 \pi x}{12055}$ ] + 0.00391491 Sin[ $\frac{2 \pi x}{12055}$ ]

0.00502234 Cos[ $\frac{2 \pi x}{12055}$ ]

0.00315384 Cos[ $\frac{2 \pi x}{12055}$ ] + 0.00340225 Sin[ $\frac{2 \pi x}{12055}$ ]

0.00459832 Cos[ $\frac{2 \pi x}{12055}$ ] + 0.00471871 Sin[ $\frac{2 \pi x}{12055}$ ]

0.00100965 + 0.00370318 Cos[ $\frac{2 \pi x}{12055}$ ] - 0.00745771 Sin[ $\frac{2 \pi x}{12055}$ ]

-0.00570353 Cos[ $\frac{2 \pi x}{12055}$ ]

```

```

graph = ParametricPlot[{arraylets3, -x},
  {x, 0, genes - 1},
  PlotStyle -> {RGBColor[0, 0, 0], Thickness[0.016]},
  DisplayFunction -> Identity];
labelx = "(g) Expression Level";
labely = ColumnForm[{" ", " ", " ", " ", " ", " ", " ", " ", " ", " "}, Center];
framex = {{0, "0"}, {0.05, "0.05"}, {0.1, "0.1"};
coordinates = Table[
  If[arraylets[[3, a]] < -0.025, -0.025, arraylets[[3, a]]],
  {a, 1, genes}];
coordinates = Table[{coordinates[[a]], -a + 1}, {a, 1, genes}];
line = Line[coordinates];
g = Show[
  {Graphics[{RGBColor[1, 0, 0], line}],
  graph},
  Frame -> True,
  FrameLabel -> {None, labely, labelx, None},
  FrameTicks -> {None, None, framex, None},
  GridLines -> {{{0, RGBColor[0, 0, 0]}}, None},
  AspectRatio -> GoldenRatio*1.15,
  PlotRange -> {{-0.025, 0.125}, {360, -genes + 1 - 360}},
  DisplayFunction -> Identity];
g = FullGraphics[g];
g[[1, 2]] = g[[1, 2]] /.
  Text[labely, {b_, c_}, {1., 0.}] ->
  Text[labely, {b, c}, {0, 0}, {0, 1}];
g[[1, 2]] = g[[1, 2]] /.
  Text[a_, {b_, c_}, {1., 0.}] ->
  Text[a, {b - 0.01, c}, {0, 0}, {0, 1}];
g[[1, 2]] = g[[1, 2]] /.
  Text[labelx, {b_, c_}, {0., -1.}] ->
  Text[labelx, {b, c + 1150}, {0, -1}, {1, 0}];
g[[1, 2]] = g[[1, 2]] /.
  Text[a_, {b_, c_}, {0., -1.}] ->
  Text[a, {b, c + 550}, {0, 0}, {0, 1}];
p3 = Show[g,
  AspectRatio -> GoldenRatio*2.1275,
  PlotRange -> All,
  DisplayFunction -> Identity];

```



```

graph = ParametricPlot[{arraylets4 + 0.05, -x},
  {x, 0, genes - 1},
  PlotStyle -> {RGBColor[0, 0, 0], Thickness[0.016]},
  DisplayFunction -> Identity];
labelx = "(g) Expression Level";
labely = ColumnForm[{" ", " ", " ", " ", " ", " ", " ", " ", " ", " "}, Center];
framex = {{0, "0"}, {0.05, "0.05"}, {0.1, "0.1"};
coordinates = Table[
  If[arraylets[[4, a]] + 0.05 > 0.125, 0.125, arraylets[[4, a]] + 0.05],
  {a, 1, genes}];
coordinates = Table[{coordinates[[a]], -a + 1}, {a, 1, genes}];
line = Line[coordinates];
g = Show[
  {Graphics[{RGBColor[0, 0, 1], line}],
  graph},
  Frame -> True,
  FrameLabel -> {None, labely, labelx, None},
  FrameTicks -> {None, None, framex, None},
  GridLines -> {{{0.05, RGBColor[0, 0, 0]}}, None},
  AspectRatio -> GoldenRatio * 1.15,
  PlotRange -> {{-0.025, 0.125}, {360, -genes + 1 - 360}},
  DisplayFunction -> Identity];
g = FullGraphics[g];
g[[1, 2]] = g[[1, 2]] /.
  Text[labely, {b_, c_}, {1., 0.}] ->
  Text[labely, {b, c}, {0, 0}, {0, 1}];
g[[1, 2]] = g[[1, 2]] /.
  Text[a_, {b_, c_}, {1., 0.}] ->
  Text[a, {b - 0.01, c}, {0, 0}, {0, 1}];
g[[1, 2]] = g[[1, 2]] /.
  Text[labelx, {b_, c_}, {0., -1.}] ->
  Text[labelx, {b, c + 1150}, {0, -1}, {1, 0}];
g[[1, 2]] = g[[1, 2]] /.
  Text[a_, {b_, c_}, {0., -1.}] ->
  Text[a, {b, c + 550}, {0, 0}, {0, 1}];
p4 = Show[g,
  AspectRatio -> GoldenRatio * 2.1275,
  PlotRange -> All,
  DisplayFunction -> Identity];

```

```

graph = ParametricPlot[{arraylets5 + 0.1, -x},
  {x, 0, genes - 1},
  PlotStyle -> {RGBColor[0, 0, 0], Thickness[0.016]},
  DisplayFunction -> Identity];
labelx = "(g) Expression Level";
labely = ColumnForm[{" ", " ", " ", " ", " ", " ", " ", " ", " ", " "}, Center];
framex = {{0, "0"}, {0.05, "0.05"}, {0.1, "0.1"};
coordinates = Table[
  If[arraylets[[5, a]] + 0.1 > 0.125, 0.125, arraylets[[5, a]] + 0.1,
  {a, 1, genes}];
coordinates = Table[{coordinates[[a]], -a + 1}, {a, 1, genes}];
line = Line[coordinates];
g = Show[
  {Graphics[{RGBColor[0, 0.5, 0], line}],
  graph},
  Frame -> True,
  FrameLabel -> {None, labely, labelx, None},
  FrameTicks -> {None, None, framex, None},
  GridLines -> {{{0.1, RGBColor[0, 0, 0]}}, None},
  AspectRatio -> GoldenRatio * 1.15,
  PlotRange -> {{-0.025, 0.125}, {360, -genes + 1 - 360}},
  DisplayFunction -> Identity];
g = FullGraphics[g];
g[[1, 2]] = g[[1, 2]] /.
  Text[labely, {b_, c_}, {1., 0.}] ->
  Text[labely, {b, c}, {0, 0}, {0, 1}];
g[[1, 2]] = g[[1, 2]] /.
  Text[a_, {b_, c_}, {1., 0.}] ->
  Text[a, {b - 0.01, c}, {0, 0}, {0, 1}];
g[[1, 2]] = g[[1, 2]] /.
  Text[labelx, {b_, c_}, {0., -1.}] ->
  Text[labelx, {b, c + 1150}, {0, -1}, {1, 0}];
g[[1, 2]] = g[[1, 2]] /.
  Text[a_, {b_, c_}, {0., -1.}] ->
  Text[a, {b, c + 550}, {0, 0}, {0, 1}];
p5 = Show[g,
  AspectRatio -> GoldenRatio * 2.1275,
  PlotRange -> All,
  DisplayFunction -> Identity];

```

```

graph = ParametricPlot[{arraylets14, -x},
  {x, 0, genes - 1},
  PlotStyle -> {RGBColor[0, 0, 0], Thickness[0.016]},
  DisplayFunction -> Identity];
labelx = "(h) Expression Level";
labely = ColumnForm[{" ", " ", " ", " ", " ", " ", " ", " ", " ", " "}, Center];
framex = {{0, "0"}, {0.05, "0.05"}, {0.1, "0.1"};
coordinates = Table[
  If[arraylets[[14, a]] < -0.025, -0.025, arraylets[[14, a]]],
  {a, 1, genes}];
coordinates = Table[{coordinates[[a]], -a + 1}, {a, 1, genes}];
line = Line[coordinates];
g = Show[
  {Graphics[{RGBColor[1, 0, 0], line}],
  graph},
  Frame -> True,
  FrameLabel -> {None, labely, labelx, None},
  FrameTicks -> {None, None, framex, None},
  GridLines -> {{{0, RGBColor[0, 0, 0]}}, None},
  AspectRatio -> GoldenRatio*1.15,
  PlotRange -> {{-0.025, 0.125}, {360, -genes + 1 - 360}},
  DisplayFunction -> Identity];
g = FullGraphics[g];
g[[1, 2]] = g[[1, 2]] /.
  Text[labely, {b_, c_}, {1., 0.}] ->
  Text[labely, {b, c}, {0, 0}, {0, 1}];
g[[1, 2]] = g[[1, 2]] /.
  Text[a_, {b_, c_}, {1., 0.}] ->
  Text[a, {b - 0.01, c}, {0, 0}, {0, 1}];
g[[1, 2]] = g[[1, 2]] /.
  Text[labelx, {b_, c_}, {0., -1.}] ->
  Text[labelx, {b, c + 1150}, {0, -1}, {1, 0}];
g[[1, 2]] = g[[1, 2]] /.
  Text[a_, {b_, c_}, {0., -1.}] ->
  Text[a, {b, c + 550}, {0, 0}, {0, 1}];
p14 = Show[g,
  AspectRatio -> GoldenRatio*2.1275,
  PlotRange -> All,
  DisplayFunction -> Identity];

```

```

graph = ParametricPlot[{arraylets15 + 0.05, -x},
  {x, 0, genes - 1},
  PlotStyle -> {RGBColor[0, 0, 0], Thickness[0.016]},
  DisplayFunction -> Identity];
labelx = "(h) Expression Level";
labely = ColumnForm[{" ", " ", " ", " ", " ", " ", " ", " ", " ", " "}, Center];
framex = {{0, "0"}, {0.05, "0.05"}, {0.1, "0.1"};
coordinates = Table[If[arraylets[[15, a]] + 0.05 < -0.025, -0.025,
  If[arraylets[[15, a]] + 0.05 > 0.125, 0.125, arraylets[[15, a]] + 0.05]], {a, 1, genes}];
coordinates = Table[{coordinates[[a]], -a + 1}, {a, 1, genes}];
line = Line[coordinates];
g = Show[
  {Graphics[{RGBColor[0, 0, 1], line}},
  graph},
  Frame -> True,
  FrameLabel -> {None, labely, labelx, None},
  FrameTicks -> {None, None, framex, None},
  GridLines -> {{{0.05, RGBColor[0, 0, 0]}}, None},
  AspectRatio -> GoldenRatio * 1.15,
  PlotRange -> {{-0.025, 0.125}, {360, -genes + 1 - 360}},
  DisplayFunction -> Identity];
g = FullGraphics[g];
g[[1, 2]] = g[[1, 2]] /.
  Text[labely, {b_, c_}, {1., 0.}] ->
  Text[labely, {b, c}, {0, 0}, {0, 1}];
g[[1, 2]] = g[[1, 2]] /.
  Text[a_, {b_, c_}, {1., 0.}] ->
  Text[a, {b - 0.01, c}, {0, 0}, {0, 1}];
g[[1, 2]] = g[[1, 2]] /.
  Text[labelx, {b_, c_}, {0., -1.}] ->
  Text[labelx, {b, c + 1150}, {0, -1}, {1, 0}];
g[[1, 2]] = g[[1, 2]] /.
  Text[a_, {b_, c_}, {0., -1.}] ->
  Text[a, {b, c + 550}, {0, 0}, {0, 1}];
p15 = Show[g,
  AspectRatio -> GoldenRatio * 2.1275,
  PlotRange -> All,
  DisplayFunction -> Identity];

```

```

graph = ParametricPlot[{arraylets16 + 0.1, -x},
  {x, 0, genes - 1},
  PlotStyle -> {RGBColor[0, 0, 0], Thickness[0.016]},
  DisplayFunction -> Identity];
labelx = "(h) Expression Level";
labely = ColumnForm[{" ", " ", " ", " ", " ", " ", " ", " ", " ", " "}, Center];
framex = {{0, "0"}, {0.05, "0.05"}, {0.1, "0.1"};
coordinates = Table[
  If[arraylets[[16, a]] + 0.1 > 0.125, 0.125, arraylets[[16, a]] + 0.1],
  {a, 1, genes}];
coordinates = Table[{coordinates[[a]], -a + 1}, {a, 1, genes}];
line = Line[coordinates];
g = Show[
  {Graphics[{RGBColor[0, 0.5, 0], line}],
  graph},
  Frame -> True,
  FrameLabel -> {None, labely, labelx, None},
  FrameTicks -> {None, None, framex, None},
  GridLines -> {{{0.1, RGBColor[0, 0, 0]}}, None},
  AspectRatio -> GoldenRatio * 1.15,
  PlotRange -> {{-0.025, 0.125}, {360, -genes + 1 - 360}},
  DisplayFunction -> Identity];
g = FullGraphics[g];
g[[1, 2]] = g[[1, 2]] /.
  Text[labely, {b_, c_}, {1., 0.}] ->
  Text[labely, {b, c}, {0, 0}, {0, 1}];
g[[1, 2]] = g[[1, 2]] /.
  Text[a_, {b_, c_}, {1., 0.}] ->
  Text[a, {b - 0.01, c}, {0, 0}, {0, 1}];
g[[1, 2]] = g[[1, 2]] /.
  Text[labelx, {b_, c_}, {0., -1.}] ->
  Text[labelx, {b, c + 1150}, {0, -1}, {1, 0}];
g[[1, 2]] = g[[1, 2]] /.
  Text[a_, {b_, c_}, {0., -1.}] ->
  Text[a, {b, c + 550}, {0, 0}, {0, 1}];
p16 = Show[g,
  AspectRatio -> GoldenRatio * 2.1275,
  PlotRange -> All,
  DisplayFunction -> Identity];

(* Display Selected Sorted Human Arraylets *)

g7 = Show[{p5, p3, p4},
  DisplayFunction -> Identity];
g8 = Show[{p16, p15, p14},
  DisplayFunction -> Identity];

```

(\* Display Reconstructed Sorted Yeast and Human Data, Arraylets and Selected Arraylets \*)

```
Show[{
  Graphics[{Rectangle[{0, 0}, {25, 84}, g5]}],
  Graphics[{Rectangle[{4, 0}, {29, 84}, g6]}],
  Graphics[{Rectangle[{8, 0}, {33, 84}, g7]}],
  Graphics[{Rectangle[{12, 0}, {37, 84}, g8]}],
  Graphics[{Rectangle[{0, 85}, {25, 135}, g1]}],
  Graphics[{Rectangle[{4, 85}, {29, 135}, g2]}],
  Graphics[{Rectangle[{8, 85}, {33, 135}, g3]}],
  Graphics[{Rectangle[{12, 85}, {37, 135}, g4]}]},
PlotRange -> All];
```

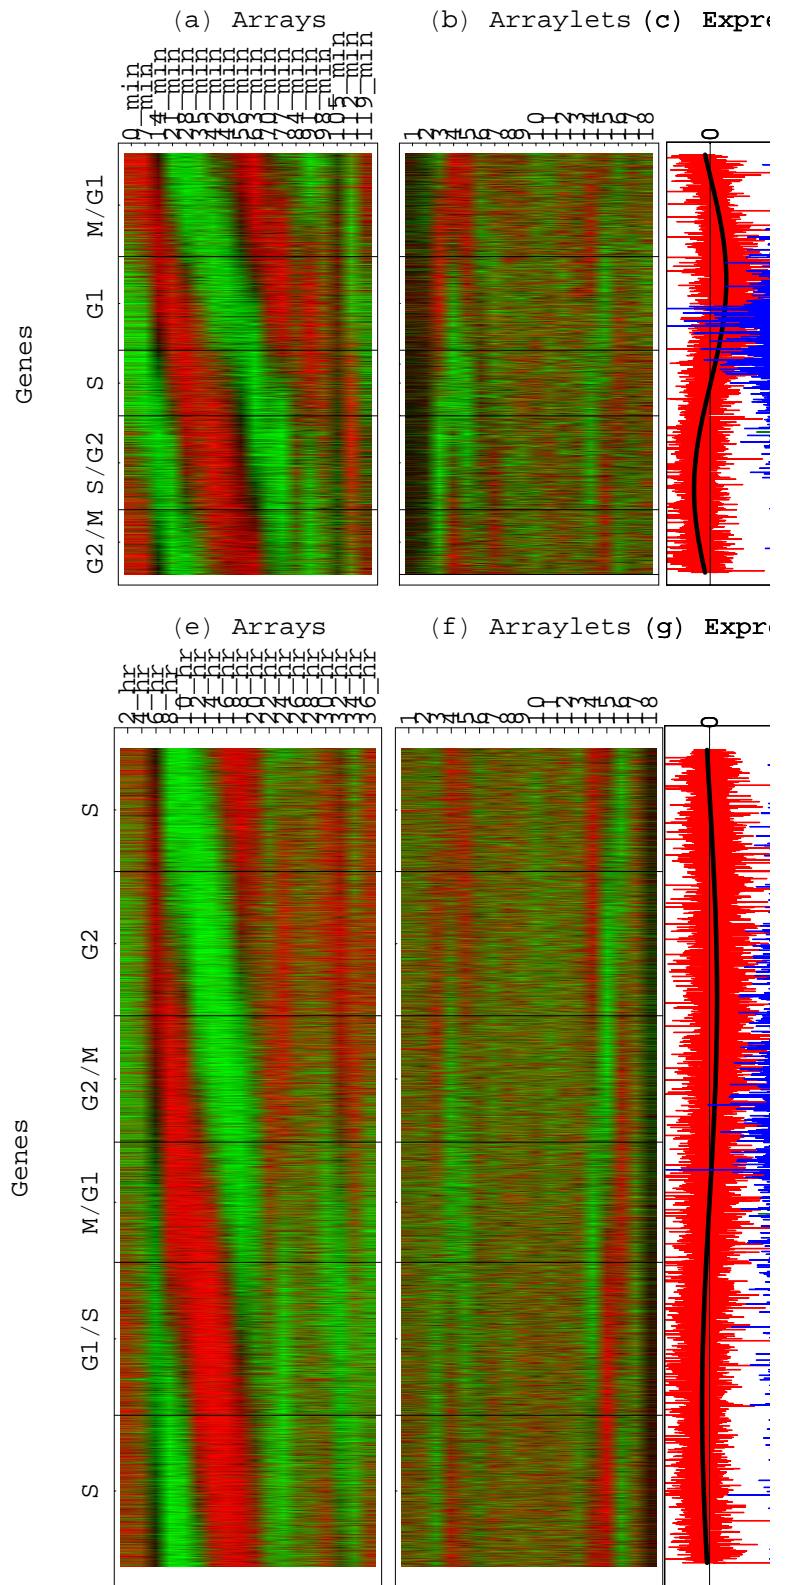

```
(* Display GSVD of Sorted Yeast and Human Data *)
```

```
(* Recalculate GSVD of Sorted Yeast and Human Data *)
```

```
matrix = AppendColumns[matrix1, matrix2];  
{q, r} = QRDecomposition[matrix];  
q = Conjugate[Transpose[q]];  
q1 = TakeRows[q, {1, genes1}];  
{u1, w1, v1} = SingularValues[q1];  
genelets = Dot[v1, r];  
Do[genelets[[a]] = genelets[[a]] / Sqrt[Dot[genelets[[a]], genelets[[a]]],  
  {a, 1, arrays}]  
  
genelets[[2]] = -genelets[[2]];  
genelets[[3]] = -genelets[[3]];  
genelets[[5]] = -genelets[[5]];  
genelets[[14]] = -genelets[[14]];  
genelets[[16]] = -genelets[[16]];  
genelets[[17]] = -genelets[[17]];  
  
arraylets1 = Dot[matrix1, Inverse[genelets]];  
arraylets2 = Dot[matrix2, Inverse[genelets]];  
arraylets1 = Transpose[arraylets1];  
Do[arraylets1[[a]] = arraylets1[[a]] / Sqrt[Dot[arraylets1[[a]], arraylets1[[a]]], {a, 1, arrays}];  
arraylets1 = Transpose[arraylets1];  
arraylets2 = Transpose[arraylets2];  
Do[arraylets2[[a]] = arraylets2[[a]] / Sqrt[Dot[arraylets2[[a]], arraylets2[[a]]], {a, 1, arrays}];  
arraylets2 = Transpose[arraylets2];  
d1 = Chop[Dot[PseudoInverse[arraylets1], matrix1, Inverse[genelets]]];  
d2 = Chop[Dot[PseudoInverse[arraylets2], matrix2, Inverse[genelets]]];
```



```
(* Display Sorted Yeast Data *)
```

```
genes = genes1;  
genenames = genenames1;  
arraynames = arraynames1;  
matrix = matrix1;
```

```
(* Center Sorted Yeast Data *)
```

```
average = Table[1, {a, 1, arrays}];  
average = N[average / Sqrt[Dot[average, average]]];  
matrix = matrix - N[Outer[Times, Dot[matrix, average], average]];  
matrix = Transpose[matrix];  
average = Table[1, {a, 1, genes}];  
average = N[average / Sqrt[Dot[average, average]]];  
matrix = matrix - N[Outer[Times, Dot[matrix, average], average]];  
matrix = Transpose[matrix];
```

```
(* Create Sorted Yeast Data 2 D Red & Green Raster Display *)
```

```
contrast = 10 * 1.5;  
displaying = Table[  
  If[contrast * matrix[[i, j]] > 0,  
    If[contrast * matrix[[i, j]] < 1, {contrast * matrix[[i, j]], 0}, {1, 0}],  
    If[contrast * matrix[[i, j]] > -1, {0, -contrast * matrix[[i, j]]}, {0, 1}]],  
  {i, 1, genes}, {j, 1, arrays}];  
framex = Table[{a - 0.5, arraynames[[2, a]]}, {a, 1, arrays}];  
labelx = "Arrays";  
labely = ColumnForm[{" ", "      Genes", " ", " ", " ", " "}, Center];  
g = Show[  
  Graphics[  
    RasterArray[  
      Table[  
        RGBColor[displaying[[i, j, 1]], displaying[[i, j, 2]], 0],  
        {i, genes, 1, -1}, {j, 1, arrays}]]],  
    AspectRatio -> 1,  
    Frame -> True,  
    FrameTicks -> {None, None, framex, None},  
    FrameLabel -> {None, labely, labelx, None},  
    DisplayFunction -> Identity];  
g = FullGraphics[g];  
g[[1, 2]] = g[[1, 2]] /.  
  Text[labely, {b_, c_}, {1., 0.}] ->  
  Text[labely, {b, c}, {0, 0}, {0, 1}];  
g[[1, 2]] = g[[1, 2]] /.  
  Text[labelx, {b_, c_}, {0., -1.}] ->  
  Text[labelx, {b, c + 1500}, {0, -1}, {1, 0}];  
g[[1, 2]] = g[[1, 2]] /.  
  Text[a_, {b_, c_}, {0., -1.}] ->  
  Text[a, {b, c + 750}, {0, 0}, {0, 1}];  
g1 = Show[g,  
  AspectRatio -> GoldenRatio * 1,  
  PlotRange -> All,  
  DisplayFunction -> Identity];
```

```
(* Center Sorted Yeast Arraylets *)
```

```
arraylets = Transpose[arraylets1];  
average = Table[1, {a, 1, genes}];  
average = N[average / Sqrt[Dot[average, average]]];  
arraylets = arraylets - N[Outer[Times, Dot[arraylets, average], average]];  
arraylets = Transpose[arraylets];
```

```
(* Create Sorted Yeast Arraylets 2 D Red & Green Raster Display *)
```

```
contrast = 75 * 1.5;  
displaying = Table[  
  If[contrast * arraylets[[i, j]] > 0,  
    If[contrast * arraylets[[i, j]] < 1, {contrast * arraylets[[i, j]], 0}, {1, 0}],  
    If[contrast * arraylets[[i, j]] > -1, {0, -contrast * arraylets[[i, j]]}, {0, 1}]],  
  {i, 1, genes}, {j, 1, arrays}];  
labelx = "Arraylets";  
labely = ColumnForm[{" ", " Genes", " ", " ", " ", " "}, Center];  
framex = Table[{a - 0.5, ToString[a]}, {a, 1, arrays}];  
size = 7;  
sizes = Flatten[  
  Table[  
    Dimensions[  
      Characters[  
        framex[[a, 2]]  
      ]], {a, 1, arrays}];  
Do[  
  Do[framex[[a, 2]] = StringJoin[framex[[a, 2]], " "],  
    {b, 1, size - sizes[[a]]},  
    {a, 1, arrays}];  
g = Show[  
  Graphics[  
    RasterArray[  
      Table[  
        RGBColor[displaying[[i, j, 1]], displaying[[i, j, 2]], 0],  
        {i, genes, 1, -1}, {j, 1, arrays}]]],  
    AspectRatio -> 1,  
    Frame -> True,  
    FrameTicks -> {None, None, framex, None},  
    FrameLabel -> {None, labely, labelx, None},  
    DisplayFunction -> Identity];  
g = FullGraphics[g];  
g[[1, 2]] = g[[1, 2]] /.  
  Text[labely, {b_, c_}, {1., 0.}] ->  
  Text[labely, {b, c}, {0, 0}, {0, 1}];  
g[[1, 2]] = g[[1, 2]] /.  
  Text[labelx, {b_, c_}, {0., -1.}] ->  
  Text[labelx, {b, c + 1500}, {0, -1}, {1, 0}];  
g[[1, 2]] = g[[1, 2]] /.  
  Text[a_, {b_, c_}, {0., -1.}] ->  
  Text[a, {b, c + 750}, {0, 0}, {0, 1}];  
g2 = Show[g,  
  AspectRatio -> GoldenRatio * 1,  
  PlotRange -> All,  
  DisplayFunction -> Identity];
```

```
(* Create Yeast Expression Fractions Red & Green Raster Display *)
```

```
contrast = 0.03;
displaying = Table[
  If[contrast*d1[[i, j]] > 0,
    If[contrast*d1[[i, j]] < 1, {contrast*d1[[i, j]], 0}, {1, 0}],
    If[contrast*d1[[i, j]] > -1, {0, -contrast*d1[[i, j]]}, {0, 1}]],
  {i, 1, arrays}, {j, 1, arrays}];
framex = Table[a, {a, 1, arrays}];
sizes = Flatten[
  Table[
    Dimensions[
      Characters[
        ToString[framex[[a]]
      ]]], {a, 1, arrays}]];
Do[
  Do[framex[[a]] = StringJoin[ToString[framex[[a]]], " "],
    {b, 1, size - sizes[[a]]}],
  {a, 1, arrays}];
framex = Table[{a - 0.5, framex[[a]]}, {a, 1, arrays}];
framey = Table[{a + 1 - 0.5, arrays - a}, {a, 0, arrays - 1}];
labely = ColumnForm[{" ", "Arraylets", " "}, Center];
labelx = ColumnForm[{"Genelets", " ", " "}, Center];
g = Show[
  Graphics[
    RasterArray[
      Table[
        RGBColor[displaying[[i, j, 1]], displaying[[i, j, 2]], 0],
        {i, arrays, 1, -1}, {j, 1, arrays}]]],
  AspectRatio -> 1,
  Frame -> True,
  FrameTicks -> {None, framey, framex, None},
  FrameLabel -> {None, labely, labelx, None},
  DisplayFunction -> Identity];
g = FullGraphics[g];
g[[1, 2]] = g[[1, 2]] /.
  Text[labely, {b_, c_}, {1., 0.}] ->
  Text[labely, {b - 4.2, c}, {0, 0}, {0, 1}];
g[[1, 2]] = g[[1, 2]] /.
  Text[labelx, {b_, c_}, {0., -1.}] ->
  Text[labelx, {b, c + 3.6}, {0, -1}, {1, 0}];
g[[1, 2]] = g[[1, 2]] /.
  Text[a_, {b_, c_}, {0., -1.}] ->
  Text[a, {b, c + 3.9}, {0, 0}, {0, 1}];
g3 = Show[g,
  AspectRatio -> 1.05,
  PlotRange -> All,
  DisplayFunction -> Identity];
```

```
(* Center Genelets *)
```

```
average = Table[1, {a, 1, arrays}];  
average = N[average / Sqrt[Dot[average, average]]];  
centergenelets = genelets - N[Outer[Times, Dot[genelets, average], average]];
```

```
(* Create Genelets 2 D Red & Green Raster Display *)
```

```
contrast = 3;  
displaying = Table[  
  If[contrast * centergenelets[[i, j]] > 0,  
    If[contrast * centergenelets[[i, j]] < 1, {contrast * centergenelets[[i, j]], 0}, {1, 0}],  
    If[contrast * centergenelets[[i, j]] > -1, {0, -contrast * centergenelets[[i, j]]}, {0, 1}]],  
  {i, 1, arrays}, {j, 1, arrays}];  
framex = Table[{a - 0.5, arraynames[[2, a]]}, {a, 1, arrays}];  
framey = Table[{a + 1 - 0.5, arrays - a}, {a, 0, arrays - 1}];  
labely = ColumnForm[{" ", "Genelets", " "}, Center];  
labelx = ColumnForm[{"Arrays", " ", " "}, Center];  
g = Show[  
  Graphics[  
    RasterArray[  
      Table[  
        RGBColor[displaying[[i, j, 1]], displaying[[i, j, 2]], 0],  
        {i, arrays, 1, -1}, {j, 1, arrays}]]],  
    AspectRatio -> 1,  
    Frame -> True,  
    FrameTicks -> {None, framey, framex, None},  
    FrameLabel -> {None, labely, labelx, None},  
    DisplayFunction -> Identity];  
g = FullGraphics[g];  
g[[1, 2]] = g[[1, 2]] /.  
  Text[labely, {b_, c_}, {1., 0.}] ->  
  Text[labely, {b - 4.2, c}, {0, 0}, {0, 1}];  
g[[1, 2]] = g[[1, 2]] /.  
  Text[labelx, {b_, c_}, {0., -1.}] ->  
  Text[labelx, {b, c + 3.6}, {0, -1}, {1, 0}];  
g[[1, 2]] = g[[1, 2]] /.  
  Text[a_, {b_, c_}, {0., -1.}] ->  
  Text[a, {b, c + 3.9}, {0, 0}, {0, 1}];  
g4 = Show[g,  
  AspectRatio -> 1.05,  
  PlotRange -> All,  
  DisplayFunction -> Identity];
```

```
(* Display Sorted Human Data *)
```

```
genes = genes2;  
genenames = genenames2;  
arraynames = arraynames2;  
matrix = matrix2;
```

```
(* Center Sorted Human Data *)
```

```
average = Table[1, {a, 1, arrays}];  
average = N[average / Sqrt[Dot[average, average]]];  
matrix = matrix - N[Outer[Times, Dot[matrix, average], average]];  
matrix = Transpose[matrix];  
average = Table[1, {a, 1, genes}];  
average = N[average / Sqrt[Dot[average, average]]];  
matrix = matrix - N[Outer[Times, Dot[matrix, average], average]];  
matrix = Transpose[matrix];
```

```
(* Create Sorted Human Data 2 D Red & Green Raster Display *)
```

```
contrast = 15 * 1.5;  
displaying = Table[  
  If[contrast * matrix[[i, j]] > 0,  
    If[contrast * matrix[[i, j]] < 1, {contrast * matrix[[i, j]], 0}, {1, 0}],  
    If[contrast * matrix[[i, j]] > -1, {0, -contrast * matrix[[i, j]]}, {0, 1}]],  
  {i, 1, genes}, {j, 1, arrays}];  
framex = Table[{a - 0.5, arraynames[[2, a]]}, {a, 1, arrays}];  
labelx = "Arrays";  
labely = ColumnForm[  
  {" ", "                               Genes", " ", " ", " "},  
  Center];  
g = Show[  
  Graphics[  
    RasterArray[  
      Table[  
        RGBColor[displaying[[i, j, 1]], displaying[[i, j, 2]], 0],  
        {i, genes, 1, -1}, {j, 1, arrays}]]],  
    AspectRatio -> 1,  
    Frame -> True,  
    FrameTicks -> {None, None, framex, None},  
    FrameLabel -> {None, labely, labelx, None},  
    DisplayFunction -> Identity];  
g = FullGraphics[g];  
g[[1, 2]] = g[[1, 2]] /.  
  Text[labely, {b_, c_}, {1., 0.}] ->  
  Text[labely, {b, c}, {0, 0}, {0, 1}];  
g[[1, 2]] = g[[1, 2]] /.  
  Text[labelx, {b_, c_}, {0., -1.}] ->  
  Text[labelx, {b, c + 1300}, {0, -1}, {1, 0}];  
g[[1, 2]] = g[[1, 2]] /.  
  Text[a_, {b_, c_}, {0., -1.}] ->  
  Text[a, {b, c + 600}, {0, 0}, {0, 1}];  
g5 = Show[g,  
  AspectRatio -> GoldenRatio * 2,  
  PlotRange -> All,  
  DisplayFunction -> Identity];
```

```
(* Center Sorted Human Arraylets *)
```

```
arraylets = Transpose[arraylets2];  
average = Table[1, {a, 1, genes}];  
average = N[average / Sqrt[Dot[average, average]]];  
arraylets = arraylets - N[Outer[Times, Dot[arraylets, average], average]];  
arraylets = Transpose[arraylets];
```

```
(* Create Sorted Human Arraylets 2 D Red & Green Raster Display *)
```

```
contrast = 125 * 1.5;  
displaying = Table[  
  If[contrast * arraylets[[i, j]] > 0,  
    If[contrast * arraylets[[i, j]] < 1, {contrast * arraylets[[i, j]], 0}, {1, 0}],  
    If[contrast * arraylets[[i, j]] > -1, {0, -contrast * arraylets[[i, j]]}, {0, 1}]],  
  {i, 1, genes}, {j, 1, arrays}];  
labelx = "Arraylets";  
labely = ColumnForm[  
  {" ", "                               Genes", " ", " ", " "},  
  Center];  
framex = Table[{a - 0.5, ToString[a]}, {a, 1, arrays}];  
size = 5;  
sizes = Flatten[  
  Table[  
    Dimensions[  
      Characters[  
        framex[[a, 2]]  
      ]], {a, 1, arrays}];  
Do[  
  Do[framex[[a, 2]] = StringJoin[framex[[a, 2]], " "],  
    {b, 1, size - sizes[[a]]},  
  {a, 1, arrays}];  
g = Show[  
  Graphics[  
    RasterArray[  
      Table[  
        RGBColor[displaying[[i, j, 1]], displaying[[i, j, 2]], 0],  
        {i, genes, 1, -1}, {j, 1, arrays}]]],  
    AspectRatio -> 1,  
    Frame -> True,  
    FrameTicks -> {None, None, framex, None},  
    FrameLabel -> {None, labely, labelx, None},  
    DisplayFunction -> Identity];  
g = FullGraphics[g];  
g[[1, 2]] = g[[1, 2]] /.  
  Text[labely, {b_, c_}, {1., 0.}] ->  
  Text[labely, {b, c}, {0, 0}, {0, 1}];  
g[[1, 2]] = g[[1, 2]] /.  
  Text[labelx, {b_, c_}, {0., -1.}] ->  
  Text[labelx, {b, c + 1300}, {0, -1}, {1, 0}];  
g[[1, 2]] = g[[1, 2]] /.  
  Text[a_, {b_, c_}, {0., -1.}] ->  
  Text[a, {b, c + 600}, {0, 0}, {0, 1}];  
g6 = Show[g,  
  AspectRatio -> GoldenRatio * 2,  
  PlotRange -> All,  
  DisplayFunction -> Identity];
```

```
(* Create Human Expression Fractions Red & Green Raster Display *)
```

```
contrast = 0.03;
displaying = Table[
  If[contrast*d2[[i, j]] > 0,
    If[contrast*d2[[i, j]] < 1, {contrast*d2[[i, j]], 0}, {1, 0}],
    If[contrast*d2[[i, j]] > -1, {0, -contrast*d2[[i, j]]}, {0, 1}]],
  {i, 1, arrays}, {j, 1, arrays}];
framex = Table[a, {a, 1, arrays}];
sizes = Flatten[
  Table[
    Dimensions[
      Characters[
        ToString[framex[[a]]
      ]]], {a, 1, arrays}]];
Do[
  Do[framex[[a]] = StringJoin[ToString[framex[[a]]], " "],
    {b, 1, size - sizes[[a]]}],
  {a, 1, arrays}];
framex = Table[{a - 0.5, framex[[a]]}, {a, 1, arrays}];
framey = Table[{a + 1 - 0.5, arrays - a}, {a, 0, arrays - 1}];
labely = ColumnForm[{" ", "Arraylets", " "}, Center];
labelx = ColumnForm[{"Genelets", " ", " "}, Center];
g = Show[
  Graphics[
    RasterArray[
      Table[
        RGBColor[displaying[[i, j, 1]], displaying[[i, j, 2]], 0],
        {i, arrays, 1, -1}, {j, 1, arrays}]]],
  AspectRatio -> 1,
  Frame -> True,
  FrameTicks -> {None, framey, framex, None},
  FrameLabel -> {None, labely, labelx, None},
  DisplayFunction -> Identity];
g = FullGraphics[g];
g[[1, 2]] = g[[1, 2]] /.
  Text[labely, {b_, c_}, {1., 0.}] ->
  Text[labely, {b - 4, c}, {0, 0}, {0, 1}];
g[[1, 2]] = g[[1, 2]] /.
  Text[labelx, {b_, c_}, {0., -1.}] ->
  Text[labelx, {b, c + 2.2}, {0, -1}, {1, 0}];
g[[1, 2]] = g[[1, 2]] /.
  Text[a_, {b_, c_}, {0., -1.}] ->
  Text[a, {b, c + 3}, {0, 0}, {0, 1}];
g7 = Show[g,
  AspectRatio -> 1.05,
  PlotRange -> All,
  DisplayFunction -> Identity];
```

```
(* Center Genelets *)
```

```
average = Table[1, {a, 1, arrays}];  
average = N[average / Sqrt[Dot[average, average]]];  
centergenelets = genelets - N[Outer[Times, Dot[genelets, average], average]];
```

```
(* Create Genelets 2 D Red & Green Raster Display *)
```

```
contrast = 3;  
displaying = Table[  
  If[contrast * centergenelets[[i, j]] > 0,  
    If[contrast * centergenelets[[i, j]] < 1, {contrast * centergenelets[[i, j]], 0}, {1, 0}],  
    If[contrast * centergenelets[[i, j]] > -1, {0, -contrast * centergenelets[[i, j]]}, {0, 1}]],  
  {i, 1, arrays}, {j, 1, arrays}];  
framex = Table[{a - 0.5, arraynames[[2, a]]}, {a, 1, arrays}];  
framey = Table[{a + 1 - 0.5, arrays - a}, {a, 0, arrays - 1}];  
lably = ColumnForm[{" ", "Genelets", " "}, Center];  
labelx = ColumnForm[{"Arrays", " ", " "}, Center];  
g = Show[  
  Graphics[  
    RasterArray[  
      Table[  
        RGBColor[displaying[[i, j, 1]], displaying[[i, j, 2]], 0],  
        {i, arrays, 1, -1}, {j, 1, arrays}]]],  
    AspectRatio -> 1,  
    Frame -> True,  
    FrameTicks -> {None, framey, framex, None},  
    FrameLabel -> {None, lably, labelx, None},  
    DisplayFunction -> Identity];  
g = FullGraphics[g];  
g[[1, 2]] = g[[1, 2]] /.  
  Text[lably, {b_, c_}, {1., 0.}] ->  
  Text[lably, {b - 4, c}, {0, 0}, {0, 1}];  
g[[1, 2]] = g[[1, 2]] /.  
  Text[labelx, {b_, c_}, {0., -1.}] ->  
  Text[labelx, {b, c + 2.2}, {0, -1}, {1, 0}];  
g[[1, 2]] = g[[1, 2]] /.  
  Text[a_, {b_, c_}, {0., -1.}] ->  
  Text[a, {b, c + 3}, {0, 0}, {0, 1}];  
g8 = Show[g,  
  AspectRatio -> 1.05,  
  PlotRange -> All,  
  DisplayFunction -> Identity];
```



```
(* Display GSVD of Sorted Yeast and Human Data *)
```

```
equal = Show[Graphics[
  Text[StyleForm["=", FontSize -> 20, FontWeight -> Bold], {0, 0}]
], DisplayFunction -> Identity];
times = Show[Graphics[
  Text[StyleForm["x", FontSize -> 20, FontWeight -> Bold], {0, 0}]
], DisplayFunction -> Identity];
doubleverticalbar = Show[Graphics[
  Text[StyleForm["||", FontSize -> 20, FontWeight -> Bold], {0, 0}]
], DisplayFunction -> Identity];

Show[{
  Graphics[{Rectangle[{0, -15}, {25, 84}, g5]}],
  Graphics[{Rectangle[{7, 25}, {25, 84}, equal]}],
  Graphics[{Rectangle[{9, -15}, {29, 84}, g6]}],
  Graphics[{Rectangle[{16, 25}, {29, 84}, times]}],
  Graphics[{Rectangle[{18, 40}, {33, 84}, g7]}],
  Graphics[{Rectangle[{25, 25}, {33, 84}, times]}],
  Graphics[{Rectangle[{27, 40}, {37, 84}, g8]}],
  Graphics[{Rectangle[{0, 85}, {25, 135}, g1]}],
  Graphics[{Rectangle[{7, 81}, {25, 135}, equal]}],
  Graphics[{Rectangle[{9, 85}, {29, 135}, g2]}],
  Graphics[{Rectangle[{16, 81}, {29, 135}, times]}],
  Graphics[{Rectangle[{18, 91}, {33, 135}, g3]}],
  Graphics[{Rectangle[{25, 81}, {33, 135}, times]}],
  Graphics[{Rectangle[{27, 91}, {37, 135}, g4]}],
  Graphics[{Rectangle[{28, 40}, {37, 135}, doubleverticalbar]}]},
PlotRange -> All];
```

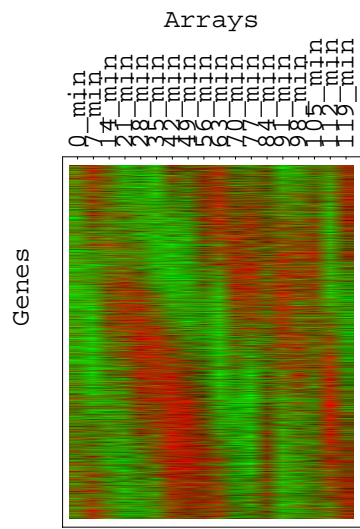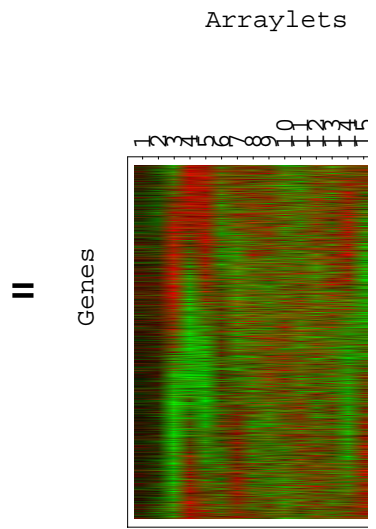

||

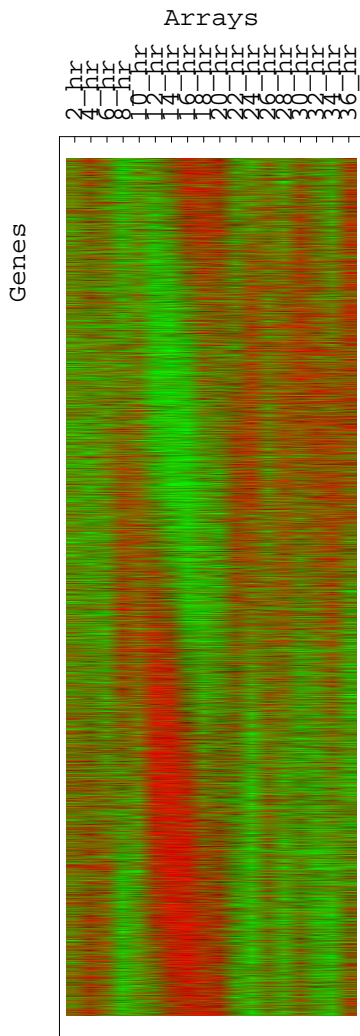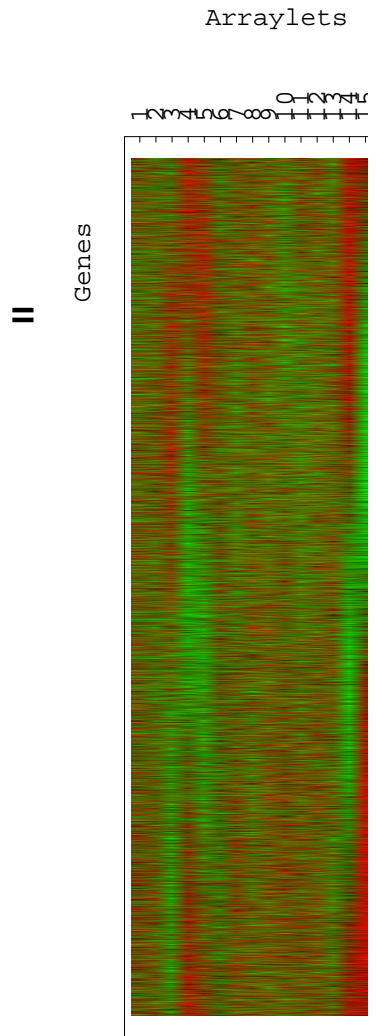

||

(\* Sort Yeast Data in Exclusive Pheromone Response Subspace \*)

(\* Sort Yeast Data \*)

```
genes = genes1;
arraynames = arraynames1;
genenames = TakeColumns[genenames1, 1];
```

(\* Least-Squares Approximate 3 D Subspace of Genelets with 2 D Subspace Using SVD \*)

```
average = Table[1, {a, 1, arrays}];
average = N[average / Sqrt[Dot[average, average]]];
centergenelets1 = genelets[[1]] - N[Outer[Times, Dot[genelets, average], average]][[1]];
centergenelets1 = N[centergenelets1 / Sqrt[Dot[centergenelets1, centergenelets1]]];
centergenelets2 = genelets[[2]] - N[Outer[Times, Dot[genelets, average], average]][[2]];
centergenelets2 = N[centergenelets2 / Sqrt[Dot[centergenelets2, centergenelets2]]];
centergenelets6 = genelets[[6]] - N[Outer[Times, Dot[genelets, average], average]][[6]];
centergenelets6 = N[centergenelets6 / Sqrt[Dot[centergenelets6, centergenelets6]]];
{u, w, v} = SingularValues[{centergenelets1, centergenelets2, centergenelets6}];
Sum[w[[a]]^2, {a, 1, 2}] / Sum[w[[a]]^2, {a, 1, 3}]
```

0.89623

(\* Define 2 D Subspace {x,y}  $\equiv$  {-v[[1]],v[[2]]} \*)

(\* Create -v[[1]], v[[2]] and v[[3]] Graph Displays \*)

```
labelx = ColumnForm[{"(a) Arrays"}, Center];
labely = ColumnForm[{" ", "Expression Level"}, Center];
framex = Table[{a - 1, arraynames[[2, a]]}, {a, 1, arrays}];
framey = {-1, -0.5, 0, 0.5, 1};
coordinates = Table[{a - 1, -v[[1, a]]}, {a, 1, arrays}];
points = Table[Point[coordinates[[a]]], {a, 1, arrays}];
line = Line[coordinates];
g = Show[
  {Graphics[{RGBColor[1, 0, 0], PointSize[0.022], points}],
  Graphics[{RGBColor[1, 0, 0], line}]},
  Frame -> True,
  FrameLabel -> {None, labely, labelx, None},
  GridLines -> {{{17.5, RGBColor[0, 0, 0]}, {19.5, RGBColor[0, 0, 0]}}, {{0, RGBColor[0, 0, 0]}},
  FrameTicks -> {None, framey, framex, None},
  PlotRange -> {-1.05, 1.05},
  DisplayFunction -> Identity];
g = FullGraphics[g];
g[[1, 2]] = g[[1, 2]] /.
  Text[labely, {b_, c_}, {1., 0.}] ->
  Text[labely, {b - 5.4, c}, {0, 0}, {0, 1}];
g[[1, 2]] = g[[1, 2]] /.
  Text[labelx, {b_, c_}, {0., -1.}] ->
  Text[labelx, {b, c + 0.625}, {0, -1}, {1, 0}];
g[[1, 2]] = g[[1, 2]] /.
  Text[a_, {b_, c_}, {0., -1.}] ->
  Text[a, {b, c + 0.25}, {0, 0}, {0, 1}];
p1 = Show[g,
  AspectRatio -> 1.05,
  PlotRange -> All,
  DisplayFunction -> Identity];
```

```

labelx = ColumnForm[{"(a) Arrays"}, Center];
labely = ColumnForm[{" ", "Expression Level"}, Center];
framex = Table[{a - 1, arraynames[[2, a]]}, {a, 1, arrays}];
framey = {-1, -0.5, 0, 0.5, 1};
coordinates = Table[{a - 1, v[[2, a]]}, {a, 1, arrays}];
points = Table[Point[coordinates[[a]]], {a, 1, arrays}];
line = Line[coordinates];
g = Show[
  {Graphics[{RGBColor[0, 0, 1], PointSize[0.022], points}],
   Graphics[{RGBColor[0, 0, 1], line}]},
  Frame -> True,
  FrameLabel -> {None, labely, labelx, None},
  GridLines -> {{{17.5, RGBColor[0, 0, 0]}, {19.5, RGBColor[0, 0, 0]}}, {{0, RGBColor[0, 0, 0]}},
  FrameTicks -> {None, framey, framex, None},
  PlotRange -> {-1.05, 1.05},
  DisplayFunction -> Identity];
g = FullGraphics[g];
g[[1, 2]] = g[[1, 2]] /.
  Text[labely, {b_, c_}, {1., 0.}] ->
  Text[labely, {b - 5.4, c}, {0, 0}, {0, 1}];
g[[1, 2]] = g[[1, 2]] /.
  Text[labelx, {b_, c_}, {0., -1.}] ->
  Text[labelx, {b, c + 0.625}, {0, -1}, {1, 0}];
g[[1, 2]] = g[[1, 2]] /.
  Text[a_, {b_, c_}, {0., -1.}] ->
  Text[a, {b, c + 0.25}, {0, 0}, {0, 1}];
p2 = Show[g,
  AspectRatio -> 1.05,
  PlotRange -> All,
  DisplayFunction -> Identity];

labelx = ColumnForm[{"(b) Arrays"}, Center];
labely = ColumnForm[{" ", " "}, Center];
framex = Table[{a - 1, arraynames[[2, a]]}, {a, 1, arrays}];
framey = {-1, -0.5, 0, 0.5, 1};
coordinates = Table[{a - 1, v[[3, a]]}, {a, 1, arrays}];
points = Table[Point[coordinates[[a]]], {a, 1, arrays}];
line = Line[coordinates];
g = Show[
  {Graphics[{RGBColor[0, 0.5, 0], PointSize[0.022], points}],
   Graphics[{RGBColor[0, 0.5, 0], line}]},
  Frame -> True,
  FrameLabel -> {None, labely, labelx, None},
  GridLines -> {{{17.5, RGBColor[0, 0, 0]}, {19.5, RGBColor[0, 0, 0]}}, {{0, RGBColor[0, 0, 0]}},
  FrameTicks -> {None, framey, framex, None},
  PlotRange -> {-1.05, 1.05},
  DisplayFunction -> Identity];
g = FullGraphics[g];
g[[1, 2]] = g[[1, 2]] /.
  Text[labely, {b_, c_}, {1., 0.}] ->
  Text[labely, {b - 5.4, c}, {0, 0}, {0, 1}];
g[[1, 2]] = g[[1, 2]] /.
  Text[labelx, {b_, c_}, {0., -1.}] ->
  Text[labelx, {b, c + 0.625}, {0, -1}, {1, 0}];
g[[1, 2]] = g[[1, 2]] /.
  Text[a_, {b_, c_}, {0., -1.}] ->
  Text[a, {b, c + 0.25}, {0, 0}, {0, 1}];
p3 = Show[g,
  AspectRatio -> 1.05,
  PlotRange -> All,
  DisplayFunction -> Identity];

```

```
(* Display -v[[1]], v[[2]] and v[[3]] *)
```

```
g = Show[{p2, p1},
  DisplayFunction -> Identity];
Show[GraphicsArray[{g, p3}],
  GraphicsSpacing -> -0.15];
```

(a) Arrays

(b) Arrays

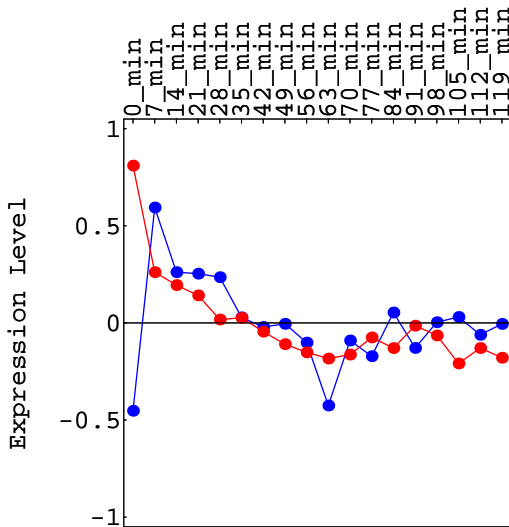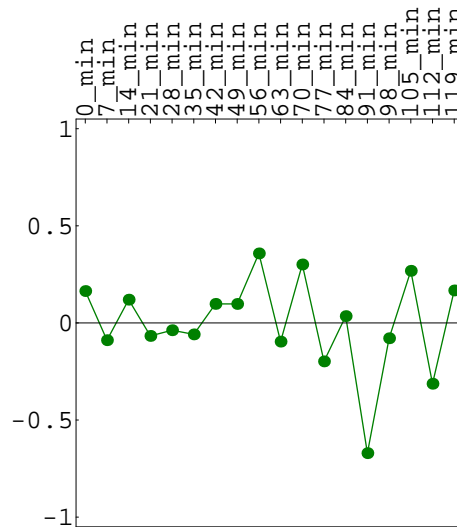

```
(* Calculate Amplitudes of the Projections of the Genelets *)
```

```
a1 = Sqrt[Dot[genelets[[1]], v[[1]]]^2 + Dot[genelets[[1]], v[[2]]]^2];
a2 = Sqrt[Dot[genelets[[2]], v[[1]]]^2 + Dot[genelets[[2]], v[[2]]]^2];
a6 = Sqrt[Dot[genelets[[6]], v[[1]]]^2 + Dot[genelets[[6]], v[[2]]]^2];
```

```
(* Calculate Angular Directions of the Projections of Genelets *)
```

```
c1 = ArcTan[Dot[genelets[[1]], v[[2]]] / Dot[genelets[[1]], v[[1]]];
c2 = ArcTan[Dot[genelets[[2]], v[[2]]] / Dot[genelets[[2]], v[[1]]];
c6 = ArcTan[Dot[genelets[[6]], v[[2]]] / Dot[genelets[[6]], v[[1]]];
c12 = 2 * Abs[Cos[c1 - c2]];
c16 = 2 * Abs[Cos[c1 - c6]];
c26 = 2 * Abs[Cos[c2 - c6]];
```

```
(* Sort Yeast Arrays *)
```

```
(* Center Genelets and Calculate Contributions of Arraylets to Arrays *)
```

```
arraycontributions1 =
  (genelets[[1]] - N[Outer[Times, Dot[genelets, average], average]][[1]]) * d1[[1, 1]];
arraycontributions2 =
  (genelets[[2]] - N[Outer[Times, Dot[genelets, average], average]][[2]]) * d1[[2, 2]];
arraycontributions6 =
  (genelets[[6]] - N[Outer[Times, Dot[genelets, average], average]][[6]]) * d1[[6, 6]];
```

(\* Project Arrays from 3D Arraylets Subspace Onto 2D Subspace \*)

```
coordinates = Table[{
  - (Dot[genelets[[1]], v[[1]] * arraycontributions1[[a]] +
    Dot[genelets[[2]], v[[1]] * arraycontributions2[[a]] +
    Dot[genelets[[6]], v[[1]] * arraycontributions6[[a]]) /
  Sqrt[(a1 * arraycontributions1[[a]] ^ 2 + (a2 * arraycontributions2[[a]] ^ 2 +
    (a6 * arraycontributions6[[a]] ^ 2 +
    c12 * Abs[(a1 * arraycontributions1[[a]] * (a2 * arraycontributions2[[a]])) +
    c16 * Abs[(a1 * arraycontributions1[[a]] * (a6 * arraycontributions6[[a]])] +
    c26 * Abs[(a2 * arraycontributions2[[a]] * (a6 * arraycontributions6[[a]])]),
  (Dot[genelets[[1]], v[[2]] * arraycontributions1[[a]] +
    Dot[genelets[[2]], v[[2]] * arraycontributions2[[a]] +
    Dot[genelets[[6]], v[[2]] * arraycontributions6[[a]]) /
  Sqrt[(a1 * arraycontributions1[[a]] ^ 2 + (a2 * arraycontributions2[[a]] ^ 2 +
    (a6 * arraycontributions6[[a]] ^ 2 +
    c12 * Abs[(a1 * arraycontributions1[[a]] * (a2 * arraycontributions2[[a]])] +
    c16 * Abs[(a1 * arraycontributions1[[a]] * (a6 * arraycontributions6[[a]])] +
    c26 * Abs[(a2 * arraycontributions2[[a]] * (a6 * arraycontributions6[[a]])]),
  {a, 1, arrays}];
```

(\* Create Parameter Graph of Yeast Arrays Projected Onto 2D Subspace \*)

```
Clear[points];
points1 = Point[coordinates[[1]]];
points2 = {Point[coordinates[[2]]], Point[coordinates[[3]]], Point[coordinates[[4]]]};
points3 = {Point[coordinates[[5]]], Point[coordinates[[6]]]};
points4 = {
  Point[coordinates[[7]]], Point[coordinates[[8]]], Point[coordinates[[9]]],
  Point[coordinates[[10]]], Point[coordinates[[11]]], Point[coordinates[[12]]],
  Point[coordinates[[13]]], Point[coordinates[[14]]], Point[coordinates[[15]]],
  Point[coordinates[[16]]], Point[coordinates[[17]]], Point[coordinates[[18]]]};
textcoordinates = coordinates;
Do[
  textcoordinates[[a, 1]] = If[
    textcoordinates[[a, 1]] > 0,
    textcoordinates[[a, 1]] - 0.085,
    textcoordinates[[a, 1]] + 0.095],
  {a, 1, 9}];
Do[textcoordinates[[a, 1]] = If[
  textcoordinates[[a, 1]] > 0,
  textcoordinates[[a, 1]] - 0.11,
  textcoordinates[[a, 1]] + 0.12],
  {a, 10, arrays}];
textcoordinates[[1]] = textcoordinates[[1]] + {0.02, -0.08};
textcoordinates[[3]] = textcoordinates[[3]] + {0.18, 0.02};
textcoordinates[[4]] = textcoordinates[[4]] + {0.18, 0};
textcoordinates[[5]] = textcoordinates[[5]] - {0.18, 0};
textcoordinates[[7]] = textcoordinates[[7]] + {-0.02, 0.1};
textcoordinates[[8]] = textcoordinates[[8]] + {0, 0.03};
textcoordinates[[9]] = textcoordinates[[9]] + {-0.02, 0.12};
textcoordinates[[11]] = textcoordinates[[11]] - {0.21, 0.06};
textcoordinates[[13]] = textcoordinates[[13]] + {0, 0.06};
textcoordinates[[15]] = textcoordinates[[15]] + {-0.21, 0.02};
textcoordinates[[16]] = textcoordinates[[16]] + {-0.21, 0.12};
textcoordinates[[17]] = textcoordinates[[17]] - {0.02, 0.08};
textcoordinates[[18]] = textcoordinates[[18]] + {-0.21, 0.08};
```

```

texts = Table[Text[a, textcoordinates[[a]], {a, 1, arrays}];
p = Show[
  {Graphics[{RGBColor[1, 0, 0], PointSize[0.035], points1}],
  Graphics[{RGBColor[1, 0.5, 0], PointSize[0.035], points2}],
  Graphics[{RGBColor[0, 0.5, 0], PointSize[0.035], points3}],
  Graphics[{RGBColor[0, 0, 1], PointSize[0.035], points4}],
  Graphics[{RGBColor[1, 0, 0], Text["E1", {1.0, -0.5}]}],
  Graphics[{RGBColor[1, 0.5, 0], Text["E2", {1.0, 0.5}]}],
  Graphics[{RGBColor[0, 0, 0], Text["M1", {0.65, 0.9}]}],
  Graphics[{RGBColor[0, 0.5, 0], Text["M2", {-0.65, 0.9}]}],
  Graphics[{RGBColor[0, 0, 1], Text["L1", {-1.0, -0.5}]}],
  Graphics[{RGBColor[0.75, 0, 1], Text["L2", {-0.65, -0.9}]}],
  Graphics[{RGBColor[0, 0, 0], Text["(a)", {-1., 0.95}]}],
  Graphics[{RGBColor[0, 0, 0], Text["|x>", {0.85, 0.08}]}],
  Graphics[{RGBColor[0, 0, 0], Text["|y>", {0.12, 0.915}]}],
  Graphics[{RGBColor[0, 0, 0], Text["|α1", {-0.92, 0.75}]}],
  Graphics[{RGBColor[0, 0, 0], Text["|α2", {-0.35, 0.08}]}],
  Graphics[{RGBColor[0, 0, 0], Text["|α6", {0.92, 0.8}]}],
  Graphics[texts],
  Graphics[{RGBColor[0, 0, 0], Circle[{0, 0}, 0.85,
    {ArcTan[coordinates[[1, 2]] / coordinates[[1, 1]], 0}]}],
  Graphics[{RGBColor[0, 0, 0], Arrow[
    {0.85 * Cos[-0.05], 0.85 * Sin[-0.05]}, {0.85 * Cos[0], 0.85 * Sin[0]},
    HeadCenter -> 0.5, HeadLength -> 0.035, HeadWidth -> 0.75}],
  Graphics[{RGBColor[0, 0, 0], Arrow[{0, 0}, coordinates[[1]],
    HeadCenter -> 0.5, HeadLength -> 0.035, HeadWidth -> 0.75}],
  Graphics[{RGBColor[0, 0, 0], Text["r", {0.8, -0.15}]}],
  Graphics[{RGBColor[0, 0, 0], Text["φ", {0.775, -0.06}]}],
  Graphics[{RGBColor[0, 0, 0], Dashing[{0.03, 0.02}], Circle[{0, 0}, 0.5]}],
  Graphics[{RGBColor[0, 0, 0], Dashing[{0.03, 0.02}], Circle[{0, 0}, 1]}],
  Graphics[{RGBColor[0, 0, 0], Dashing[{0.03, 0.02}], Line[{{0, 1.05}, {0, -1.05}]}],
  Graphics[{RGBColor[0, 0, 0], Dashing[{0.03, 0.02}], Line[{{-1.15, 0}, {1.15, 0}]}],
  Graphics[{RGBColor[0, 0, 0], Arrow[{1.15, -1.15 * Tan[c1]}, {-1.15, 1.15 * Tan[c1]},
    HeadCenter -> 0.5, HeadLength -> 0.035, HeadWidth -> 0.75}],
  Graphics[{RGBColor[0, 0, 0], Arrow[{-1.15, 1.15 * Tan[c2]}, {1.15, -1.15 * Tan[c2]},
    HeadCenter -> 0.5, HeadLength -> 0.035, HeadWidth -> 0.75}],
  Graphics[{RGBColor[0, 0, 0], Arrow[{-1.15, 1.15 * Tan[c6]}, {1.15, -1.15 * Tan[c6]},
    HeadCenter -> 0.5, HeadLength -> 0.035, HeadWidth -> 0.75}],
  AspectRatio -> 1,
  PlotRange -> {{-1.15, 1.15}, {-1.05, 1.05}},
  Frame -> True,
  FrameTicks -> False,
  FrameLabel -> {None, None, None, None},
  GridLines -> {None, None},
  DisplayFunction -> Identity];
p = FullGraphics[p];
p[[1, 2]] = p[[1, 2]] /.
  Text[labely, {b_, c_}, {1., 0.}] ->
  Text[labely, {-1.18, 0}, {0, 0}, {0, 1}];
g1 = Show[p,
  AspectRatio -> 0.95,
  PlotRange -> All,
  DisplayFunction -> Identity];

```

```
(* Sort Yeast Genes *)
```

```
(* Center Arraylets and Calculate Contributions of Genelets to Genes *)
```

```
centerarraylets = Transpose[arraylets1];  
average = Table[1, {a, 1, genes}];  
average = N[average / Sqrt[Dot[average, average]]];  
centerarraylets = centerarraylets - N[Outer[Times, Dot[centerarraylets, average], average]];  
centerarraylets = Transpose[centerarraylets];  
genecontributions = Transpose[Dot[centerarraylets, d1]];
```

```
(* Project Genes from 3 D Genelets Subspace Onto 2 D Subspace *)
```

```
coordinates = Table[{  
  - (Dot[genelets[[1]], v[[1]] * genecontributions[[1, a]] +  
    Dot[genelets[[2]], v[[1]] * genecontributions[[2, a]] +  
    Dot[genelets[[6]], v[[1]] * genecontributions[[6, a]]) /  
  Sqrt[(a1 * genecontributions[[1, a]] ^ 2 + (a2 * genecontributions[[2, a]] ^ 2 +  
    (a6 * genecontributions[[6, a]] ^ 2 +  
    c12 * Abs[a1 * genecontributions[[1, a]] * (a2 * genecontributions[[2, a]])] +  
    c16 * Abs[a1 * genecontributions[[1, a]] * (a6 * genecontributions[[6, a]])] +  
    c26 * Abs[a2 * genecontributions[[2, a]] * (a6 * genecontributions[[6, a]])]),  
  (Dot[genelets[[1]], v[[2]] * genecontributions[[1, a]] +  
    Dot[genelets[[2]], v[[2]] * genecontributions[[2, a]] +  
    Dot[genelets[[6]], v[[2]] * genecontributions[[6, a]]) /  
  Sqrt[(a1 * genecontributions[[1, a]] ^ 2 + (a2 * genecontributions[[2, a]] ^ 2 +  
    (a6 * genecontributions[[6, a]] ^ 2 +  
    c12 * Abs[a1 * genecontributions[[1, a]] * (a2 * genecontributions[[2, a]])] +  
    c16 * Abs[a1 * genecontributions[[1, a]] * (a6 * genecontributions[[6, a]])] +  
    c26 * Abs[a2 * genecontributions[[2, a]] * (a6 * genecontributions[[6, a]])]),  
  {a, 1, genes}];
```

```
(* Create Parameter Graph of 172 Yeast Pheromone Response Genes Projected Onto 2 D Subspace *)
```

```
Clear[points, radii];  
stream = StringJoin[name, ":Desktop Folder:PNAS Data:Yeast_Pheromone_Classify.txt"];  
list = ReadList[stream, Word, RecordLists -> True, NullWords -> True];  
list = Drop[list, 1];  
points = {points1, points2, points3, points4, points5, points6};  
radii = {radii1, radii2, radii3, radii4, radii5, radii6};  
stages = {"E1", "E2", "M1", "M2", "L1", "L2"};  
Do[{  
  position = Position[list, stages[[b]]],  
  table = Table[list[[position[[a, 1]], 1]], {a, 1, Dimensions[position][[1]]},  
  position = Table[Position[genenames, table[[a]]], {a, 1, Dimensions[table][[1]]},  
  table = Flatten[Position[position, {}]],  
  Do[  
    position = Drop[position, {table[[a]], table[[a]]}],  
    {a, Dimensions[table][[1]], 1, -1}],  
  points[[b]] = Table[Point[coordinates[[position[[a, 1, 1]]]], {a, 1, Dimensions[position][[1]]},  
  radii[[b]] = Table[  
    Sqrt[coordinates[[position[[a, 1, 1]], 1]] ^ 2 + coordinates[[position[[a, 1, 1]], 2]] ^ 2,  
    {a, 1, Dimensions[position][[1]]}],  
  {b, 1, Dimensions[stages][[1]]}]
```



```
Dimensions[points[[1]]][[1]]
Dimensions[points[[2]]][[1]]
Dimensions[points[[3]]][[1]]
Dimensions[points[[4]]][[1]]
Dimensions[points[[5]]][[1]]
Dimensions[points[[6]]][[1]]
```

37

15

37

23

22

38

```
radii = Sort[Flatten[radii], OrderedQ[{{#1}, {#2}}] &];
N[Round[radii[[42]] * 100 / 100]
N[Round[radii[[43]] * 100 / 100]
```

0.49

0.51

(\* 172 pheromone response genes, 37 in E1, 15 in E2, 37 in M1, 23 in M2, 22 in L1, 38 in L2. \*)

(\* For 130 genes, 50% or more of the contributions of the 6 genelets add up. \*)

```

kar4 = coordinates[Position[genenames, "YCL055W"][[1, 1]]];
cik1 = coordinates[Position[genenames, "YMR198W"][[1, 1]]];
p = Show[
  {Graphics[{RGBColor[0, 0, 0], Dashing[{0.03, 0.02}], Circle[{0, 0}, 0.5]}],
  Graphics[{RGBColor[0, 0, 0], Dashing[{0.03, 0.02}], Circle[{0, 0}, 1]}],
  Graphics[{RGBColor[0, 0, 0], Dashing[{0.03, 0.02}], Line[{0, 1.05}, {0, -1.05}]}],
  Graphics[{RGBColor[0, 0, 0], Dashing[{0.03, 0.02}], Line[{-1.15, 0}, {1.15, 0}]}],
  Graphics[{RGBColor[0.75, 0, 1], PointSize[0.02], points[[6]}],
  Graphics[{RGBColor[1, 0.5, 0], PointSize[0.02], points[[2]}],
  Graphics[{RGBColor[1, 0, 0], PointSize[0.02], points[[1]}],
  Graphics[{RGBColor[1, 1, 0], PointSize[0.02], points[[3]}],
  Graphics[{RGBColor[0, 0.5, 0], PointSize[0.02], points[[4]}],
  Graphics[{RGBColor[0, 0, 1], PointSize[0.02], points[[5]}],
  Graphics[{RGBColor[1, 0, 0], Text["E1", {1.0, -0.5}]}],
  Graphics[{RGBColor[1, 0.5, 0], Text["E2", {1.0, 0.5}]}],
  Graphics[{RGBColor[0, 0, 0], Text["M1", {0.65, 0.9}]}],
  Graphics[{RGBColor[0, 0.5, 0], Text["M2", {-0.65, 0.9}]}],
  Graphics[{RGBColor[0, 0, 1], Text["L1", {-1.0, -0.5}]}],
  Graphics[{RGBColor[0.75, 0, 1], Text["L2", {-0.65, -0.9}]}],
  Graphics[{RGBColor[0, 0, 0], Text["(b)", {-1., 0.95}]}],
  Graphics[{RGBColor[0, 0, 0], Text["|y", {0.12, 0.915}]}],
  Graphics[{RGBColor[0, 0, 0], Text["|y1", {-0.92, 0.75}]}],
  Graphics[{RGBColor[0, 0, 0], Text["|y2", {0.825, -0.1}]}],
  Graphics[{RGBColor[0, 0, 0], Text["|y6", {0.92, 0.8}]}],
  Graphics[{RGBColor[1, 0, 0], PointSize[0.02], Point[kar4]}],
  Graphics[{RGBColor[0, 0, 0], Arrow[{0.9, -0.75}, kar4,
    HeadCenter -> 0.5, HeadLength -> 0.035, HeadWidth -> 0.75]}],
  Graphics[{RGBColor[0, 0, 0], Text["KAR4", {0.9, -0.85}]}],
  Graphics[{RGBColor[1, 0, 0], PointSize[0.02], Point[cik1]}],
  Graphics[{RGBColor[0, 0, 0], Arrow[{0.725, -0.875}, cik1,
    HeadCenter -> 0.5, HeadLength -> 0.035, HeadWidth -> 0.75]}],
  Graphics[{RGBColor[0, 0, 0], Text["CIK1", {0.725, -0.975}]}],
  Graphics[{RGBColor[0, 0, 0], Dashing[{0.03, 0.02}], Circle[{0, 0}, 0.5]}],
  Graphics[{RGBColor[0, 0, 0], Dashing[{0.03, 0.02}], Circle[{0, 0}, 1]}],
  Graphics[{RGBColor[0, 0, 0], Arrow[{1.15, -1.15 * Tan[c1]}, {-1.15, 1.15 * Tan[c1]},
    HeadCenter -> 0.5, HeadLength -> 0.035, HeadWidth -> 0.75]}],
  Graphics[{RGBColor[0, 0, 0], Arrow[{-1.15, 1.15 * Tan[c2]}, {1.15, -1.15 * Tan[c2]},
    HeadCenter -> 0.5, HeadLength -> 0.035, HeadWidth -> 0.75]}],
  Graphics[{RGBColor[0, 0, 0], Arrow[{-1.15, 1.15 * Tan[c6]}, {1.15, -1.15 * Tan[c6]},
    HeadCenter -> 0.5, HeadLength -> 0.035, HeadWidth -> 0.75]}],
  AspectRatio -> 1,
  PlotRange -> {{-1.15, 1.15}, {-1.05, 1.05}},
  Frame -> True,
  FrameTicks -> False,
  FrameLabel -> {None, None, None, None},
  GridLines -> {None, None},
  DisplayFunction -> Identity];
p = FullGraphics[p];
p[[1, 2]] = p[[1, 2]] /.
  Text[labely, {b_, c_}, {1., 0.}] ->
  Text[labely, {-1.18, 0}, {0, 0}, {0, 1}];
g2 = Show[p,
  AspectRatio -> 0.95,
  PlotRange -> All,
  DisplayFunction -> Identity];

```

(\* Display Both Arrays & Genes Parameter Graphs \*)

```
Show[GraphicsArray[{g1, g2}],  
GraphicsSpacing -> 0];
```

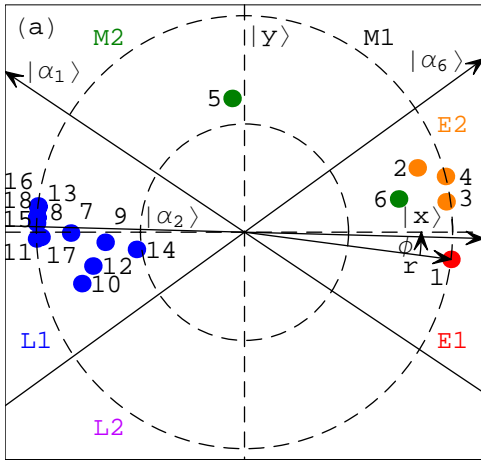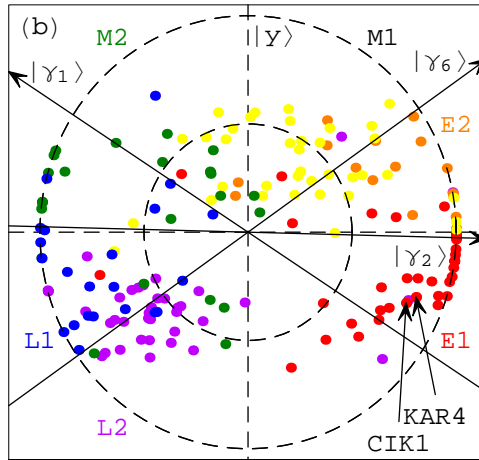

```
(* Reconstruct Yeast Data in Exclusive Pheromone Response Subspace *)
```

```
(* Sort Yeast Genes *)
```

```
matrix = matrix1;  
genes = genes1;  
arraynames = arraynames1;  
genenames = genenames1;
```

```
(* Center Arraylets and Calculate Contributions of Genelets to Genes *)
```

```
centerarraylets = Transpose[arraylets1];  
average = Table[1, {a, 1, genes}];  
average = N[average / Sqrt[Dot[average, average]]];  
centerarraylets = centerarraylets - N[Outer[Times, Dot[centerarraylets, average], average]];  
centerarraylets = Transpose[centerarraylets];  
genecontributions = Transpose[Dot[centerarraylets, d1]];
```

```
(* Project Genes from 3 D Genelets Subspace Onto 2 D Subspace *)
```

```
coordinates = Table[{  
  - (Dot[genelets[[1]], v[[1]]] * genecontributions[[1, a]] +  
    Dot[genelets[[2]], v[[1]]] * genecontributions[[2, a]] +  
    Dot[genelets[[6]], v[[1]]] * genecontributions[[6, a]]) /  
  Sqrt[(a1 * genecontributions[[1, a]] ^ 2 + (a2 * genecontributions[[2, a]] ^ 2 +  
    (a6 * genecontributions[[6, a]] ^ 2 +  
    c12 * Abs[(a1 * genecontributions[[1, a]] * (a2 * genecontributions[[2, a]])] +  
    c16 * Abs[(a1 * genecontributions[[1, a]] * (a6 * genecontributions[[6, a]])] +  
    c26 * Abs[(a2 * genecontributions[[2, a]] * (a6 * genecontributions[[6, a]])] ]],  
  (Dot[genelets[[1]], v[[2]]] * genecontributions[[1, a]] +  
    Dot[genelets[[2]], v[[2]]] * genecontributions[[2, a]] +  
    Dot[genelets[[6]], v[[2]]] * genecontributions[[6, a]]) /  
  Sqrt[(a1 * genecontributions[[1, a]] ^ 2 + (a2 * genecontributions[[2, a]] ^ 2 +  
    (a6 * genecontributions[[6, a]] ^ 2 +  
    c12 * Abs[(a1 * genecontributions[[1, a]] * (a2 * genecontributions[[2, a]])] +  
    c16 * Abs[(a1 * genecontributions[[1, a]] * (a6 * genecontributions[[6, a]])] +  
    c26 * Abs[(a2 * genecontributions[[2, a]] * (a6 * genecontributions[[6, a]])] ]],  
  {a, 1, genes}];
```

```
(* Define the Initial Phase *)
```

```
zerophase = Pi / 2;
```

(\* Sort Genes According to Phases in 2D Subspace \*)

```
coordinates = Table[{
  coordinates[[a, 1]] / Sqrt[coordinates[[a, 1]]^2 + coordinates[[a, 2]]^2],
  coordinates[[a, 2]] / Sqrt[coordinates[[a, 1]]^2 + coordinates[[a, 2]]^2]},
{a, 1, genes}];
coordinates = Table[{
  -coordinates[[a, 1]] * Cos[zerophase] - coordinates[[a, 2]] * Sin[zerophase],
  -coordinates[[a, 2]] * Cos[zerophase] + coordinates[[a, 1]] * Sin[zerophase]},
{a, 1, genes}];
coordinates = Table[{
  coordinates[[a, 1]],
  coordinates[[a, 2]],
  N[ArcTan[coordinates[[a, 1]] / coordinates[[a, 2]]] / Pi},
{a, 1, genes}];
sortmatrix = AppendRows[coordinates, genenames, matrix];
sortmatrix = Sort[sortmatrix, OrderedQ[{{#1}, {#2}}] &];
negative1 = 2358;
positive1 = 2359;
sortmatrix[[negative1, 1]]
sortmatrix[[positive1, 1]]

-0.00066054

0.000366875

sortmatrix = Transpose[Drop[Transpose[sortmatrix], {1}]];
sortmatrix = AppendColumns[
  Sort[
    TakeRows[sortmatrix, {1, negative1}],
    OrderedQ[{{#2}, {#1}}] &],
  Sort[
    TakeRows[sortmatrix, {positive1, genes}],
    OrderedQ[{{#1}, {#2}}] &];
phases = TakeColumns[sortmatrix, {2, 2}];
sortmatrix = Transpose[Drop[Transpose[sortmatrix], {1, 2}]];
```

(\* Classify Gene Phases into Pheromone Response Phases \*)

```
ph1 = c6 / Pi;  
ph2 = 0.5;  
ph3 = c1 / Pi;  
ph4 = 1 + c6 / Pi;  
ph5 = 1;  
ph6 = c2 / Pi;
```

```
endph6 = 640;  
beginph1 = 641;  
phases[[endph6]] - ph1  
phases[[beginph1]] - ph1
```

{0.000221009}

{-0.000301123}

```
endph1 = 1241;  
beginph2 = 1242;  
phases[[endph1]] - ph2  
phases[[beginph2]] - ph2
```

{-0.999615}

{-0.000682573}

```
endph2 = 1835;  
beginph3 = 1836;  
phases[[endph2]] - ph3  
phases[[beginph3]] - ph3
```

{0.000045203}

{-0.000284979}

```
endph3 = 3129;  
beginph4 = 3130;  
phases[[endph3]] - ph4  
phases[[beginph4]] - ph4
```

{-0.999914}

{-1.00006}

```
endph4 = 3687;  
beginph5 = 3688;  
phases[[endph4]] - ph5  
phases[[beginph5]] - ph5
```

{-1.49993}

{-0.50056}

```
endph5 = 4496;  
beginph6 = 4497;  
phases[[endph5]] - ph6  
phases[[beginph6]] - ph6
```

{0.0000461515}

{-0.000172979}

(\* 4523 yeast genes, 809 in E1, 667 in E2, 601 in M1, 594 in M2, 1294 in L1, 558 in L2. \*)

```
(* Reconstruct Data With Sorted Genes *)
```

```
matrix1 = TakeColumns[sortmatrix, {7, arrays + 6}];  
genenames1 = TakeColumns[sortmatrix, {1, 6}];
```

```
(* Calculate GSVD of Sorted Yeast and Human Data *)
```

```
matrix = AppendColumns[matrix1, matrix2];  
{q, r} = QRDecomposition[matrix];  
q = Conjugate[Transpose[q]];  
q1 = TakeRows[q, {1, genes1}];  
{u1, w1, v1} = SingularValues[q1];  
genelets = Dot[v1, r];  
Do[genelets[[a]] = genelets[[a]] / Sqrt[Dot[genelets[[a]], genelets[[a]]],  
  {a, 1, arrays}]
```

```
genelets[[2]] = -genelets[[2]];  
genelets[[5]] = -genelets[[5]];  
genelets[[14]] = -genelets[[14]];  
genelets[[16]] = -genelets[[16]];  
genelets[[17]] = -genelets[[17]];  
genelets[[18]] = -genelets[[18]];
```

```
arraylets1 = Dot[matrix1, Inverse[genelets]];  
arraylets2 = Dot[matrix2, Inverse[genelets]];  
arraylets1 = Transpose[arraylets1];  
Do[arraylets1[[a]] = arraylets1[[a]] / Sqrt[Dot[arraylets1[[a]], arraylets1[[a]]], {a, 1, arrays}];  
arraylets1 = Transpose[arraylets1];  
arraylets2 = Transpose[arraylets2];  
Do[arraylets2[[a]] = arraylets2[[a]] / Sqrt[Dot[arraylets2[[a]], arraylets2[[a]]], {a, 1, arrays}];  
arraylets2 = Transpose[arraylets2];  
d1 = Chop[Dot[PseudoInverse[arraylets1], matrix1, Inverse[genelets]]];  
d2 = Chop[Dot[PseudoInverse[arraylets2], matrix2, Inverse[genelets]]];
```

```
(* Display Sorted and Reconstructed Yeast Data *)
```

```
genes = genes1;  
genenames = genenames1;  
arraynames = arraynames1;  
{endph1, endph2, endph3, endph4, endph5, endph6} = {1241, 1835, 3129, 3687, 4496, 640};
```

```
(* Reconstruct Sorted Yeast Data *)
```

```
Do[d1[[a, a]] = 0, {a, 3, 5}];  
Do[d1[[a, a]] = 0, {a, 7, 18}];  
matrix = Dot[arraylets1, d1, genelets];
```

```
(* Center Sorted Yeast Data *)
```

```
average = Table[1, {a, 1, arrays}];  
average = N[average / Sqrt[Dot[average, average]]];  
matrix = matrix - N[Outer[Times, Dot[matrix, average], average]];  
matrix = Transpose[matrix];  
average = Table[1, {a, 1, genes}];  
average = N[average / Sqrt[Dot[average, average]]];  
matrix = matrix - N[Outer[Times, Dot[matrix, average], average]];  
matrix = Transpose[matrix];
```

```
(* Create Reconstructed Sorted Yeast Data 2D Red & Green Raster Display *)
```

```
contrast = 10 * 1.5;
displaying = Table[
  If[contrast * matrix[[i, j]] > 0,
    If[contrast * matrix[[i, j]] < 1, {contrast * matrix[[i, j]], 0}, {1, 0}],
    If[contrast * matrix[[i, j]] > -1, {0, -contrast * matrix[[i, j]]}, {0, 1}]],
  {i, 1, genes}, {j, 1, arrays}];
framex = Table[{a - 0.5, arraynames[[2, a]]}, {a, 1, arrays}];
framey = {
  {genes - endph6 / 2, "E2"},
  {genes - (endph6 + endph1) / 2, "M1"},
  {genes - (endph1 + endph2) / 2, "M2"},
  {genes - (endph2 + endph3) / 2, "L1"},
  {genes - (endph3 + endph4) / 2, "L2"},
  {genes - (endph4 + endph5) / 2, "E1"},
  {genes - endph5 / 2, "E2"}];
gridy = {
  {genes - endph5 + 0.5, {RGBColor[0, 0, 0]}},
  {genes - endph6 + 0.5, {RGBColor[0, 0, 0]}},
  {genes - endph1 + 0.5, {RGBColor[0, 0, 0]}},
  {genes - endph2 + 0.5, {RGBColor[0, 0, 0]}},
  {genes - endph3 + 0.5, {RGBColor[0, 0, 0]}},
  {genes - endph4 + 0.5, {RGBColor[0, 0, 0]}}];
labelx = "(a) Arrays";
labely = ColumnForm[{" ", "Genes", " ", " ", " ", " ", " ", " ", " "}, Center];
g = Show[
  Graphics[
    RasterArray[
      Table[
        RGBColor[displaying[[i, j, 1]], displaying[[i, j, 2]], 0],
        {i, genes, 1, -1}, {j, 1, arrays}]]],
  AspectRatio -> 1,
  Frame -> True,
  FrameTicks -> {None, framey, framex, None},
  FrameLabel -> {None, labely, labelx, None},
  GridLines -> {None, gridy},
  DisplayFunction -> Identity];
g = FullGraphics[g];
g[[1, 2]] = g[[1, 2]] /.
  Text[labely, {b_, c_}, {1., 0.}] ->
  Text[labely, {b, c}, {0, 0}, {0, 1}];
g[[1, 2]] = g[[1, 2]] /.
  Text[a_, {b_, c_}, {1., 0.}] ->
  Text[a, {b - 1.5, c}, {0, 0}, {0, 1}];
g[[1, 2]] = g[[1, 2]] /.
  Text[labelx, {b_, c_}, {0., -1.}] ->
  Text[labelx, {b, c + 1100}, {0, -1}, {1, 0}];
g[[1, 2]] = g[[1, 2]] /.
  Text[a_, {b_, c_}, {0., -1.}] ->
  Text[a, {b, c + 550}, {0, 0}, {0, 1}];
g1 = Show[g,
  AspectRatio -> GoldenRatio * 1.2,
  PlotRange -> All,
  DisplayFunction -> Identity];
```

```
(* Center Sorted Yeast Arraylets *)
```

```
arraylets = Transpose[arraylets1];
average = Table[1, {a, 1, genes}];
average = N[average / Sqrt[Dot[average, average]]];
arraylets = arraylets - N[Outer[Times, Dot[arraylets, average], average]];
arraylets = Transpose[arraylets];
```



(\* Create Sorted Yeast Arraylets 2D Red & Green Raster Display \*)

```

contrast = 75 * 1.5;
displaying = Table[
  If[contrast * arraylets[[i, j]] > 0,
    If[contrast * arraylets[[i, j]] < 1, {contrast * arraylets[[i, j]], 0}, {1, 0}],
    If[contrast * arraylets[[i, j]] > -1, {0, -contrast * arraylets[[i, j]]}, {0, 1}]],
  {i, 1, genes}, {j, 1, arrays}];
labelx = "(b) Arraylets";
labely = ColumnForm[{" ", " ", " ", " ", " ", " ", " ", " ", " ", " ", " ", " "}, Center];
framey = {
  {genes - endph6 / 2, " "},
  {genes - (endph6 + endph1) / 2, " "},
  {genes - (endph1 + endph2) / 2, " "},
  {genes - (endph2 + endph3) / 2, " "},
  {genes - (endph3 + endph4) / 2, " "},
  {genes - (endph4 + endph5) / 2, " "},
  {(genes - endph5) / 2, " "}};
gridy = {
  {genes - endph1 + 0.5, {RGBColor[0, 0, 0]}},
  {genes - endph2 + 0.5, {RGBColor[0, 0, 0]}},
  {genes - endph3 + 0.5, {RGBColor[0, 0, 0]}},
  {genes - endph4 + 0.5, {RGBColor[0, 0, 0]}},
  {genes - endph5 + 0.5, {RGBColor[0, 0, 0]}}];
framex = Table[{a - 0.5, ToString[a]}, {a, 1, arrays}];
size = 7;
sizes = Flatten[
  Table[
    Dimensions[
      Characters[
        framex[[a, 2]]
      ]], {a, 1, arrays}]];
Do[
  Do[framex[[a, 2]] = StringJoin[framex[[a, 2]], " "],
    {b, 1, size - sizes[[a]]}],
  {a, 1, arrays}];
g = Show[
  Graphics[
    RasterArray[
      Table[
        RGBColor[displaying[[i, j, 1]], displaying[[i, j, 2]], 0],
        {i, genes, 1, -1}, {j, 1, arrays}
      ]],
    AspectRatio -> 1,
    Frame -> True,
    FrameTicks -> {None, framey, framex, None},
    FrameLabel -> {None, labely, labelx, None},
    GridLines -> {None, gridy},
    DisplayFunction -> Identity];
g = FullGraphics[g];
g[[1, 2]] = g[[1, 2]] /.
  Text[labely, {b_, c_}, {1., 0.}] ->
  Text[labely, {b, c}, {0, 0}, {0, 1}];
g[[1, 2]] = g[[1, 2]] /.
  Text[a_, {b_, c_}, {1., 0.}] ->
  Text[a, {b - 1.5, c}, {0, 0}, {0, 1}];
g[[1, 2]] = g[[1, 2]] /.
  Text[labelx, {b_, c_}, {0., -1.}] ->
  Text[labelx, {b, c + 1100}, {0, -1}, {1, 0}];
g[[1, 2]] = g[[1, 2]] /.
  Text[a_, {b_, c_}, {0., -1.}] ->
  Text[a, {b, c + 550}, {0, 0}, {0, 1}];

```

```

g2 = Show[g,
  AspectRatio -> GoldenRatio*1.2,
  PlotRange -> All,
  DisplayFunction -> Identity];

(* Create Selected Sorted Yeast Arraylets Graph Display *)

arraylets = Transpose[arraylets1];

labelx = "(c) Expression Level";
labely = ColumnForm[{" ", " ", " ", " ", " ", " ", " ", " ", " ", " "}, Center];
framex = {{0, "0      "}, {0.06, "0.06  "}, {0.12, "0.12  "}};
coordinates = Table[
  If[arraylets[[1, a]] < -0.025*1.2, -0.025*1.2,
    If[arraylets[[1, a]] > 0.125*1.2, 0.125*1.2, arraylets[[1, a]]],
  {a, 1, genes}];
coordinates = Table[{coordinates[[a]], -a + 1}, {a, 1, genes}];
line = Line[coordinates];
g = Show[
  Graphics[{RGBColor[1, 0, 0], line}],
  Frame -> True,
  FrameLabel -> {None, labely, labelx, None},
  FrameTicks -> {None, None, framex, None},
  GridLines -> {{0, RGBColor[0, 0, 0]}}, None},
  AspectRatio -> GoldenRatio*1.15,
  PlotRange -> {{-0.025*1.2, 0.125*1.2}, {135, -genes + 1 - 135}},
  DisplayFunction -> Identity];
g = FullGraphics[g];
g[[1, 2]] = g[[1, 2]] /.
  Text[labely, {b_, c_}, {1., 0.}] ->
  Text[labely, {b, c}, {0, 0}, {0, 1}];
g[[1, 2]] = g[[1, 2]] /.
  Text[a_, {b_, c_}, {1., 0.}] ->
  Text[a, {b - 0.01, c}, {0, 0}, {0, 1}];
g[[1, 2]] = g[[1, 2]] /.
  Text[labelx, {b_, c_}, {0., -1.}] ->
  Text[labelx, {b, c + 1125}, {0, -1}, {1, 0}];
g[[1, 2]] = g[[1, 2]] /.
  Text[a_, {b_, c_}, {0., -1.}] ->
  Text[a, {b, c + 575}, {0, 0}, {0, 1}];
p1 = Show[g,
  AspectRatio -> GoldenRatio*1.2765,
  PlotRange -> All,
  DisplayFunction -> Identity];

```

```

labelx = "(c) Expression Level";
labely = ColumnForm[{" ", " ", " ", " ", " ", " ", " ", " ", " ", " "}, Center];
framex = {{0, "0"}, {0.06, "0.06"}, {0.12, "0.12"}};
coordinates = Table[
  If[arraylets[[2, a]] + 0.05*1.2 > 0.125*1.2, 0.125*1.2,
  If[arraylets[[2, a]] + 0.05*1.2 < -0.025*1.2, -0.025*1.2, arraylets[[2, a]] + 0.05*1.2]],
  {a, 1, genes}];
coordinates = Table[{coordinates[[a]], -a + 1}, {a, 1, genes}];
line = Line[coordinates];
g = Show[
  Graphics[{RGBColor[0, 0, 1], line}],
  Frame -> True,
  FrameLabel -> {None, labely, labelx, None},
  FrameTicks -> {None, None, framex, None},
  GridLines -> {{{0.05*1.2, RGBColor[0, 0, 0]}}, None},
  AspectRatio -> GoldenRatio*1.15,
  PlotRange -> {{-0.025*1.2, 0.125*1.2}, {135, -genes + 1 - 135}},
  DisplayFunction -> Identity];
g = FullGraphics[g];
g[[1, 2]] = g[[1, 2]] /.
  Text[labely, {b_, c_}, {1., 0.}] ->
  Text[labely, {b, c}, {0, 0}, {0, 1}];
g[[1, 2]] = g[[1, 2]] /.
  Text[a_, {b_, c_}, {1., 0.}] ->
  Text[a, {b - 0.01, c}, {0, 0}, {0, 1}];
g[[1, 2]] = g[[1, 2]] /.
  Text[labelx, {b_, c_}, {0., -1.}] ->
  Text[labelx, {b, c + 1125}, {0, -1}, {1, 0}];
g[[1, 2]] = g[[1, 2]] /.
  Text[a_, {b_, c_}, {0., -1.}] ->
  Text[a, {b, c + 575}, {0, 0}, {0, 1}];
p2 = Show[g,
  AspectRatio -> GoldenRatio*1.2765,
  PlotRange -> All,
  DisplayFunction -> Identity];

```

```

labelx = "(c) Expression Level";
labely = ColumnForm[{" ", " ", " ", " ", " ", " ", " ", " ", " ", " ", " "}, Center];
framex = {{0, "0"}, {0.06, "0.06"}, {0.12, "0.12"}};
coordinates = Table[
  If[arraylets[[6, a]] + 0.1*1.2 < -0.025*1.2, -0.025*1.2,
  If[arraylets[[6, a]] + 0.1*1.2 > 0.125*1.2, 0.125*1.2, arraylets[[6, a]] + 0.1*1.2]],
  {a, 1, genes}];
coordinates = Table[{coordinates[[a]], -a + 1}, {a, 1, genes}];
line = Line[coordinates];
g = Show[
  Graphics[{RGBColor[0, 0.5, 0], line}],
  Frame -> True,
  FrameLabel -> {None, labely, labelx, None},
  FrameTicks -> {None, None, framex, None},
  GridLines -> {{{0.1*1.2, RGBColor[0, 0, 0]}}, None},
  AspectRatio -> GoldenRatio*1.15,
  PlotRange -> {{-0.025*1.2, 0.125*1.2}, {135, -genes + 1 - 135}},
  DisplayFunction -> Identity];
g = FullGraphics[g];
g[[1, 2]] = g[[1, 2]] /.
  Text[labely, {b_, c_}, {1., 0.}] ->
  Text[labely, {b, c}, {0, 0}, {0, 1}];
g[[1, 2]] = g[[1, 2]] /.
  Text[a_, {b_, c_}, {1., 0.}] ->
  Text[a, {b - 0.01, c}, {0, 0}, {0, 1}];
g[[1, 2]] = g[[1, 2]] /.
  Text[labelx, {b_, c_}, {0., -1.}] ->
  Text[labelx, {b, c + 1125}, {0, -1}, {1, 0}];
g[[1, 2]] = g[[1, 2]] /.
  Text[a_, {b_, c_}, {0., -1.}] ->
  Text[a, {b, c + 575}, {0, 0}, {0, 1}];
p6 = Show[g,
  AspectRatio -> GoldenRatio*1.2765,
  PlotRange -> All,
  DisplayFunction -> Identity];

(* Display Selected Sorted Yeast Arraylets *)

g3 = Show[{p6, p2, p1},
  DisplayFunction -> Identity];

```

(\* Display Reconstructed Sorted Yeast and Human Data, Arraylets and Selected Arraylets \*)

```
Show[GraphicsArray[{g1, g2, g3}],  
GraphicsSpacing -> -0.2];
```

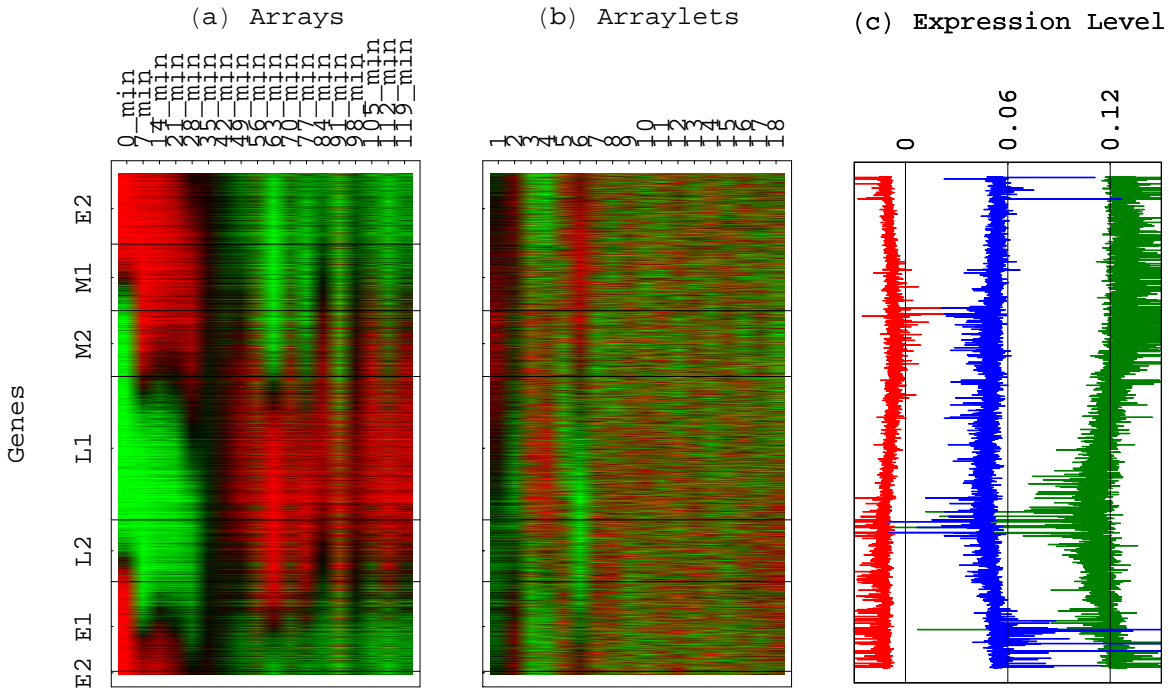

```
(* Sort Human Data in Exclusive Stress Response Subspace *)
```

```
(* Sort Human Data *)
```

```
genes = genes2;  
arraynames = arraynames2;  
genenames = TakeColumns[genenames2, 1];
```

```
(* Least-Squares Approximate 3 D Subspace of Genelets with 2 D Subspace Using SVD *)
```

```
average = Table[1, {a, 1, arrays}];  
average = N[average / Sqrt[Dot[average, average]]];  
centergenelets6 = genelets[[6]] - N[Outer[Times, Dot[genelets, average], average]][[6]];  
centergenelets6 = N[centergenelets6 / Sqrt[Dot[centergenelets6, centergenelets6]]];  
centergenelets17 = genelets[[17]] - N[Outer[Times, Dot[genelets, average], average]][[17]];  
centergenelets17 = N[centergenelets17 / Sqrt[Dot[centergenelets17, centergenelets17]]];  
centergenelets18 = genelets[[18]] - N[Outer[Times, Dot[genelets, average], average]][[18]];  
centergenelets18 = N[centergenelets18 / Sqrt[Dot[centergenelets18, centergenelets18]]];  
{u, w, v} = SingularValues[{centergenelets6, centergenelets17, centergenelets18}];  
Sum[w[[a]]^2, {a, 1, 2}] / Sum[w[[a]]^2, {a, 1, 3}]
```

```
0.777199
```

```
(* Define 2 D Subspace {x,y} ≡ {-v[[1]],v[[2]]} *)
```

```
(* Create -v[[1]], v[[2]] and v[[3]] Graph Displays *)
```

```
labelx = ColumnForm[{"(a) Arrays"}, Center];  
labely = ColumnForm[{" ", "Expression Level"}, Center];  
framex = Table[{a - 1, arraynames[[2, a]]}, {a, 1, arrays}];  
framey = {-1, -0.5, 0, 0.5, 1};  
coordinates = Table[{a - 1, -v[[1, a]]}, {a, 1, arrays}];  
points = Table[Point[coordinates[[a]]], {a, 1, arrays}];  
line = Line[coordinates];  
g = Show[  
  {Graphics[{RGBColor[1, 0, 0], PointSize[0.022], points}],  
  Graphics[{RGBColor[1, 0, 0], line}]},  
  Frame -> True,  
  FrameLabel -> {None, labely, labelx, None},  
  GridLines -> {None, {{0, RGBColor[0, 0, 0]}}},  
  FrameTicks -> {None, framey, framex, None},  
  PlotRange -> {-1.05, 1.05},  
  DisplayFunction -> Identity];  
g = FullGraphics[g];  
g[[1, 2]] = g[[1, 2]] /.  
  Text[labely, {b_, c_}, {1., 0.}] ->  
  Text[labely, {b - 5.4, c}, {0, 0}, {0, 1}];  
g[[1, 2]] = g[[1, 2]] /.  
  Text[labelx, {b_, c_}, {0., -1.}] ->  
  Text[labelx, {b, c + 0.625}, {0, -1}, {1, 0}];  
g[[1, 2]] = g[[1, 2]] /.  
  Text[a_, {b_, c_}, {0., -1.}] ->  
  Text[a, {b, c + 0.25}, {0, 0}, {0, 1}];  
p1 = Show[g,  
  AspectRatio -> 1.05,  
  PlotRange -> All,  
  DisplayFunction -> Identity];
```

```

labelx = ColumnForm[{"(a) Arrays"}, Center];
labely = ColumnForm[{" ", "Expression Level"}, Center];
framex = Table[{a - 1, arraynames2[[2, a]]}, {a, 1, arrays}];
framey = {-1, -0.5, 0, 0.5, 1};
coordinates = Table[{a - 1, v[[2, a]]}, {a, 1, arrays}];
points = Table[Point[coordinates[[a]]], {a, 1, arrays}];
line = Line[coordinates];
g = Show[
  {Graphics[{RGBColor[0, 0, 1], PointSize[0.022], points}],
  Graphics[{RGBColor[0, 0, 1], line}]},
  Frame -> True,
  FrameLabel -> {None, labely, labelx, None},
  GridLines -> {None, {{0, RGBColor[0, 0, 0]}}},
  FrameTicks -> {None, framey, framex, None},
  PlotRange -> {-1.05, 1.05},
  DisplayFunction -> Identity];
g = FullGraphics[g];
g[[1, 2]] = g[[1, 2]] /.
  Text[labely, {b_, c_}, {1., 0.}] ->
  Text[labely, {b - 5.4, c}, {0, 0}, {0, 1}];
g[[1, 2]] = g[[1, 2]] /.
  Text[labelx, {b_, c_}, {0., -1.}] ->
  Text[labelx, {b, c + 0.625}, {0, -1}, {1, 0}];
g[[1, 2]] = g[[1, 2]] /.
  Text[a_, {b_, c_}, {0., -1.}] ->
  Text[a, {b, c + 0.25}, {0, 0}, {0, 1}];
p2 = Show[g,
  AspectRatio -> 1.05,
  PlotRange -> All,
  DisplayFunction -> Identity];

```

```

labelx = ColumnForm[{"(b) Arrays"}, Center];
labely = ColumnForm[{" ", " "}, Center];
framex = Table[{a - 1, arraynames[[2, a]]}, {a, 1, arrays}];
framey = {-1, -0.5, 0, 0.5, 1};
coordinates = Table[{a - 1, v[[3, a]]}, {a, 1, arrays}];
points = Table[Point[coordinates[[a]]], {a, 1, arrays}];
line = Line[coordinates];
g = Show[
  {Graphics[{RGBColor[0, 0.5, 0], PointSize[0.022], points}],
  Graphics[{RGBColor[0, 0.5, 0], line}]},
  Frame -> True,
  FrameLabel -> {None, labely, labelx, None},
  GridLines -> {None, {{0, RGBColor[0, 0, 0]}}},
  FrameTicks -> {None, framey, framex, None},
  PlotRange -> {-1.05, 1.05},
  DisplayFunction -> Identity];
g = FullGraphics[g];
g[[1, 2]] = g[[1, 2]] /.
  Text[labely, {b_, c_}, {1., 0.}] ->
  Text[labely, {b - 5.4, c}, {0, 0}, {0, 1}];
g[[1, 2]] = g[[1, 2]] /.
  Text[labelx, {b_, c_}, {0., -1.}] ->
  Text[labelx, {b, c + 0.625}, {0, -1}, {1, 0}];
g[[1, 2]] = g[[1, 2]] /.
  Text[a_, {b_, c_}, {0., -1.}] ->
  Text[a, {b, c + 0.25}, {0, 0}, {0, 1}];
p3 = Show[g,
  AspectRatio -> 1.05,
  PlotRange -> All,
  DisplayFunction -> Identity];

```

```
(* Display -v[[1]], v[[2]] and v[[3]] *)
```

```
g = Show[{p2, p1},
  DisplayFunction -> Identity];
Show[GraphicsArray[{g, p3}],
  GraphicsSpacing -> -0.15];
```

(a) Arrays

(b) Arrays

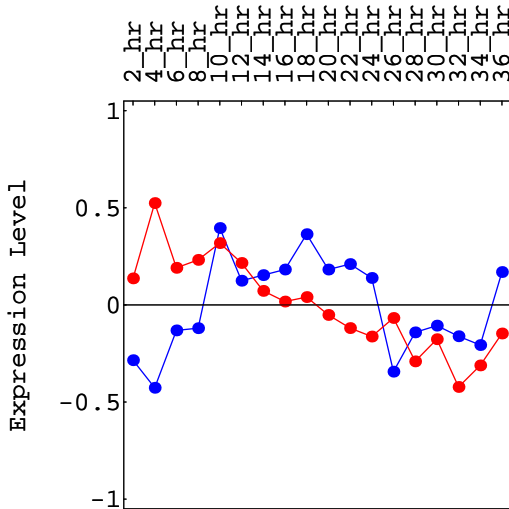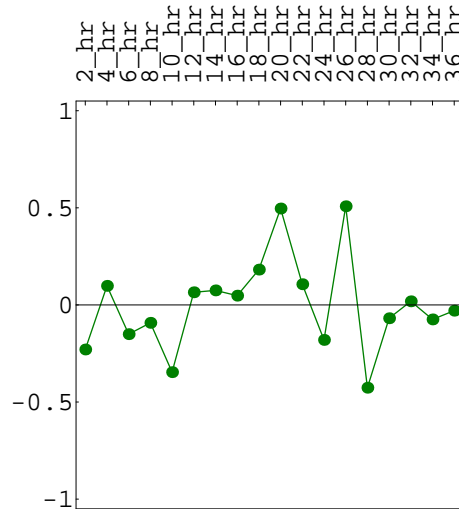

```
(* Calculate Amplitudes of the Projections of the Genelets *)
```

```
a6 = Sqrt[Dot[genelets[[6]], v[[1]]]^2 + Dot[genelets[[6]], v[[2]]]^2];
a17 = Sqrt[Dot[genelets[[17]], v[[1]]]^2 + Dot[genelets[[17]], v[[2]]]^2];
a18 = Sqrt[Dot[genelets[[18]], v[[1]]]^2 + Dot[genelets[[18]], v[[2]]]^2];
```

```
(* Calculate Angular Directions of the Projections of Genelets *)
```

```
c6 = ArcTan[Dot[genelets[[6]], v[[2]]] / Dot[genelets[[6]], v[[1]]];
c17 = ArcTan[Dot[genelets[[17]], v[[2]]] / Dot[genelets[[17]], v[[1]]];
c18 = ArcTan[Dot[genelets[[18]], v[[2]]] / Dot[genelets[[18]], v[[1]]];
c617 = 2 * Abs[Cos[c6 - c17]];
c618 = 2 * Abs[Cos[c6 - c18]];
c1718 = 2 * Abs[Cos[c17 - c18]];
```

```
(* Sort Human Arrays *)
```

```
(* Center Genelets and Calculate Contributions of Arraylets to Arrays *)
```

```
arraycontributions6 =
  (genelets[[6]] - N[Outer[Times, Dot[genelets, average], average]][[6]]) * d2[[6, 6]];
arraycontributions17 =
  (genelets[[17]] - N[Outer[Times, Dot[genelets, average], average]][[17]]) * d2[[17, 17]];
arraycontributions18 =
  (genelets[[18]] - N[Outer[Times, Dot[genelets, average], average]][[18]]) * d2[[18, 18]];
```



(\* Project Arrays from 3D Arraylets Subspace Onto 2D Subspace \*)

```
coordinates = Table[{
  - (Dot[genelets[[6]], v[[1]] * arraycontributions6[[a]] +
    Dot[genelets[[17]], v[[1]] * arraycontributions17[[a]] +
    Dot[genelets[[18]], v[[1]] * arraycontributions18[[a]]) /
  Sqrt[(a6 * arraycontributions6[[a]])^2 +
    (a17 * arraycontributions17[[a]])^2 + (a18 * arraycontributions18[[a]])^2 +
    c617 * Abs[(a6 * arraycontributions6[[a]] * (a17 * arraycontributions17[[a]])] +
    c618 * Abs[(a6 * arraycontributions6[[a]] * (a18 * arraycontributions18[[a]])] +
    c1718 * Abs[(a17 * arraycontributions17[[a]] * (a18 * arraycontributions18[[a]])]),
  (Dot[genelets[[6]], v[[2]] * arraycontributions6[[a]] +
    Dot[genelets[[17]], v[[2]] * arraycontributions17[[a]] +
    Dot[genelets[[18]], v[[2]] * arraycontributions18[[a]]) /
  Sqrt[(a6 * arraycontributions6[[a]])^2 +
    (a17 * arraycontributions17[[a]])^2 + (a18 * arraycontributions18[[a]])^2 +
    c617 * Abs[(a6 * arraycontributions6[[a]] * (a17 * arraycontributions17[[a]])] +
    c618 * Abs[(a6 * arraycontributions6[[a]] * (a18 * arraycontributions18[[a]])] +
    c1718 * Abs[(a17 * arraycontributions17[[a]] * (a18 * arraycontributions18[[a]])]),
  {a, 1, arrays}];
```

(\* Create Parameter Graph of Yeast Arrays Projected Onto 2D Subspace \*)

```
Clear[points];
points1 = {Point[coordinates[[1]], Point[coordinates[[2]]],
  Point[coordinates[[3]], Point[coordinates[[4]]]};
points2 = {Point[coordinates[[5]], Point[coordinates[[6]], Point[coordinates[[7]]]};
points3 = {Point[coordinates[[8]], Point[coordinates[[9]], Point[coordinates[[10]]]};
points4 = {Point[coordinates[[11]], Point[coordinates[[12]]]};
points5 = {Point[coordinates[[13]], Point[coordinates[[14]], Point[coordinates[[15]]],
  Point[coordinates[[16]], Point[coordinates[[17]]], Point[coordinates[[18]]]};
textcoordinates = coordinates;
Do[
  textcoordinates[[a, 1]] = If[
    textcoordinates[[a, 1]] > 0,
    textcoordinates[[a, 1]] - 0.085,
    textcoordinates[[a, 1]] + 0.095],
  {a, 1, 9}];
Do[
  textcoordinates[[a, 1]] = If[
    textcoordinates[[a, 1]] > 0,
    textcoordinates[[a, 1]] - 0.11,
    textcoordinates[[a, 1]] + 0.12],
  {a, 10, arrays}];
textcoordinates[[7]] = textcoordinates[[7]] + {0.085, -0.105};
textcoordinates[[8]] = textcoordinates[[8]] + {0.18, -0.04};
textcoordinates[[9]] = textcoordinates[[9]] + {0.085, -0.105};
textcoordinates[[11]] = textcoordinates[[11]] - {0.11, -0.105};
textcoordinates[[12]] = textcoordinates[[12]] - {0, 0.04};
textcoordinates[[15]] = textcoordinates[[15]] + {-0.02, 0.08};
textcoordinates[[16]] = textcoordinates[[16]] + {-0.02, 0.08};
textcoordinates[[17]] = textcoordinates[[17]] - {0.14, 0.11};
```

```

texts = Table[Text[a, textcoordinates[[a]], {a, 1, arrays}];
p = Show[
  {Graphics[{RGBColor[0, 0, 0], Dashing[{0.03, 0.02}], Circle[{0, 0}, 0.5]}],
  Graphics[{RGBColor[0, 0, 0], Dashing[{0.03, 0.02}], Circle[{0, 0}, 1]}],
  Graphics[{RGBColor[0, 0, 0], Dashing[{0.03, 0.02}], Line[{{0, 1.05}, {0, -1.05}}]}],
  Graphics[{RGBColor[0, 0, 0], Dashing[{0.03, 0.02}], Line[{{-1.15, 0}, {1.15, 0}}]}],
  Graphics[{RGBColor[1, 0, 0], PointSize[0.035], points1}],
  Graphics[{RGBColor[1, 0.5, 0], PointSize[0.035], points2}],
  Graphics[{RGBColor[1, 1, 0], PointSize[0.035], points3}],
  Graphics[{RGBColor[0, 0.5, 0], PointSize[0.035], points4}],
  Graphics[{RGBColor[0, 0, 1], PointSize[0.035], points5}],
  Graphics[{RGBColor[1, 0, 0], Text["E1", {1.0, -0.5}]}],
  Graphics[{RGBColor[1, 0.5, 0], Text["E2", {1.0, 0.5}]}],
  Graphics[{RGBColor[0, 0, 0], Text["M1", {0.65, 0.9}]}],
  Graphics[{RGBColor[0, 0.5, 0], Text["M2", {-1, 0.5}]}],
  Graphics[{RGBColor[0, 0, 1], Text["L1", {-1.025, -0.55}]}],
  Graphics[{RGBColor[0.75, 0, 1], Text["L2", {-0.65, -0.9}]}],
  Graphics[{RGBColor[0, 0, 0], Text["(a)", {-0.9, 0.95}]}],
  Graphics[{RGBColor[0, 0, 0], Text["|x>", {0.62, 0.08}]}],
  Graphics[{RGBColor[0, 0, 0], Text["|y>", {-0.12, 0.915}]}],
  Graphics[{RGBColor[0, 0, 0], Text["|α6", {-0.995, 0.65}]}],
  Graphics[{RGBColor[0, 0, 0], Text["|α17", {-0.92, -0.8}]}],
  Graphics[{RGBColor[0, 0, 0], Text["|α18", {0.65, -0.15}]}],
  Graphics[texts],
  Graphics[{RGBColor[0, 0, 0],
  Circle[{0, 0}, 0.4, {ArcTan[coordinates[[1, 2]] / coordinates[[1, 1]], 0}]}],
  Graphics[{RGBColor[0, 0, 0],
  Arrow[{0.4 * Cos[-0.05], 0.4 * Sin[-0.05]}, {0.4 * Cos[0], 0.4 * Sin[0]},
  HeadCenter -> 0.5, HeadLength -> 0.035, HeadWidth -> 0.75]}],
  Graphics[{RGBColor[0, 0, 0], Arrow[{0, 0}, coordinates[[1]],
  HeadCenter -> 0.5, HeadLength -> 0.035, HeadWidth -> 0.75]}],
  Graphics[{RGBColor[0, 0, 0], Text["r", {0.3, -0.65}]}],
  Graphics[{RGBColor[0, 0, 0], Text["φ", {0.275, -0.125}]}],
  Graphics[{RGBColor[0, 0, 0], Arrow[{-1.15, 1.15 * Tan[c18]}, {1.15, -1.15 * Tan[c18]},
  HeadCenter -> 0.5, HeadLength -> 0.035, HeadWidth -> 0.75]}],
  Graphics[{RGBColor[0, 0, 0], Arrow[{-1.05 / Tan[c17], 1.05}, {1.05 / Tan[c17], -1.05},
  HeadCenter -> 0.5, HeadLength -> 0.035, HeadWidth -> 0.75]}],
  Graphics[{RGBColor[0, 0, 0], Arrow[{1.15, -1.15 * Tan[c6]}, {-1.15, 1.15 * Tan[c6]},
  HeadCenter -> 0.5, HeadLength -> 0.035, HeadWidth -> 0.75]}],
  AspectRatio -> 1,
  PlotRange -> {{-1.15, 1.15}, {-1.05, 1.05}},
  Frame -> True,
  FrameTicks -> False,
  FrameLabel -> {None, None, None, None},
  GridLines -> {None, None},
  DisplayFunction -> Identity];
p = FullGraphics[p];
p[[1, 2]] = p[[1, 2]] /.
  Text[labely, {b_, c_}, {1., 0.}] ->
  Text[labely, {-1.18, 0}, {0, 0}, {0, 1}];
g1 = Show[p,
  AspectRatio -> 0.95,
  PlotRange -> All,
  DisplayFunction -> Identity];

```

```
(* Sort Human Genes *)
```

```
(* Center Arraylets and Calculate Contributions of Genelets to Genes *)
```

```
centerarraylets = Transpose[arraylets2];  
average = Table[1, {a, 1, genes}];  
average = N[average / Sqrt[Dot[average, average]]];  
centerarraylets = centerarraylets - N[Outer[Times, Dot[centerarraylets, average], average]];  
centerarraylets = Transpose[centerarraylets];  
genecontributions = Transpose[Dot[centerarraylets, d2]];
```

```
(* Project Genes from 3 D Genelets Subspace Onto 2 D Subspace *)
```

```
coordinates = Table[{  
  - (Dot[genelets[[6]], v[[1]] * genecontributions[[6, a]] +  
    Dot[genelets[[17]], v[[1]] * genecontributions[[17, a]] +  
    Dot[genelets[[18]], v[[1]] * genecontributions[[18, a]]) /  
    Sqrt[(a6 * genecontributions[[6, a]])^2 +  
      (a17 * genecontributions[[17, a]])^2 + (a18 * genecontributions[[18, a]])^2 +  
      c617 * Abs[(a6 * genecontributions[[6, a]]) * (a17 * genecontributions[[17, a]])] +  
      c618 * Abs[(a6 * genecontributions[[6, a]]) * (a18 * genecontributions[[18, a]])] +  
      c1718 * Abs[(a17 * genecontributions[[17, a]]) * (a18 * genecontributions[[18, a]])],  
  (Dot[genelets[[6]], v[[2]] * genecontributions[[6, a]] +  
    Dot[genelets[[17]], v[[2]] * genecontributions[[17, a]] +  
    Dot[genelets[[18]], v[[2]] * genecontributions[[18, a]]) /  
    Sqrt[(a6 * genecontributions[[6, a]])^2 +  
      (a17 * genecontributions[[17, a]])^2 + (a18 * genecontributions[[18, a]])^2 +  
      c617 * Abs[(a6 * genecontributions[[6, a]]) * (a17 * genecontributions[[17, a]])] +  
      c618 * Abs[(a6 * genecontributions[[6, a]]) * (a18 * genecontributions[[18, a]])] +  
      c1718 * Abs[(a17 * genecontributions[[17, a]]) * (a18 * genecontributions[[18, a]])],  
  {a, 1, genes}];
```

```
(* Create Parameter Graph of 172 Yeast Pheromone Response Genes Projected Onto 2 D Subspace *)
```

```
Clear[points, radii];  
stream = StringJoin[name, ":Desktop Folder:PNAS Data:Human_Stress_Classify.txt"];  
list = ReadList[stream, Word, RecordLists -> True, NullWords -> True];  
list = Drop[list, 1];  
stages = {"E1", "E2", "M1", "M2", "L1", "L2"};  
points = {points1, points2, points3, points4, points5, points6};  
radii = {radii1, radii2, radii3, radii4, radii5, radii6};  
Do[{  
  position = Position[list, stages[[b]]],  
  table = Table[list[[position[[a, 1]], 1]], {a, 1, Dimensions[position][[1]]},  
  position = Table[Position[genenames, table[[a]]], {a, 1, Dimensions[table][[1]]},  
  table = Flatten[Position[position, {}]],  
  Do[  
    position = Drop[position, {table[[a]], table[[a]]},  
    {a, Dimensions[table][[1]], 1, -1}],  
  points[[b]] = Table[Point[coordinates[[position[[a, 1, 1]]]], {a, 1, Dimensions[position][[1]]},  
  radii[[b]] = Table[  
    Sqrt[coordinates[[position[[a, 1, 1]], 1]]^2 + coordinates[[position[[a, 1, 1]], 2]]^2,  
    {a, 1, Dimensions[position][[1]]},  
  {b, 1, Dimensions[stages][[1]]}]
```

```
Dimensions[points[[1]]][[1]]
Dimensions[points[[2]]][[1]]
Dimensions[points[[3]]][[1]]
Dimensions[points[[4]]][[1]]
Dimensions[points[[5]]][[1]]
Dimensions[points[[6]]][[1]]
```

15

24

48

36

188

37

```
radii = Sort[Flatten[radii], OrderedQ[{{#1}, {#2}}] &];
N[Round[radii[[11]] * 100] / 100]
N[Round[radii[[12]] * 100] / 100]
```

0.48

0.53

(\* 348 stress response genes, 15 in E1, 24 in E2, 48 in M1, 36 in M2, 188 in L1, 37 in L2. \*)

(\* For 337 genes, 50% or more of the contributions of the 6 genelets add up. \*)

```
h1f0 = coordinates[[Position[genenames, "IMAGE:343744"]][[1, 1]]];
h1f2 = coordinates[[Position[genenames, "IMAGE:66317"]][[1, 1]]];
h1fx = coordinates[[Position[genenames, "IMAGE:347560"]][[1, 1]]];
h2afo = coordinates[[Position[genenames, "IMAGE:488964"]][[1, 1]]];
h2afp = coordinates[[Position[genenames, "IMAGE:128802"]][[1, 1]]];
h2afy = coordinates[[Position[genenames, "IMAGE:2315147"]][[1, 1]]];
h2afz = coordinates[[Position[genenames, "IMAGE:2315147"]][[1, 1]]];
h2bfb = coordinates[[Position[genenames, "IMAGE:1500000"]][[1, 1]]];
h2bfb2 = coordinates[[Position[genenames, "IMAGE:243784"]][[1, 1]]];
h2bfc = coordinates[[Position[genenames, "IMAGE:2056049"]][[1, 1]]];
h2bfq = coordinates[[Position[genenames, "IMAGE:430235"]][[1, 1]]];
h2bfr = coordinates[[Position[genenames, "IMAGE:1675553"]][[1, 1]]];
h3f3a = coordinates[[Position[genenames, "IMAGE:884272"]][[1, 1]]];
h3f3a2 = coordinates[[Position[genenames, "IMAGE:1415750"]][[1, 1]]];
h3f3b = coordinates[[Position[genenames, "IMAGE:950574"]][[1, 1]]];
h3f3b2 = coordinates[[Position[genenames, "IMAGE:2114004"]][[1, 1]]];
```

```

p = Show[
{Graphics[{RGBColor[0.75, 0, 1], PointSize[0.02], points[[6]]}],
Graphics[{RGBColor[1, 1, 0], PointSize[0.02], points[[3]]}],
Graphics[{RGBColor[1, 0.5, 0], PointSize[0.02], points[[2]]}],
Graphics[{RGBColor[0, 0, 1], PointSize[0.02], points[[5]]}],
Graphics[{RGBColor[1, 0, 0], PointSize[0.02], points[[1]]}],
Graphics[{RGBColor[0, 0.5, 0], PointSize[0.02], points[[4]]}],
Graphics[{RGBColor[1, 0, 0], Text["E1", {1.0, -0.5}]}],
Graphics[{RGBColor[1, 0.5, 0], Text["E2", {1.0, 0.5}]}],
Graphics[{RGBColor[0, 0, 0], Text["M1", {0.65, 0.9}]}],
Graphics[{RGBColor[0, 0.5, 0], Text["M2", {-1, 0.5}]}],
Graphics[{RGBColor[0, 0, 1], Text["L1", {-1.025, -0.55}]}],
Graphics[{RGBColor[0.75, 0, 1], Text["L2", {-0.65, -0.9}]}],
Graphics[{RGBColor[0, 0, 0], Text["(b)", {-0.9, 0.95}]}],
Graphics[{RGBColor[0, 0, 0], Text["|x>", {0.62, 0.08}]}],
Graphics[{RGBColor[0, 0, 0], Text["|y>", {0.12, 0.915}]}],
Graphics[{RGBColor[0, 0, 0], Text["| $\gamma_6$ ", {-0.995, 0.65}]}],
Graphics[{RGBColor[0, 0, 0], Text["| $\gamma_{17}$ ", {-0.92, -0.8}]}],
Graphics[{RGBColor[0, 0, 0], Text["| $\gamma_{18}$ ", {0.65, -0.15}]}],
Graphics[{RGBColor[0, 0, 0], Arrow[h1f0 - {0.045, 0.045}, h1f0 - {0.01, 0.01},
HeadCenter -> 0.5, HeadLength -> 0.035, HeadWidth -> 0.75]}],
Graphics[{RGBColor[0, 0, 0], Arrow[h1f2 - {0.045, 0.045}, h1f2 - {0.01, 0.01},
HeadCenter -> 0.5, HeadLength -> 0.035, HeadWidth -> 0.75]}],
Graphics[{RGBColor[0, 0, 0], Arrow[h1fx - {0.045, 0.045}, h1fx - {0.01, 0.01},
HeadCenter -> 0.5, HeadLength -> 0.035, HeadWidth -> 0.75]}],
Graphics[{RGBColor[0, 0, 0], Arrow[h2afo - {0.045, 0.045}, h2afo - {0.01, 0.01},
HeadCenter -> 0.5, HeadLength -> 0.035, HeadWidth -> 0.75]}],
Graphics[{RGBColor[0, 0, 0], Arrow[h2afp - {0.045, 0.045}, h2afp - {0.01, 0.01},
HeadCenter -> 0.5, HeadLength -> 0.035, HeadWidth -> 0.75]}],
Graphics[{RGBColor[0, 0, 0], Arrow[h2afy + {0.045, 0.045}, h2afy + {0.01, 0.01},
HeadCenter -> 0.5, HeadLength -> 0.035, HeadWidth -> 0.75]}],
Graphics[{RGBColor[0, 0, 0], Arrow[h2afz - {0.045, 0.045}, h2afz - {0.01, 0.01},
HeadCenter -> 0.5, HeadLength -> 0.035, HeadWidth -> 0.75]}],
Graphics[{RGBColor[0, 0, 0], Arrow[h2bfb - {0.045, 0.045}, h2bfb - {0.01, 0.01},
HeadCenter -> 0.5, HeadLength -> 0.035, HeadWidth -> 0.75]}],
Graphics[{RGBColor[0, 0, 0], Arrow[h2bfb2 - {0.045, 0.045}, h2bfb2 - {0.01, 0.01},
HeadCenter -> 0.5, HeadLength -> 0.035, HeadWidth -> 0.75]}],
Graphics[{RGBColor[0, 0, 0], Arrow[h2bfc - {0.045, 0.045}, h2bfc - {0.01, 0.01},
HeadCenter -> 0.5, HeadLength -> 0.035, HeadWidth -> 0.75]}],
Graphics[{RGBColor[0, 0, 0], Arrow[h2bfq + {0.045, 0.045}, h2bfq + {0.01, 0.01},
HeadCenter -> 0.5, HeadLength -> 0.035, HeadWidth -> 0.75]}],
Graphics[{RGBColor[0, 0, 0], Arrow[h2bfr + {0.045, 0.045}, h2bfr + {0.01, 0.01},
HeadCenter -> 0.5, HeadLength -> 0.035, HeadWidth -> 0.75]}],
Graphics[{RGBColor[0, 0, 0], Arrow[h3f3a - {0.045, 0.045}, h3f3a - {0.01, 0.01},
HeadCenter -> 0.5, HeadLength -> 0.035, HeadWidth -> 0.75]}],
Graphics[{RGBColor[0, 0, 0], Arrow[h3f3a2 + {0.045, 0.045}, h3f3a2 + {0.01, 0.01},
HeadCenter -> 0.5, HeadLength -> 0.035, HeadWidth -> 0.75]}],
Graphics[{RGBColor[0, 0, 0], Arrow[h3f3b - {0.045, 0.045}, h3f3b - {0.01, 0.01},
HeadCenter -> 0.5, HeadLength -> 0.035, HeadWidth -> 0.75]}],
Graphics[{RGBColor[0, 0, 0], Arrow[h3f3b2 - {0.045, 0.045}, h3f3b2 - {0.01, 0.01},
HeadCenter -> 0.5, HeadLength -> 0.035, HeadWidth -> 0.75]}],
Graphics[{RGBColor[0, 0, 0], Dashing[{0.03, 0.02}], Circle[{0, 0}, 0.5]}],
Graphics[{RGBColor[0, 0, 0], Dashing[{0.03, 0.02}], Circle[{0, 0}, 1]}],
Graphics[{RGBColor[0, 0, 0], Dashing[{0.03, 0.02}], Line[{{0, 1.05}, {0, -1.05}}]}],
Graphics[{RGBColor[0, 0, 0], Dashing[{0.03, 0.02}], Line[{{-1.15, 0}, {1.15, 0}}]}],
Graphics[{RGBColor[0, 0, 0], Arrow[{-1.15, 1.15 * Tan[c18]}, {1.15, -1.15 * Tan[c18]},
HeadCenter -> 0.5, HeadLength -> 0.035, HeadWidth -> 0.75]}],
Graphics[{RGBColor[0, 0, 0], Arrow[{-1.05 / Tan[c17], 1.05}, {1.05 / Tan[c17], -1.05},
HeadCenter -> 0.5, HeadLength -> 0.035, HeadWidth -> 0.75]}],
Graphics[{RGBColor[0, 0, 0], Arrow[{1.15, -1.15 * Tan[c6]}, {-1.15, 1.15 * Tan[c6]},
HeadCenter -> 0.5, HeadLength -> 0.035, HeadWidth -> 0.75]}],
AspectRatio -> 1, PlotRange -> {{-1.15, 1.15}, {-1.05, 1.05}}, Frame -> True,
FrameTicks -> {False, FrameLabel -> {None, None, None, None}},
GridLines -> {None, None},
DisplayFunction -> Identity];

```

```

p = FullGraphics[p];
p[[1, 2]] = p[[1, 2]] /.
  Text[labely, {b_, c_}, {1., 0.}] ->
  Text[labely, {-1.18, 0}, {0, 0}, {0, 1}];
g2 = Show[p,
  AspectRatio -> 0.95,
  PlotRange -> All,
  DisplayFunction -> Identity];

```

(\* Display Both Arrays & Genes Parameter Graphs \*)

```

Show[GraphicsArray[{g1, g2}],
  GraphicsSpacing -> 0];

```

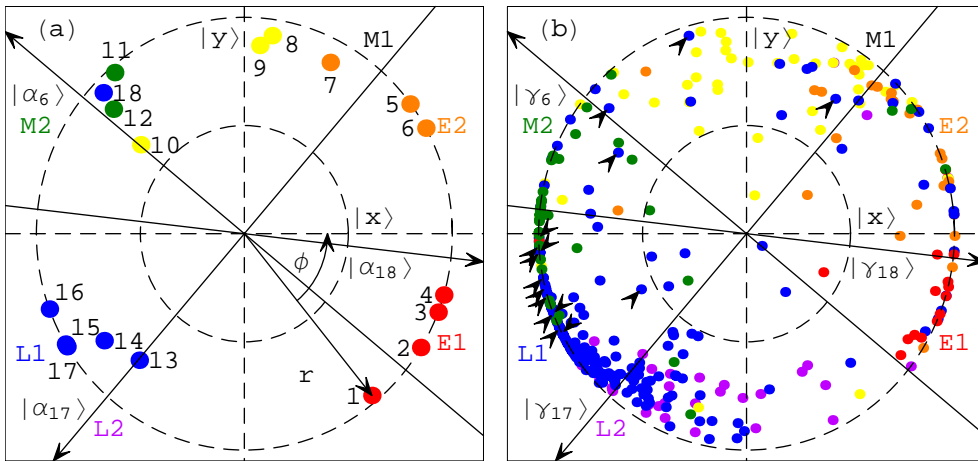

```
(* Reconstruct Human Data in Exclusive Stress Response Subspace *)
```

```
(* Sort Human Genes *)
```

```
matrix = matrix2;  
genes = genes2;  
arraynames = arraynames2;  
genenames = genenames2;
```

```
(* Center Arraylets and Calculate Contributions of Genelets to Genes *)
```

```
centerarraylets = Transpose[arraylets2];  
average = Table[1, {a, 1, genes}];  
average = N[average / Sqrt[Dot[average, average]]];  
centerarraylets = centerarraylets - N[Outer[Times, Dot[centerarraylets, average], average]];  
centerarraylets = Transpose[centerarraylets];  
genecontributions = Transpose[Dot[centerarraylets, d2]];
```

```
(* Project Genes from 3 D Genelets Subspace Onto 2 D Subspace *)
```

```
coordinates = Table[{  
  - (Dot[genelets[[6]], v[[1]]] * genecontributions[[6, a]] +  
    Dot[genelets[[17]], v[[1]]] * genecontributions[[17, a]] +  
    Dot[genelets[[18]], v[[1]]] * genecontributions[[18, a]]) /  
  Sqrt[(a6 * genecontributions[[6, a]])^2 +  
    (a17 * genecontributions[[17, a]])^2 + (a18 * genecontributions[[18, a]])^2 +  
    c617 * Abs[(a6 * genecontributions[[6, a]]) * (a17 * genecontributions[[17, a]])] +  
    c618 * Abs[(a6 * genecontributions[[6, a]]) * (a18 * genecontributions[[18, a]])] +  
    c1718 * Abs[(a17 * genecontributions[[17, a]]) * (a18 * genecontributions[[18, a]])]),  
  (Dot[genelets[[6]], v[[2]]] * genecontributions[[6, a]] +  
    Dot[genelets[[17]], v[[2]]] * genecontributions[[17, a]] +  
    Dot[genelets[[18]], v[[2]]] * genecontributions[[18, a]]) /  
  Sqrt[(a6 * genecontributions[[6, a]])^2 +  
    (a17 * genecontributions[[17, a]])^2 + (a18 * genecontributions[[18, a]])^2 +  
    c617 * Abs[(a6 * genecontributions[[6, a]]) * (a17 * genecontributions[[17, a]])] +  
    c618 * Abs[(a6 * genecontributions[[6, a]]) * (a18 * genecontributions[[18, a]])] +  
    c1718 * Abs[(a17 * genecontributions[[17, a]]) * (a18 * genecontributions[[18, a]])]),  
  {a, 1, genes}];
```

```
(* Define the Initial Phase *)
```

```
zerophase = Pi / 2;
```

(\* Sort Genes According to Phases in 2D Subspace \*)

```
coordinates = Table[{
  coordinates[[a, 1]] / Sqrt[coordinates[[a, 1]]^2 + coordinates[[a, 2]]^2],
  coordinates[[a, 2]] / Sqrt[coordinates[[a, 1]]^2 + coordinates[[a, 2]]^2]},
{a, 1, genes}];
coordinates = Table[{
  -coordinates[[a, 1]] * Cos[zerophase] - coordinates[[a, 2]] * Sin[zerophase],
  -coordinates[[a, 2]] * Cos[zerophase] + coordinates[[a, 1]] * Sin[zerophase]},
{a, 1, genes}];
coordinates = Table[{
  coordinates[[a, 1]],
  coordinates[[a, 2]],
  N[ArcTan[coordinates[[a, 1]] / coordinates[[a, 2]]] / Pi},
{a, 1, genes}];
sortmatrix = AppendRows[coordinates, genenames, matrix];
sortmatrix = Sort[sortmatrix, OrderedQ[{{#1}, {#2}}] &];
negative1 = 6050;
positive1 = 6051;
sortmatrix[[negative1, 1]]
sortmatrix[[positive1, 1]]

-0.000203326

0.000163054

sortmatrix = Transpose[Drop[Transpose[sortmatrix], {1}]];
sortmatrix = AppendColumns[
  Sort[
    TakeRows[sortmatrix, {1, negative1}],
    OrderedQ[{{#2}, {#1}}] &],
  Sort[
    TakeRows[sortmatrix, {positive1, genes}],
    OrderedQ[{{#1}, {#2}}] &];
phases = TakeColumns[sortmatrix, {2, 2}];
sortmatrix = Transpose[Drop[Transpose[sortmatrix], {1, 2}]];
```



(\* Classify Gene Phases into Cell Cycle Phases \*)

```
ph1 = c17 / Pi;  
ph2 = -c6 / Pi;  
ph3 = c18 / Pi;  
ph4 = 1 + c17 / Pi;  
ph5 = 1 - c6 / Pi;  
ph6 = 1 + c18 / Pi;
```

```
endph6 = 2523;  
beginph1 = 2524;  
phases[[endph6]] - ph1  
phases[[beginph1]] - ph1
```

{0.0000166825}

{-0.000104095}

```
endph1 = 4127;  
beginph2 = 4128;  
phases[[endph1]] - ph2  
phases[[beginph2]] - ph2
```

{-0.282855}

{0.716697}

```
endph2 = 5850;  
beginph3 = 5851;  
phases[[endph2]] - ph3  
phases[[beginph3]] - ph3
```

{0.0000244319}

{-0.000107144}

```
endph3 = 8600;  
beginph4 = 8601;  
phases[[endph3]] - ph4  
phases[[beginph4]] - ph4
```

{-0.999973}

{-1.00008}

```
endph4 = 10100;  
beginph5 = 10101;  
phases[[endph4]] - ph5  
phases[[beginph5]] - ph5
```

{-1.28262}

{-0.282974}

```
endph5 = 11839;  
beginph6 = 11840;  
phases[[endph5]] - ph6  
phases[[beginph6]] - ph6
```

{-0.999879}

{-1.00005}

(\* 12056 human genes, 1739 in E1, 2740 in E2, 1604 in M1, 1723 in M2, 2750 in L1, 1500 in L2. \*)

```
(* Reconstruct Data With Sorted Genes *)
```

```
matrix2 = TakeColumns[sortmatrix, {6, arrays + 5}];  
genenames2 = TakeColumns[sortmatrix, {1, 5}];
```

```
(* Calculate GSVD of Sorted Human and Yeast Data *)
```

```
matrix = AppendColumns[matrix1, matrix2];  
{q, r} = QRDecomposition[matrix];  
q = Conjugate[Transpose[q]];  
q1 = TakeRows[q, {1, genes1}];  
{u1, w1, v1} = SingularValues[q1];  
genelets = Dot[v1, r];  
Do[genelets[[a]] = genelets[[a]] / Sqrt[Dot[genelets[[a]], genelets[[a]]],  
  {a, 1, arrays}]  
  
genelets[[2]] = -genelets[[2]];  
genelets[[5]] = -genelets[[5]];  
genelets[[14]] = -genelets[[14]];  
genelets[[16]] = -genelets[[16]];  
genelets[[17]] = -genelets[[17]]; genelets[[18]] = -genelets[[18]];  
  
arraylets1 = Dot[matrix1, Inverse[genelets]];  
arraylets2 = Dot[matrix2, Inverse[genelets]];  
arraylets1 = Transpose[arraylets1];  
Do[arraylets1[[a]] = arraylets1[[a]] / Sqrt[Dot[arraylets1[[a]], arraylets1[[a]]], {a, 1, arrays}];  
arraylets1 = Transpose[arraylets1];  
arraylets2 = Transpose[arraylets2];  
Do[arraylets2[[a]] = arraylets2[[a]] / Sqrt[Dot[arraylets2[[a]], arraylets2[[a]]], {a, 1, arrays}];  
arraylets2 = Transpose[arraylets2];  
d1 = Chop[Dot[PseudoInverse[arraylets1], matrix1, Inverse[genelets]]];  
d2 = Chop[Dot[PseudoInverse[arraylets2], matrix2, Inverse[genelets]]];
```

```
(* Display Sorted and Reconstructed Human Data *)
```

```
genes = genes2;  
genenames = genenames2;  
arraynames = arraynames2;  
{endph1, endph2, endph3, endph4, endph5, endph6} = {4127, 5850, 8600, 10100, 11839, 2523};
```

```
(* Reconstruct Sorted Human Data *)
```

```
Do[d2[[a, a]] = 0, {a, 1, 5}];  
Do[d2[[a, a]] = 0, {a, 7, 16}];  
matrix = Dot[arraylets2, d2, genelets];
```

```
(* Center Sorted Human Data *)
```

```
average = Table[1, {a, 1, arrays}];  
average = N[average / Sqrt[Dot[average, average]]];  
matrix = matrix - N[Outer[Times, Dot[matrix, average], average]];  
matrix = Transpose[matrix];  
average = Table[1, {a, 1, genes}];  
average = N[average / Sqrt[Dot[average, average]]];  
matrix = matrix - N[Outer[Times, Dot[matrix, average], average]];  
matrix = Transpose[matrix];
```

(\* Create Reconstructed Sorted Human Data 2D Red & Green Raster Display \*)

```

contrast = 15 * 1.5;
displaying = Table[
  If[contrast * matrix[[i, j]] > 0,
    If[contrast * matrix[[i, j]] < 1, {contrast * matrix[[i, j]], 0}, {1, 0}],
    If[contrast * matrix[[i, j]] > -1, {0, -contrast * matrix[[i, j]]}, {0, 1}]],
  {i, 1, genes}, {j, 1, arrays}];
framex = Table[{a - 0.5, arraynames[[2, a]]}, {a, 1, arrays}];
framey = {
  {genes - endph6 / 2, "E2"},
  {genes - (endph6 + endph1) / 2, "M1"},
  {genes - (endph1 + endph2) / 2, "M2"},
  {genes - (endph2 + endph3) / 2, "L1"},
  {genes - (endph3 + endph4) / 2, "L2"},
  {genes - (endph4 + endph5) / 2, "E1"},
  {(genes - endph5) / 2, "E2"}];
gridy = {
  {genes - endph5 + 0.5, {RGBColor[0, 0, 0]}},
  {genes - endph6 + 0.5, {RGBColor[0, 0, 0]}},
  {genes - endph1 + 0.5, {RGBColor[0, 0, 0]}},
  {genes - endph2 + 0.5, {RGBColor[0, 0, 0]}},
  {genes - endph3 + 0.5, {RGBColor[0, 0, 0]}},
  {genes - endph4 + 0.5, {RGBColor[0, 0, 0]}}];
labelx = "(a) Arrays";
labely = ColumnForm[{" ", "Genes", " ", " ", " ", " ", " ", " ", " "}, Center];
g = Show[
  Graphics[
    RasterArray[
      Table[
        RGBColor[displaying[[i, j, 1]], displaying[[i, j, 2]], 0],
        {i, genes, 1, -1}, {j, 1, arrays}]]],
  AspectRatio -> 1,
  Frame -> True,
  FrameTicks -> {None, framey, framex, None},
  FrameLabel -> {None, labely, labelx, None},
  GridLines -> {None, gridy},
  DisplayFunction -> Identity];
g = FullGraphics[g];
g[[1, 2]] = g[[1, 2]] /.
  Text[labely, {b_, c_}, {1., 0.}] ->
  Text[labely, {b, c}, {0, 0}, {0, 1}];
g[[1, 2]] = g[[1, 2]] /.
  Text[a_, {b_, c_}, {1., 0.}] ->
  Text[a, {b - 1.5, c}, {0, 0}, {0, 1}];
g[[1, 2]] = g[[1, 2]] /.
  Text[labelx, {b_, c_}, {0., -1.}] ->
  Text[labelx, {b, c + 1100}, {0, -1}, {1, 0}];
g[[1, 2]] = g[[1, 2]] /.
  Text[a_, {b_, c_}, {0., -1.}] ->
  Text[a, {b, c + 450}, {0, 0}, {0, 1}];
g1 = Show[g,
  AspectRatio -> GoldenRatio * 2,
  PlotRange -> All,
  DisplayFunction -> Identity];

```

(\* Center Sorted Human Arraylets \*)

```

arraylets = Transpose[arraylets2];
average = Table[1, {a, 1, genes}];
average = N[average / Sqrt[Dot[average, average]]];
arraylets = arraylets - N[Outer[Times, Dot[arraylets, average], average]];
arraylets = Transpose[arraylets];

```

```
(* Create Sorted Human Arraylets 2 D Red & Green Raster Display *)
```

```
contrast = 125 * 1.5;
displaying = Table[
  If[contrast * arraylets[[i, j]] > 0,
    If[contrast * arraylets[[i, j]] < 1, {contrast * arraylets[[i, j]], 0}, {1, 0}],
    If[contrast * arraylets[[i, j]] > -1, {0, -contrast * arraylets[[i, j]]}, {0, 1}]],
  {i, 1, genes}, {j, 1, arrays}];
labelx = "(b) Arraylets";
labely = ColumnForm[{" ", " ", " ", " ", " ", " ", " ", " ", " ", " ", " "}, Center];
framey = {
  {genes - endph6 / 2, " "},
  {genes - (endph6 + endph1) / 2, " "},
  {genes - (endph1 + endph2) / 2, " "},
  {genes - (endph2 + endph3) / 2, " "},
  {genes - (endph3 + endph4) / 2, " "},
  {genes - (endph4 + endph5) / 2, " "},
  {(genes - endph5) / 2, " "}};
gridy = {
  {genes - endph5 + 0.5, {RGBColor[0, 0, 0]}},
  {genes - endph6 + 0.5, {RGBColor[0, 0, 0]}},
  {genes - endph1 + 0.5, {RGBColor[0, 0, 0]}},
  {genes - endph2 + 0.5, {RGBColor[0, 0, 0]}},
  {genes - endph3 + 0.5, {RGBColor[0, 0, 0]}},
  {genes - endph4 + 0.5, {RGBColor[0, 0, 0]}}];
framex = Table[{a - 0.5, ToString[a]}, {a, 1, arrays}];
size = 5;
sizes = Flatten[
  Table[
    Dimensions[
      Characters[
        framex[[a, 2]]
      ]], {a, 1, arrays}]];
Do[
  Do[framex[[a, 2]] = StringJoin[framex[[a, 2]], " "],
    {b, 1, size - sizes[[a]]}],
  {a, 1, arrays}];
g = Show[
  Graphics[
    RasterArray[
      Table[
        RGBColor[displaying[[i, j, 1]], displaying[[i, j, 2]], 0],
        {i, genes, 1, -1}, {j, 1, arrays}]]],
    AspectRatio -> 1, Frame -> True,
    FrameTicks -> {None, framey, framex, None},
    FrameLabel -> {None, labely, labelx, None},
    GridLines -> {None, gridy},
    DisplayFunction -> Identity];
g = FullGraphics[g];
g[[1, 2]] = g[[1, 2]] /.
  Text[labely, {b_, c_}, {1., 0.}] ->
  Text[labely, {b, c}, {0, 0}, {0, 1}];
g[[1, 2]] = g[[1, 2]] /.
  Text[a_, {b_, c_}, {1., 0.}] ->
  Text[a, {b - 1.5, c}, {0, 0}, {0, 1}];
g[[1, 2]] = g[[1, 2]] /.
  Text[labelx, {b_, c_}, {0., -1.}] ->
  Text[labelx, {b, c + 1100}, {0, -1}, {1, 0}];
g[[1, 2]] = g[[1, 2]] /.
  Text[a_, {b_, c_}, {0., -1.}] ->
  Text[a, {b, c + 450}, {0, 0}, {0, 1}];
g2 = Show[g,
  AspectRatio -> GoldenRatio * 2,
  PlotRange -> All,
  DisplayFunction -> Identity];
```

```
(* Create Selected Sorted Human Arraylets Graph Display *)
```

```
arraylets = Transpose[arraylets2];

labelx = "(c) Expression Level";
labely = ColumnForm[{" ", " ", " ", " ", " ", " ", " ", " ", " ", " "}, Center];
framex = {{0, "0"}, {0.05, "0.05"}, {0.1, "0.1"}};
coordinates = Table[
  If[arraylets[[6, a]] < -0.025, -0.025,
    If[arraylets[[6, a]] > 0.125, 0.125, arraylets[[6, a]]],
  {a, 1, genes}];
coordinates = Table[{coordinates[[a]], -a + 1}, {a, 1, genes}];
line = Line[coordinates];
g = Show[
  Graphics[{RGBColor[1, 0, 0], line}],
  Frame -> True,
  FrameLabel -> {None, labely, labelx, None},
  FrameTicks -> {None, None, framex, None},
  GridLines -> {{{0, RGBColor[0, 0, 0]}}, None},
  AspectRatio -> GoldenRatio * 1.15,
  PlotRange -> {{-0.025, 0.125}, {360, -genes + 1 - 360}},
  DisplayFunction -> Identity];
g = FullGraphics[g];
g[[1, 2]] = g[[1, 2]] /.
  Text[labely, {b_, c_}, {1., 0.}] ->
  Text[labely, {b, c}, {0, 0}, {0, 1}];
g[[1, 2]] = g[[1, 2]] /.
  Text[a_, {b_, c_}, {1., 0.}] ->
  Text[a, {b - 0.01, c}, {0, 0}, {0, 1}];
g[[1, 2]] = g[[1, 2]] /.
  Text[labelx, {b_, c_}, {0., -1.}] ->
  Text[labelx, {b, c + 1150}, {0, -1}, {1, 0}];
g[[1, 2]] = g[[1, 2]] /.
  Text[a_, {b_, c_}, {0., -1.}] ->
  Text[a, {b, c + 550}, {0, 0}, {0, 1}];
p6 = Show[g,
  AspectRatio -> GoldenRatio * 2.1275,
  PlotRange -> All,
  DisplayFunction -> Identity];
```

```

labelx = "(c) Expression Level";
labeledy = ColumnForm[{" ", " ", " ", " ", " ", " ", " ", " ", " ", " "}, Center];
framex = {{0, "0"}, {0.05, "0.05"}, {0.1, "0.1"}};
coordinates = Table[
  If[arraylets[[17, a]] + 0.05 > 0.125, 0.125, arraylets[[17, a]] + 0.05],
  {a, 1, genes}];
coordinates = Table[{coordinates[[a]], -a + 1}, {a, 1, genes}];
line = Line[coordinates];
g = Show[
  Graphics[{RGBColor[0, 0, 1], line}],
  Frame -> True,
  FrameLabel -> {None, labeledy, labelx, None},
  FrameTicks -> {None, None, framex, None},
  GridLines -> {{{0.05, RGBColor[0, 0, 0]}}, None},
  AspectRatio -> GoldenRatio * 1.15,
  PlotRange -> {{-0.025, 0.125}, {360, -genes + 1 - 360}},
  DisplayFunction -> Identity];
g = FullGraphics[g];
g[[1, 2]] = g[[1, 2]] /.
  Text[labeledy, {b_, c_}, {1., 0.}] ->
  Text[labeledy, {b, c}, {0, 0}, {0, 1}];
g[[1, 2]] = g[[1, 2]] /.
  Text[a_, {b_, c_}, {1., 0.}] ->
  Text[a, {b - 0.01, c}, {0, 0}, {0, 1}];
g[[1, 2]] = g[[1, 2]] /.
  Text[labelx, {b_, c_}, {0., -1.}] ->
  Text[labelx, {b, c + 1150}, {0, -1}, {1, 0}];
g[[1, 2]] = g[[1, 2]] /.
  Text[a_, {b_, c_}, {0., -1.}] ->
  Text[a, {b, c + 550}, {0, 0}, {0, 1}];
p17 = Show[g,
  AspectRatio -> GoldenRatio * 2.1275,
  PlotRange -> All,
  DisplayFunction -> Identity];

```

```

labelx = "(c) Expression Level";
labely = ColumnForm[{" ", " ", " ", " ", " ", " ", " ", " ", " ", " "}, Center];
framex = {{0, "0"}, {0.05, "0.05"}, {0.1, "0.1"}};
coordinates = Table[
  If[arraylets[[18, a]] + 0.1 > 0.125, 0.125, arraylets[[18, a]] + 0.1],
  {a, 1, genes}];
coordinates = Table[{coordinates[[a]], -a + 1}, {a, 1, genes}];
line = Line[coordinates];
g = Show[
  Graphics[{RGBColor[0, 0.5, 0], line}],
  Frame -> True,
  FrameLabel -> {None, labely, labelx, None},
  FrameTicks -> {None, None, framex, None},
  GridLines -> {{{0.1, RGBColor[0, 0, 0]}}, None},
  AspectRatio -> GoldenRatio * 1.15,
  PlotRange -> {{-0.025, 0.125}, {360, -genes + 1 - 360}},
  DisplayFunction -> Identity];
g = FullGraphics[g];
g[[1, 2]] = g[[1, 2]] /.
  Text[labely, {b_, c_}, {1., 0.}] ->
  Text[labely, {b, c}, {0, 0}, {0, 1}];
g[[1, 2]] = g[[1, 2]] /.
  Text[a_, {b_, c_}, {1., 0.}] ->
  Text[a, {b - 0.01, c}, {0, 0}, {0, 1}];
g[[1, 2]] = g[[1, 2]] /.
  Text[labelx, {b_, c_}, {0., -1.}] ->
  Text[labelx, {b, c + 1150}, {0, -1}, {1, 0}];
g[[1, 2]] = g[[1, 2]] /.
  Text[a_, {b_, c_}, {0., -1.}] ->
  Text[a, {b, c + 550}, {0, 0}, {0, 1}];
p18 = Show[g,
  AspectRatio -> GoldenRatio * 2.1275,
  PlotRange -> All,
  DisplayFunction -> Identity];

(* Display Selected Sorted Human Arraylets *)

g3 = Show[{p6, p17, p18},
  DisplayFunction -> Identity];

```

(\* Display Reconstructed Sorted Yeast and Human Data, Arraylets and Selected Arraylets \*)

```
Show[GraphicsArray[{g1, g2, g3}],  
GraphicsSpacing -> -0.2];
```

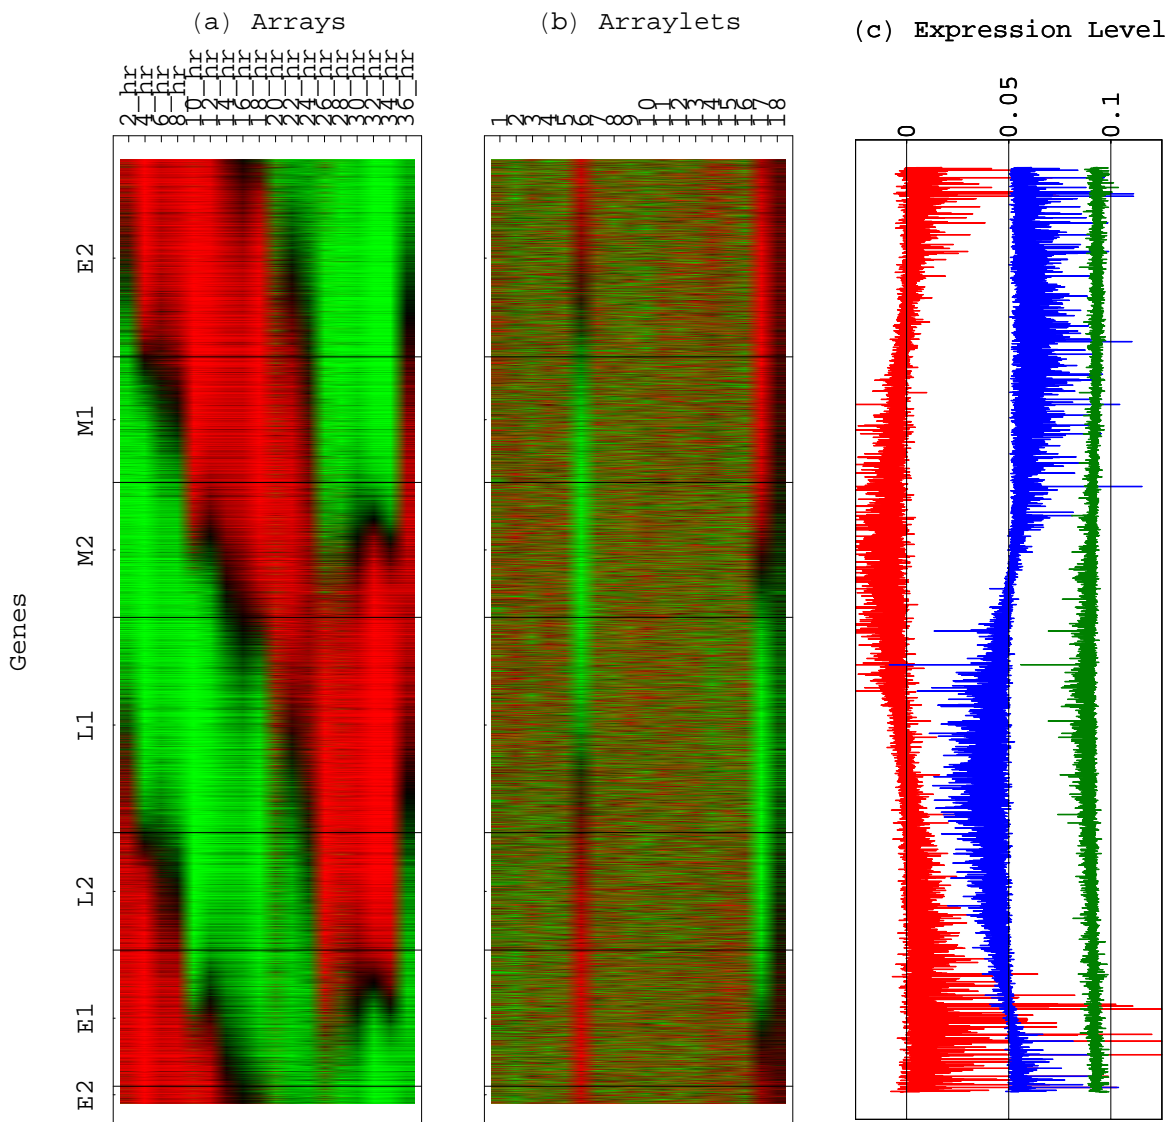

Supplement: pnas_0530258100_12.pdf [file pnas_0530258100_12.pdf]
